# Supplementary material for: The Effect of Cluster Size on the Intra-Cluster Ionic Polymerization Process
Source: MDPI journal article supplement (doi:10.3390/molecules26164782), 2021-08-07
Supplement: s1 [file s1]

# **The effect of cluster size on the intra-cluster ionic polymerization process**

Estefania Rossich Molina<sup>1</sup> and Tamar Stein<sup>1</sup>

<sup>1</sup>Fritz Haber Research Center for Molecular Dynamics, The Hebrew University of Jerusalem, Jerusalem,  
Israel, 9190401

\*Corresponding author: [tamar.stein@mail.huji.ac.il](mailto:tamar.stein@mail.huji.ac.il), Tel: +972-2-658-6108

Section 1 reports the cartesian coordinates of all optimized neutral structures for the decamers and eicosamers, used as starting structures in molecular dynamics simulations. “DEC” is used to report the decamers, while “EICO” is used to report the eicosamers.

In Section 2, the corresponding optimized cationic structures for each isomer are reported.

Indexes 1 to 20 were used to identify the correspondence between neutral and ionic structures at each cluster size.

## Section 1: Optimized neutral structures

### DEC 1

0 1

|   |           |           |           |
|---|-----------|-----------|-----------|
| C | 4.835087  | 3.147014  | -0.256465 |
| H | 5.303762  | 4.092289  | -0.408081 |
| C | 4.846693  | -1.875739 | -0.612386 |
| H | 4.035231  | -2.485598 | -0.946677 |
| C | 5.746639  | -1.184900 | -0.229840 |
| H | 6.546564  | -0.562915 | 0.101253  |
| C | 4.313060  | 2.083314  | -0.083370 |
| H | 3.841693  | 1.137080  | 0.074559  |
| C | 0.948010  | 3.319471  | -0.636404 |
| H | 1.994525  | 3.311021  | -0.418532 |
| C | -0.224103 | 3.328092  | -0.884626 |
| H | -1.268863 | 3.332220  | -1.109551 |
| C | -0.736431 | 0.023267  | -1.863018 |
| H | -0.120168 | 0.768406  | -2.315171 |
| C | -1.427369 | -0.797845 | -1.329640 |
| H | -2.037093 | -1.524555 | -0.838001 |
| C | 1.374503  | -3.161393 | -1.066281 |
| H | 0.902563  | -2.228014 | -1.289926 |
| C | 1.887753  | -4.211454 | -0.804214 |
| H | 2.335098  | -5.151418 | -0.574043 |
| C | -2.236007 | -3.021814 | 1.783366  |
| H | -3.278070 | -3.214912 | 1.901358  |
| C | 1.308713  | 0.060318  | 1.156867  |
| H | 0.492776  | 0.715846  | 0.938199  |
| C | 2.219161  | -0.679316 | 1.402928  |
| H | 3.040584  | -1.328734 | 1.607775  |
| C | -1.068205 | -2.799638 | 1.636418  |
| H | -0.030251 | -2.590388 | 1.494823  |
| C | -4.602659 | -0.823780 | 0.372177  |
| H | -4.044960 | -0.203094 | 1.041723  |
| C | -5.214039 | -1.517301 | -0.389120 |
| H | -5.765295 | -2.127985 | -1.067075 |
| C | -3.707449 | 2.305613  | -1.330393 |
| H | -3.389738 | 1.291437  | -1.446532 |
| C | -4.053500 | 3.444896  | -1.200364 |
| H | -4.374368 | 4.456048  | -1.093507 |
| C | -2.259511 | 1.672577  | 1.914295  |
| H | -2.543351 | 2.572144  | 1.416011  |
| C | -1.944679 | 0.656562  | 2.464944  |
| H | -1.658448 | -0.257606 | 2.935852  |

### DEC 2

0 1

|   |           |           |          |
|---|-----------|-----------|----------|
| C | -0.579571 | -1.417488 | 1.283163 |
|---|-----------|-----------|----------|

|   |           |           |           |
|---|-----------|-----------|-----------|
| C | -0.959046 | -1.884740 | 2.319095  |
| H | -0.238436 | -1.001427 | 0.358204  |
| H | -1.298816 | -2.305601 | 3.237865  |
| C | -1.495412 | 3.125846  | -2.941352 |
| C | -0.558013 | 3.708979  | -2.477116 |
| H | -2.327427 | 2.596532  | -3.347557 |
| H | 0.280115  | 4.214999  | -2.048792 |
| C | -3.436905 | -3.549808 | 0.050490  |
| C | -3.825352 | -4.654909 | -0.197889 |
| H | -3.079161 | -2.566636 | 0.267153  |
| H | -4.181805 | -5.635501 | -0.415275 |
| C | -1.470958 | 3.079495  | 0.944985  |
| C | -1.117322 | 2.147683  | 1.609314  |
| H | -1.773642 | 3.906452  | 0.343702  |
| H | -0.784518 | 1.319073  | 2.194961  |
| C | 1.109593  | 0.661814  | -1.440739 |
| C | 2.001416  | 0.177357  | -0.802956 |
| H | 0.312913  | 1.107025  | -1.997401 |
| H | 2.783717  | -0.264972 | -0.226039 |
| C | 0.590321  | -2.969675 | -2.059853 |
| C | -0.244785 | -3.633204 | -1.514802 |
| H | 1.329088  | -2.363927 | -2.534407 |
| H | -1.005897 | -4.203487 | -1.028253 |
| C | 2.215619  | 1.665337  | 2.935008  |
| C | 2.076942  | 0.481273  | 2.820647  |
| H | 2.330811  | 2.721967  | 3.024637  |
| H | 1.949386  | -0.573131 | 2.708056  |
| C | 1.960680  | 3.893740  | 0.117328  |
| C | 2.213379  | 5.063974  | 0.079368  |
| H | 1.732475  | 2.849182  | 0.145654  |
| H | 2.444449  | 6.104037  | 0.051858  |
| C | 2.733436  | -2.871748 | 0.957769  |
| C | 3.727664  | -2.512234 | 1.520607  |
| H | 1.848829  | -3.186414 | 0.446389  |
| H | 4.612166  | -2.196929 | 2.025609  |
| C | -2.474966 | -0.701995 | -1.992736 |
| C | -2.483449 | 0.202047  | -1.206627 |
| H | -2.459191 | -1.518171 | -2.679132 |
| H | -2.460970 | 1.002512  | -0.497753 |

### DEC 3

0 1

|   |           |           |           |
|---|-----------|-----------|-----------|
| C | 4.509700  | 0.740629  | -0.287207 |
| C | 5.192664  | 1.442630  | -0.976218 |
| H | 3.898770  | 0.115131  | 0.327297  |
| H | 5.805772  | 2.063399  | -1.588552 |
| C | 0.925645  | 3.986242  | -0.706973 |
| C | 1.979148  | 3.435361  | -0.562218 |
| H | -0.023353 | 4.456712  | -0.833486 |
| H | 2.908138  | 2.924026  | -0.428624 |
| C | -0.117249 | -2.291643 | 3.331652  |
| C | 0.172916  | -3.394669 | 3.698242  |
| H | -0.370745 | -1.308861 | 2.994491  |
| H | 0.422866  | -4.374065 | 4.037492  |
| C | 2.746610  | -2.389817 | -0.495864 |
| C | 2.366990  | -2.489334 | 0.635453  |
| H | 3.089926  | -2.286473 | -1.500542 |
| H | 2.022389  | -2.566827 | 1.643379  |
| C | -2.557758 | 3.659047  | -2.211223 |
| C | -2.474499 | 2.872801  | -1.311815 |
| H | -2.639460 | 4.356242  | -3.013286 |

|   |           |           |           |
|---|-----------|-----------|-----------|
| H | -2.405472 | 2.162136  | -0.516071 |
| C | -4.661936 | -0.776284 | -2.065189 |
| C | -3.547127 | -0.399248 | -2.289236 |
| H | -5.658777 | -1.098904 | -1.869382 |
| H | -2.550302 | -0.062617 | -2.479849 |
| C | -2.199903 | -3.358102 | -0.797415 |
| C | -1.493771 | -3.499400 | 0.159639  |
| H | -2.831008 | -3.206778 | -1.644365 |
| H | -0.871348 | -3.617617 | 1.018746  |
| C | 0.210193  | 0.601147  | -1.979172 |
| C | 0.016306  | -0.536257 | -1.652940 |
| H | 0.386835  | 1.621838  | -2.238351 |
| H | -0.154723 | -1.547092 | -1.351402 |
| C | -1.966290 | 0.883013  | 1.892786  |
| C | -2.376280 | -0.034293 | 1.239729  |
| H | -1.587533 | 1.691985  | 2.474963  |
| H | -2.731958 | -0.857382 | 0.657712  |
| C | 1.895368  | 0.804887  | 2.721929  |
| C | 1.392894  | 0.738260  | 1.636403  |
| H | 2.347078  | 0.877103  | 3.684758  |
| H | 0.942722  | 0.673957  | 0.666420  |

#### DEC4

0 1

|   |           |           |           |
|---|-----------|-----------|-----------|
| C | 5.158334  | 0.587004  | -0.729032 |
| C | 4.893038  | 1.438422  | -1.528614 |
| H | 5.376300  | -0.175512 | -0.012091 |
| H | 4.651205  | 2.196090  | -2.239093 |
| C | 2.047539  | 0.955619  | 1.161399  |
| C | 1.152658  | 0.513803  | 1.823318  |
| H | 2.847147  | 1.340463  | 0.566695  |
| H | 0.350268  | 0.121047  | 2.405906  |
| C | -3.845548 | 0.673222  | 4.149946  |
| C | -4.217383 | 0.170786  | 3.128905  |
| H | -3.516407 | 1.113336  | 5.063148  |
| H | -4.544040 | -0.268058 | 2.210867  |
| C | -2.185318 | -0.818677 | -2.499262 |
| C | -1.452967 | -0.037474 | -3.035210 |
| H | -2.841333 | -1.505696 | -2.013569 |
| H | -0.794961 | 0.657020  | -3.507754 |
| C | 4.164124  | -2.051314 | 1.477391  |
| C | 5.266962  | -2.442069 | 1.731736  |
| H | 3.184963  | -1.692499 | 1.243245  |
| H | 6.243827  | -2.796701 | 1.966897  |
| C | -5.638305 | -0.766349 | -0.338886 |
| H | -6.334237 | -1.555571 | -0.167586 |
| C | -1.545511 | 2.180090  | 0.088686  |
| H | -0.788639 | 2.084132  | -0.660162 |
| C | -2.375852 | 2.290411  | 0.945668  |
| H | -3.104078 | 2.373376  | 1.721772  |
| C | -4.862517 | 0.123253  | -0.540547 |
| H | -4.161161 | 0.909555  | -0.720063 |
| C | -1.710707 | -1.419937 | 0.894655  |
| H | -1.902922 | -0.377033 | 0.752402  |
| C | -1.479617 | -2.584032 | 1.056767  |
| H | -1.273964 | -3.619679 | 1.203904  |
| C | 1.417284  | -1.747090 | -1.319997 |
| H | 0.414299  | -1.707001 | -0.952624 |
| C | 2.542684  | -1.787367 | -1.728762 |
| H | 3.547996  | -1.819793 | -2.082908 |
| C | 1.483611  | 1.791661  | -2.266330 |
| H | 1.749018  | 0.782328  | -2.024862 |

|   |          |          |           |
|---|----------|----------|-----------|
| C | 1.176908 | 2.919360 | -2.531180 |
| H | 0.907957 | 3.924978 | -2.762189 |

## DEC 5

0 1

|   |           |           |           |
|---|-----------|-----------|-----------|
| C | -3.916705 | -1.040678 | 0.360137  |
| C | -4.795146 | -1.833321 | 0.171442  |
| H | -3.131154 | -0.333046 | 0.525023  |
| H | -5.577843 | -2.538860 | 0.009057  |
| C | -0.485603 | -3.170957 | -2.067772 |
| C | -1.577779 | -2.722595 | -1.865720 |
| H | 0.493630  | -3.557542 | -2.238879 |
| H | -2.550046 | -2.326403 | -1.670049 |
| C | -6.831795 | 2.778136  | -0.012059 |
| C | -6.373831 | 1.679039  | 0.113543  |
| H | -7.246111 | 3.753686  | -0.125901 |
| H | -5.954224 | 0.701483  | 0.220112  |
| C | -1.765670 | 2.087649  | -0.361299 |
| C | -2.895579 | 2.441790  | -0.174179 |
| H | -0.758520 | 1.769007  | -0.532006 |
| H | -3.909171 | 2.742908  | -0.020769 |
| C | -0.294890 | -0.422591 | 1.846455  |
| C | -0.559373 | -1.499028 | 1.392489  |
| H | -0.057348 | 0.544335  | 2.234380  |
| H | -0.809270 | -2.444086 | 0.965883  |
| C | 1.897602  | 1.096518  | -1.323342 |
| C | 1.146783  | 0.169893  | -1.438307 |
| H | 2.576004  | 1.913294  | -1.220410 |
| H | 0.475407  | -0.656856 | -1.531777 |
| C | 3.080463  | -2.650605 | -0.957303 |
| C | 2.572014  | -3.362881 | -0.139663 |
| H | 3.540204  | -1.995226 | -1.665250 |
| H | 2.124607  | -3.992649 | 0.595754  |
| C | 5.518343  | 0.260906  | -2.501622 |
| C | 5.400070  | 0.125026  | -1.318006 |
| H | 5.626805  | 0.387754  | -3.554115 |
| H | 5.279130  | 0.003249  | -0.263252 |
| C | 3.496915  | -0.227737 | 1.782779  |
| C | 4.409175  | 0.202837  | 2.429418  |
| H | 2.686223  | -0.611925 | 1.199872  |
| H | 5.221614  | 0.574111  | 3.011601  |
| C | 0.479943  | 3.337216  | 1.914839  |
| C | 1.498817  | 2.756035  | 2.155500  |
| H | -0.432368 | 3.842037  | 1.690074  |
| H | 2.398676  | 2.220074  | 2.363322  |

## DEC 6

0 1

|   |          |           |           |
|---|----------|-----------|-----------|
| C | 3.160054 | -3.947271 | 0.522252  |
| C | 2.771329 | -5.079608 | 0.502263  |
| H | 3.512705 | -2.938078 | 0.541302  |
| H | 2.431883 | -6.090018 | 0.485962  |
| C | 3.051426 | 3.888497  | -1.110632 |
| C | 3.491931 | 2.799168  | -1.340241 |
| H | 2.661691 | 4.860585  | -0.911139 |
| H | 3.884401 | 1.824442  | -1.528327 |
| C | 4.657560 | -0.313853 | 0.667925  |
| C | 3.472659 | -0.257486 | 0.499294  |
| H | 5.711783 | -0.338107 | 0.829017  |

|   |           |           |           |
|---|-----------|-----------|-----------|
| H | 2.415320  | -0.189614 | 0.349794  |
| C | 0.326923  | 1.079938  | -0.566423 |
| C | -0.224028 | 0.067041  | -0.239718 |
| H | 0.826607  | 1.980166  | -0.851445 |
| H | -0.716006 | -0.836478 | 0.053191  |
| C | -4.643133 | 2.918497  | 1.824507  |
| C | -5.279271 | 2.400072  | 2.696266  |
| H | -4.072302 | 3.365564  | 1.038527  |
| H | -5.845342 | 1.945507  | 3.476645  |
| C | -1.826817 | -3.272069 | 0.688564  |
| C | -0.657814 | -3.526377 | 0.622864  |
| H | -2.867721 | -3.040843 | 0.735322  |
| H | 0.385356  | -3.755585 | 0.570834  |
| C | 7.678955  | 2.326588  | 0.950035  |
| C | 6.534559  | 2.638074  | 0.789694  |
| H | 8.700682  | 2.059060  | 1.092416  |
| H | 5.514066  | 2.915713  | 0.642806  |
| C | -3.665315 | -0.727406 | -1.024084 |
| C | -4.060370 | -0.025192 | -0.137643 |
| H | -3.316926 | -1.369893 | -1.801110 |
| H | -4.408789 | 0.609512  | 0.649044  |
| C | -4.320547 | -4.584559 | -1.509481 |
| C | -5.212273 | -3.791097 | -1.422425 |
| H | -3.522925 | -5.288397 | -1.578819 |
| H | -5.999391 | -3.076657 | -1.341307 |
| C | -2.507345 | 3.115588  | -1.173529 |
| C | -2.752464 | 4.285628  | -1.245673 |
| H | -2.288035 | 2.071672  | -1.103850 |
| H | -2.970703 | 5.326118  | -1.321658 |

## DEC 7

0 1

|   |           |           |           |
|---|-----------|-----------|-----------|
| C | 1.155365  | -3.917894 | 1.847158  |
| C | 0.488662  | -2.925470 | 1.916491  |
| H | 1.749730  | -4.800930 | 1.780288  |
| H | -0.094588 | -2.030208 | 1.964725  |
| C | 3.918928  | -3.451580 | -0.935581 |
| C | 3.394197  | -4.402230 | -1.439738 |
| H | 4.372270  | -2.596588 | -0.485215 |
| H | 2.932370  | -5.248948 | -1.893922 |
| C | 3.688027  | 0.226640  | 0.705654  |
| C | 3.191971  | -0.742988 | 1.204358  |
| H | 4.113354  | 1.096904  | 0.258707  |
| H | 2.730812  | -1.605306 | 1.637307  |
| C | 1.508338  | 3.162321  | -0.954072 |
| C | 1.352933  | 1.985412  | -1.117884 |
| H | 1.625812  | 4.214956  | -0.815879 |
| H | 1.207696  | 0.935333  | -1.256415 |
| C | -1.277465 | 0.554908  | 1.952417  |
| C | -0.097476 | 0.736218  | 1.851434  |
| H | -2.329723 | 0.394871  | 2.025168  |
| H | 0.954451  | 0.891663  | 1.748137  |
| C | -0.446979 | -1.174556 | -1.377602 |
| C | 0.590346  | -1.774348 | -1.413979 |
| H | -1.375523 | -0.647389 | -1.329274 |
| H | 1.511868  | -2.315937 | -1.434733 |
| C | -3.361711 | -4.680792 | -0.072791 |
| C | -2.299158 | -4.141113 | -0.188858 |
| H | -4.300214 | -5.174781 | 0.032246  |
| H | -1.353251 | -3.654379 | -0.293139 |
| C | -3.951087 | 0.326579  | -0.498496 |
| C | -3.919795 | -0.865465 | -0.382079 |

|   |           |           |           |
|---|-----------|-----------|-----------|
| H | -3.963582 | 1.389862  | -0.597921 |
| H | -3.876402 | -1.929270 | -0.283466 |
| C | -2.094499 | 3.450250  | -0.123015 |
| C | -3.061305 | 4.145119  | -0.258630 |
| H | -1.228536 | 2.833603  | -0.000777 |
| H | -3.923693 | 4.761674  | -0.376492 |
| C | 1.114722  | 7.073543  | -0.396760 |
| C | 0.120345  | 6.414372  | -0.299584 |
| H | 1.996740  | 7.665311  | -0.481549 |
| H | -0.763953 | 5.820638  | -0.216235 |

## DEC 8

0 1

|   |           |           |           |
|---|-----------|-----------|-----------|
| C | 0.023693  | 3.466510  | -1.484733 |
| C | -0.172924 | 2.808976  | -0.491464 |
| H | 0.201197  | 4.049527  | -2.360998 |
| H | -0.365238 | 2.223434  | 0.385764  |
| C | 4.488807  | 3.925441  | 0.826664  |
| C | 3.424537  | 3.659216  | 0.324779  |
| H | 5.426005  | 4.167761  | 1.275590  |
| H | 2.471950  | 3.437466  | -0.109733 |
| C | 6.840754  | 0.519932  | -1.754992 |
| C | 6.044166  | 1.244001  | -1.210211 |
| H | 7.546986  | -0.112687 | -2.244399 |
| H | 5.345424  | 1.896770  | -0.728304 |
| C | 4.735954  | -2.106874 | -0.013346 |
| C | 4.093650  | -3.043546 | 0.395508  |
| H | 5.309264  | -1.278109 | -0.374363 |
| H | 3.501346  | -3.860533 | 0.750077  |
| C | -3.880479 | 0.060494  | -1.633030 |
| C | -3.037263 | 0.924272  | -1.669934 |
| H | -4.630248 | -0.703176 | -1.600512 |
| H | -2.281431 | 1.681467  | -1.697129 |
| C | 1.062775  | -1.483806 | -0.795372 |
| C | -0.116755 | -1.250117 | -0.907861 |
| H | 2.106425  | -1.700277 | -0.688383 |
| H | -1.153584 | -1.013567 | -1.022852 |
| C | -6.518915 | -2.679390 | -1.877178 |
| C | -6.528241 | -2.438892 | -0.695619 |
| H | -6.516176 | -2.901373 | -2.921009 |
| H | -6.539923 | -2.232330 | 0.351515  |
| C | 0.846908  | -4.678216 | 0.909073  |
| C | 1.265270  | -5.639841 | 1.505389  |
| H | 0.490643  | -3.818401 | 0.380340  |
| H | 1.617574  | -6.497461 | 2.033179  |
| C | -4.853212 | 2.267799  | 1.375347  |
| C | -5.157909 | 2.822885  | 2.402197  |
| H | -4.574238 | 1.774258  | 0.467282  |
| H | -5.441421 | 3.318977  | 3.303223  |
| C | -0.693538 | 0.313273  | 2.200535  |
| C | -1.656985 | 1.001142  | 2.435308  |
| H | 0.142118  | -0.307748 | 1.964374  |
| H | -2.526348 | 1.595151  | 2.623089  |

## DEC 9

0 1

|   |           |          |           |
|---|-----------|----------|-----------|
| C | -0.070735 | 3.650745 | -1.780403 |
| C | -0.224718 | 2.914596 | -0.836220 |
| H | 0.069863  | 4.303739 | -2.612781 |
| H | -0.365716 | 2.260860 | 0.000584  |

|   |           |           |           |
|---|-----------|-----------|-----------|
| C | 4.346357  | 4.227992  | 0.610817  |
| C | 3.312213  | 3.900557  | 0.082831  |
| H | 5.257264  | 4.523276  | 1.081650  |
| H | 2.385039  | 3.628022  | -0.376990 |
| C | 6.951875  | 0.497870  | -1.099566 |
| C | 6.083600  | 1.273927  | -0.784240 |
| H | 7.722648  | -0.181745 | -1.387072 |
| H | 5.323222  | 1.974128  | -0.505052 |
| C | 4.539898  | -2.016528 | 0.370339  |
| C | 3.811283  | -2.933111 | 0.663846  |
| H | 5.185815  | -1.203740 | 0.109891  |
| H | 3.144294  | -3.732727 | 0.909393  |
| C | -3.669906 | 0.033541  | -1.354657 |
| C | -3.123001 | 1.044048  | -1.725295 |
| H | -4.118317 | -0.873548 | -1.011313 |
| H | -2.610203 | 1.929178  | -2.034579 |
| C | 1.125182  | -1.486795 | -1.190180 |
| C | -0.016963 | -1.146595 | -1.384885 |
| H | 2.135719  | -1.784440 | -1.000524 |
| H | -1.023291 | -0.827652 | -1.556011 |
| C | -3.305980 | -3.416984 | 0.465640  |
| C | -2.798875 | -2.452966 | 0.984850  |
| H | -3.746770 | -4.282115 | 0.023106  |
| H | -2.341463 | -1.596934 | 1.436010  |
| C | 0.510570  | -4.653227 | 0.631373  |
| C | 1.012512  | -5.603262 | 1.180109  |
| H | 0.073311  | -3.807020 | 0.144445  |
| H | 1.435389  | -6.453752 | 1.666030  |
| C | -4.512045 | 2.347986  | 1.609356  |
| C | -4.671263 | 2.875519  | 2.682513  |
| H | -4.360034 | 1.877407  | 0.660317  |
| H | -4.829917 | 3.349820  | 3.625057  |
| C | -0.362447 | 0.274337  | 1.855393  |
| C | -1.300690 | 0.925124  | 2.248308  |
| H | 0.451092  | -0.304773 | 1.475715  |
| H | -2.140590 | 1.499689  | 2.578630  |

## DEC 10

0 1

|   |           |           |           |
|---|-----------|-----------|-----------|
| C | -2.271891 | -1.172738 | -2.080760 |
| C | -1.214298 | -0.706014 | -1.764564 |
| H | -3.219321 | -1.578332 | -2.364322 |
| H | -0.274119 | -0.291891 | -1.470576 |
| C | 1.884670  | 0.979676  | 0.039766  |
| C | 1.098629  | 0.406925  | 0.737837  |
| H | 2.588991  | 1.492953  | -0.573971 |
| H | 0.389903  | -0.105769 | 1.352214  |
| C | -1.730021 | -1.145742 | 2.847517  |
| C | -1.890934 | -1.563199 | 1.736240  |
| H | -1.591086 | -0.787390 | 3.842051  |
| H | -2.040459 | -1.925921 | 0.741393  |
| C | -5.403674 | 0.715317  | -0.217727 |
| C | -4.514299 | 0.612832  | 0.578976  |
| H | -6.193120 | 0.809955  | -0.932585 |
| H | -3.716522 | 0.500682  | 1.279913  |
| C | -4.308231 | -4.107912 | -0.357374 |
| C | -4.709091 | -2.996713 | -0.160580 |
| H | -3.950960 | -5.098098 | -0.524702 |
| H | -5.050516 | -1.997605 | 0.010487  |
| C | -8.191516 | 2.145113  | -2.078533 |
| C | -8.391098 | 1.150828  | -2.716354 |
| H | -7.986254 | 3.029592  | -1.514062 |



|   |           |           |           |
|---|-----------|-----------|-----------|
| H | -8.554893 | 0.257502  | -3.275644 |
| C | -7.516537 | 4.543708  | -4.645266 |
| C | -6.922964 | 5.513914  | -5.018748 |
| H | -8.034755 | 3.673730  | -4.305290 |
| H | -6.397429 | 6.377898  | -5.355741 |
| C | -4.416043 | 2.895612  | -3.440161 |
| C | -3.638123 | 2.101630  | -2.992244 |
| H | -5.107513 | 3.612759  | -3.826986 |
| H | -2.953281 | 1.386851  | -2.588451 |
| C | -6.504377 | 5.324754  | -0.993570 |
| C | -5.809776 | 4.410581  | -0.653246 |
| H | -7.114587 | 6.141482  | -1.304925 |
| H | -5.190629 | 3.587556  | -0.368955 |
| C | -5.943103 | -1.906214 | -3.243061 |
| C | -5.647604 | -0.785490 | -3.546500 |
| H | -6.193011 | -2.903664 | -2.960457 |
| H | -5.372353 | 0.217514  | -3.796450 |

## DEC 11

0 1

|   |           |           |           |
|---|-----------|-----------|-----------|
| C | 0.038294  | 1.664626  | -0.063768 |
| C | 1.055945  | 1.267917  | -0.555205 |
| H | -0.883129 | 2.005146  | 0.357801  |
| H | 1.954395  | 0.914510  | -1.008571 |
| C | 1.200264  | -0.582225 | -3.491721 |
| C | 2.079747  | -0.027815 | -4.085387 |
| H | 0.406021  | -1.064608 | -2.963471 |
| H | 2.861569  | 0.461436  | -4.619576 |
| C | -2.159768 | -0.918318 | 2.253928  |
| C | -1.043156 | -0.526311 | 2.440382  |
| H | -3.155959 | -1.260163 | 2.065653  |
| H | -0.047857 | -0.176657 | 2.595981  |
| C | -3.466627 | 2.304936  | -0.386800 |
| C | -3.653271 | 1.920386  | 0.732948  |
| H | -3.283262 | 2.643104  | -1.383284 |
| H | -3.832585 | 1.575698  | 1.728975  |
| C | -5.714986 | -1.750099 | 1.242896  |
| C | -5.115720 | -1.519177 | 0.231756  |
| H | -6.249435 | -1.944856 | 2.144520  |
| H | -4.583199 | -1.302068 | -0.669053 |
| C | -2.320031 | 2.695803  | -4.134471 |
| C | -1.499665 | 2.141848  | -3.459621 |
| H | -3.044070 | 3.189001  | -4.742468 |
| H | -0.761372 | 1.659649  | -2.854639 |
| C | -8.395259 | 1.656761  | 0.745970  |
| C | -7.285996 | 1.562058  | 0.304256  |
| H | -9.385484 | 1.743752  | 1.130448  |
| H | -6.294709 | 1.478583  | -0.087960 |
| C | -6.136758 | 0.141715  | -2.796417 |
| C | -5.013912 | 0.461837  | -3.062673 |
| H | -7.134334 | -0.139318 | -2.544761 |
| H | -4.010905 | 0.750555  | -3.291965 |
| C | -5.689184 | 0.896298  | 3.525733  |
| C | -4.760403 | 0.600889  | 4.221810  |
| H | -6.506480 | 1.160050  | 2.888626  |
| H | -3.928538 | 0.336535  | 4.834475  |
| C | -1.838617 | -1.204291 | -1.373206 |
| C | -2.238087 | -1.596946 | -2.432512 |
| H | -1.489029 | -0.858980 | -0.423035 |
| H | -2.601614 | -1.945953 | -3.372549 |

## DEC 12

0 1

|   |           |           |           |
|---|-----------|-----------|-----------|
| C | 2.416750  | 3.022301  | 2.584205  |
| C | 2.507686  | 2.673992  | 3.726509  |
| H | 2.324253  | 3.320294  | 1.561345  |
| H | 2.587081  | 2.376581  | 4.747219  |
| C | -1.050267 | -0.155437 | 1.209615  |
| C | -0.217476 | 0.514845  | 1.751081  |
| H | -1.787547 | -0.754112 | 0.717717  |
| H | 0.516046  | 1.122386  | 2.235124  |
| C | -2.917954 | -2.883549 | -0.657910 |
| C | -2.766822 | -1.994862 | -1.447105 |
| H | -3.053095 | -3.672781 | 0.050003  |
| H | -2.622917 | -1.190896 | -2.135432 |
| C | -1.883122 | 1.581355  | -1.841520 |
| C | -2.917532 | 1.738688  | -2.425466 |
| H | -0.960438 | 1.440641  | -1.318693 |
| H | -3.840719 | 1.874792  | -2.941022 |
| C | -3.474065 | -5.369723 | 2.316928  |
| C | -2.353665 | -4.948448 | 2.293543  |
| H | -4.470838 | -5.746022 | 2.347476  |
| H | -1.354945 | -4.570390 | 2.257317  |
| C | 3.372426  | -0.958394 | 0.373837  |
| C | 3.581235  | -0.183070 | 1.262330  |
| H | 3.174306  | -1.646480 | -0.417123 |
| H | 3.757508  | 0.518151  | 2.047671  |
| C | -1.461169 | 5.269717  | -2.097437 |
| C | -0.969792 | 6.361476  | -2.106499 |
| H | -1.890432 | 4.290433  | -2.087061 |
| H | -0.544016 | 7.338471  | -2.116556 |
| C | 0.803062  | -3.178795 | 1.107270  |
| C | 0.872657  | -4.286730 | 0.656657  |
| H | 0.736788  | -2.181269 | 1.488377  |
| H | 0.937245  | -5.274043 | 0.259274  |
| C | 1.343260  | 3.290919  | -1.154556 |
| C | 1.794553  | 2.227684  | -0.833806 |
| H | 0.921936  | 4.228918  | -1.445891 |
| H | 2.193223  | 1.279075  | -0.540360 |
| C | 0.601826  | -1.432561 | -2.063300 |
| C | 1.001793  | -0.540501 | -2.755226 |
| H | 0.238258  | -2.225705 | -1.447000 |
| H | 1.350060  | 0.262489  | -3.364503 |

## DEC 13

0 1

|   |           |           |           |
|---|-----------|-----------|-----------|
| C | -3.929926 | -0.628092 | -1.730362 |
| C | -3.114600 | -1.505128 | -1.726938 |
| H | -4.651165 | 0.157159  | -1.738237 |
| H | -2.374692 | -2.276467 | -1.716921 |
| C | 1.021953  | 0.216966  | -1.327659 |
| C | -0.161646 | 0.392676  | -1.257599 |
| H | 2.075184  | 0.048844  | -1.385950 |
| H | -1.218371 | 0.538760  | -1.201021 |
| C | 4.401290  | 1.147229  | 0.282380  |
| C | 3.622947  | 2.046345  | 0.426339  |
| H | 5.081192  | 0.335801  | 0.151593  |
| H | 2.922333  | 2.842809  | 0.553502  |
| C | 0.805244  | 3.907576  | -1.059511 |
| C | 0.930503  | 5.039111  | -0.687279 |
| H | 0.696163  | 2.889751  | -1.372147 |
| H | 1.046252  | 6.047080  | -0.360453 |
| C | 4.333008  | -1.959934 | -1.853546 |
| C | 3.546976  | -2.333073 | -1.030790 |
| H | 5.029360  | -1.636748 | -2.593078 |

|   |           |           |           |
|---|-----------|-----------|-----------|
| H | 2.838046  | -2.658999 | -0.300709 |
| C | -0.173746 | -3.155953 | -0.320594 |
| C | -0.129662 | -4.199559 | -0.907062 |
| H | -0.211152 | -2.222451 | 0.198944  |
| H | -0.084377 | -5.127763 | -1.428980 |
| C | -2.621677 | 3.188328  | -0.329381 |
| C | -2.877351 | 2.228409  | 0.340056  |
| H | -2.381669 | 4.042858  | -0.920764 |
| H | -3.075637 | 1.362811  | 0.935129  |
| C | -2.526074 | -1.251706 | 1.773562  |
| C | -1.610431 | -0.602185 | 2.192403  |
| H | -3.334893 | -1.829016 | 1.386492  |
| H | -0.788470 | -0.021018 | 2.552518  |
| C | 1.050877  | 2.119536  | 3.097218  |
| C | 0.295397  | 2.492067  | 2.245506  |
| H | 1.727292  | 1.786448  | 3.851226  |
| H | -0.382672 | 2.820704  | 1.487262  |
| C | 1.657960  | -2.072428 | 2.520655  |
| C | 2.113824  | -1.071795 | 2.045281  |
| H | 1.243091  | -2.961647 | 2.937899  |
| H | 2.520726  | -0.178762 | 1.619592  |

## DEC 14

0 1

|   |           |           |           |
|---|-----------|-----------|-----------|
| C | 0.133098  | 1.341688  | 0.351361  |
| C | 1.308420  | 1.132469  | 0.454927  |
| H | -0.910010 | 1.541738  | 0.256279  |
| H | 2.361302  | 0.958040  | 0.534866  |
| C | 1.944800  | 0.636456  | -3.107754 |
| C | 2.554695  | 0.362329  | -4.101388 |
| H | 1.413008  | 0.889456  | -2.215721 |
| H | 3.095210  | 0.129745  | -4.990367 |
| C | 1.563587  | 4.391610  | 2.073718  |
| C | 1.885291  | 5.543284  | 2.141058  |
| H | 1.287796  | 3.361337  | 1.999979  |
| H | 2.185440  | 6.564381  | 2.200900  |
| C | 4.674962  | 0.407001  | -0.784699 |
| C | 5.100152  | 0.723779  | 0.290001  |
| H | 4.284991  | 0.145773  | -1.745185 |
| H | 5.462271  | 1.014797  | 1.250638  |
| C | 5.284728  | 4.274282  | 1.177707  |
| C | 6.208133  | 4.363556  | 1.935430  |
| H | 4.460784  | 4.194502  | 0.499367  |
| H | 7.033755  | 4.448811  | 2.604242  |
| C | 2.840652  | 3.580297  | -5.536978 |
| C | 3.178237  | 3.713317  | -6.678310 |
| H | 2.547615  | 3.457357  | -4.516266 |
| H | 3.467525  | 3.839405  | -7.696356 |
| C | 6.524309  | 1.786455  | -3.333087 |
| C | 5.919500  | 2.236927  | -4.263484 |
| H | 7.050112  | 1.384217  | -2.496747 |
| H | 5.367889  | 2.648038  | -5.081164 |
| C | -1.079483 | 4.803894  | -0.287821 |
| C | -1.399174 | 4.456316  | -1.387970 |
| H | -0.774172 | 5.110965  | 0.687994  |
| H | -1.685949 | 4.152692  | -2.369183 |
| C | 2.433480  | 4.034167  | -1.505379 |
| C | 3.479009  | 3.601468  | -1.901376 |
| H | 1.495264  | 4.405345  | -1.153844 |
| H | 4.405927  | 3.204184  | -2.257456 |
| C | 3.199713  | 0.891350  | 3.594007  |
| C | 3.648089  | 1.993433  | 3.458314  |
| H | 2.797757  | -0.088477 | 3.715411  |

|   |          |          |          |
|---|----------|----------|----------|
| H | 4.045851 | 2.974856 | 3.317279 |
|---|----------|----------|----------|

## DEC 15

0 1

|   |           |           |           |
|---|-----------|-----------|-----------|
| C | -0.383005 | 4.727688  | 1.844644  |
| C | -0.382027 | 3.767114  | 1.129426  |
| H | -0.396910 | 5.582206  | 2.481486  |
| H | -0.376285 | 2.911716  | 0.487745  |
| C | -5.592004 | 0.137326  | -0.223086 |
| C | -6.134285 | 0.297529  | 0.832139  |
| H | -5.097391 | -0.005023 | -1.159536 |
| H | -6.624717 | 0.438683  | 1.767937  |
| C | 3.208457  | 3.529783  | 1.057908  |
| C | 4.222255  | 3.010198  | 0.686678  |
| H | 2.293711  | 3.984125  | 1.374339  |
| H | 5.114019  | 2.535224  | 0.343523  |
| C | -2.271723 | 0.325598  | 1.204007  |
| C | -1.106088 | 0.061743  | 1.296164  |
| H | -3.312391 | 0.554011  | 1.117463  |
| H | -0.062128 | -0.161030 | 1.370855  |
| C | 2.601733  | -0.193820 | 1.542418  |
| C | 2.357607  | -1.362285 | 1.435358  |
| H | 2.827166  | 0.848389  | 1.622161  |
| H | 2.139024  | -2.404852 | 1.339663  |
| C | -2.495251 | -3.200815 | 0.304434  |
| C | -2.681926 | -4.179034 | -0.361537 |
| H | -2.328068 | -2.315603 | 0.882738  |
| H | -2.854507 | -5.054470 | -0.945660 |
| C | 0.921103  | -4.763507 | 0.749358  |
| C | 2.049274  | -5.102301 | 0.963622  |
| H | -0.087229 | -4.465693 | 0.556112  |
| H | 3.051853  | -5.411631 | 1.152096  |
| C | 5.408837  | 0.684676  | -2.168582 |
| C | 4.565163  | 0.160216  | -1.500178 |
| H | 6.157351  | 1.144137  | -2.772261 |
| H | 3.809548  | -0.302757 | -0.902331 |
| C | -3.032236 | 0.111655  | -3.125574 |
| C | -2.891117 | -0.895823 | -2.493391 |
| H | -3.148623 | 1.007796  | -3.691900 |
| H | -2.766428 | -1.793966 | -1.926667 |
| C | 0.297974  | 1.146360  | -1.669506 |
| C | 1.323615  | 1.746014  | -1.514911 |
| H | -0.617031 | 0.612737  | -1.808561 |
| H | 2.240557  | 2.273621  | -1.370066 |

## DEC16

0 1

|   |           |          |           |
|---|-----------|----------|-----------|
| C | -0.938110 | 2.179200 | 0.797943  |
| C | 0.139332  | 1.851158 | 0.388076  |
| H | -1.903646 | 2.472428 | 1.151596  |
| H | 1.103651  | 1.566729 | 0.028159  |
| C | 1.164724  | 3.060758 | -2.724310 |
| C | 1.233340  | 2.075190 | -3.401769 |
| H | 1.092252  | 3.936984 | -2.115423 |
| H | 1.281252  | 1.199952 | -4.008373 |
| C | 1.701725  | 3.246531 | 3.282604  |
| C | 2.608434  | 3.878340 | 3.745062  |
| H | 0.891661  | 2.692172 | 2.856465  |
| H | 3.412308  | 4.440372 | 4.162656  |
| C | 3.792990  | 1.910065 | -0.468124 |
| C | 3.868221  | 1.757255 | 0.717418  |
| H | 3.703927  | 2.053397 | -1.522407 |

|   |           |          |           |
|---|-----------|----------|-----------|
| H | 3.925990  | 1.631730 | 1.775363  |
| C | -3.714576 | 1.717026 | -2.916402 |
| C | -2.617498 | 1.900702 | -2.472938 |
| H | -4.690500 | 1.546155 | -3.308507 |
| H | -1.641220 | 2.068354 | -2.071625 |
| C | -2.271483 | 1.813996 | 4.463212  |
| C | -1.922658 | 2.938948 | 4.247643  |
| H | -2.573861 | 0.810308 | 4.656632  |
| H | -1.611191 | 3.939128 | 4.036223  |
| C | 2.273707  | 5.188699 | 0.104189  |
| C | 1.767028  | 6.169697 | -0.360022 |
| H | 2.725756  | 4.310904 | 0.512669  |
| H | 1.306838  | 7.037733 | -0.774409 |
| C | -1.787835 | 6.075481 | 2.341815  |
| C | -0.602444 | 5.918317 | 2.418238  |
| H | -2.843846 | 6.201086 | 2.255635  |
| H | 0.453901  | 5.767705 | 2.472131  |
| C | -1.738164 | 5.225612 | -2.370492 |
| C | -1.481074 | 5.320916 | -1.204432 |
| H | -1.966971 | 5.120788 | -3.406250 |
| H | -1.251803 | 5.396997 | -0.162862 |
| C | -4.195864 | 3.687710 | 0.483830  |
| C | -4.397928 | 3.523328 | 1.653149  |
| H | -3.995108 | 3.816612 | -0.557909 |
| H | -4.563570 | 3.362296 | 2.694460  |

## DEC 17

0 1

|   |           |           |           |
|---|-----------|-----------|-----------|
| C | 0.597204  | 0.893690  | 0.123884  |
| C | 1.743302  | 0.583182  | 0.285844  |
| H | -0.425159 | 1.169677  | -0.025508 |
| H | 2.768167  | 0.318284  | 0.416024  |
| C | 0.944188  | 2.660975  | -3.006151 |
| C | 0.119854  | 3.220817  | -3.670631 |
| H | 1.678802  | 2.160565  | -2.412848 |
| H | -0.613343 | 3.720272  | -4.261942 |
| C | 0.621531  | 2.337947  | 3.441744  |
| C | 1.147688  | 3.342110  | 3.829386  |
| H | 0.149211  | 1.448109  | 3.085410  |
| H | 1.607266  | 4.245625  | 4.161588  |
| C | 4.343463  | 2.235841  | -1.426873 |
| C | 4.727252  | 1.294088  | -2.058950 |
| H | 3.985956  | 3.074182  | -0.867877 |
| H | 5.073324  | 0.460029  | -2.625164 |
| C | -2.898941 | 0.942107  | -1.294739 |
| C | -2.185949 | 0.715509  | -2.229423 |
| H | -3.516126 | 1.148892  | -0.449787 |
| H | -1.540520 | 0.532203  | -3.058327 |
| C | -3.711657 | 4.040776  | 4.483964  |
| C | -2.517860 | 3.949299  | 4.447178  |
| H | -4.773183 | 4.130466  | 4.525667  |
| H | -1.452768 | 3.861149  | 4.395001  |
| C | 2.535110  | 5.303010  | -0.085294 |
| C | 2.055471  | 4.360722  | 0.478497  |
| H | 2.956386  | 6.143307  | -0.588947 |
| H | 1.619304  | 3.523966  | 0.982374  |
| C | -1.335681 | 3.943563  | -0.188230 |
| C | -1.863827 | 4.181191  | 0.860681  |
| H | -0.859360 | 3.728182  | -1.120736 |
| H | -2.329338 | 4.406064  | 1.794996  |
| C | -2.583048 | 0.766642  | 2.624132  |
| C | -2.170390 | -0.182204 | 2.020826  |

|   |           |           |          |
|---|-----------|-----------|----------|
| H | -2.942031 | 1.614102  | 3.167794 |
| H | -1.803787 | -1.022046 | 1.474694 |
| C | -0.467136 | 6.874141  | 3.774454 |
| C | -0.012038 | 6.465114  | 2.745134 |
| H | -0.880487 | 7.239388  | 4.686567 |
| H | 0.386370  | 6.091999  | 1.826160 |

## DEC 18

0 1

|   |           |           |           |
|---|-----------|-----------|-----------|
| C | 0.844917  | -1.335036 | 0.047246  |
| C | -0.144087 | -1.472864 | 0.710259  |
| H | 1.730395  | -1.203287 | -0.539072 |
| H | -1.023420 | -1.600011 | 1.305063  |
| C | -1.432645 | -0.952341 | -2.805596 |
| C | -1.930960 | -0.587843 | -3.832125 |
| H | -0.979276 | -1.268064 | -1.888867 |
| H | -2.370312 | -0.271747 | -4.750881 |
| C | 2.317240  | 1.483528  | 1.590806  |
| C | 3.373561  | 1.983985  | 1.851711  |
| H | 1.380269  | 1.034346  | 1.343179  |
| H | 4.312502  | 2.440031  | 2.068804  |
| C | -3.601787 | -1.655814 | 2.016941  |
| C | -3.168145 | -2.005862 | 3.077265  |
| H | -3.996704 | -1.338873 | 1.073425  |
| H | -2.780510 | -2.319581 | 4.019798  |
| C | 4.937230  | -2.719864 | 1.733488  |
| C | 4.345608  | -1.683643 | 1.834595  |
| H | 5.458568  | -3.646219 | 1.656090  |
| H | 3.818124  | -0.757243 | 1.923858  |
| C | 5.068620  | 2.869402  | -1.054533 |
| C | 5.203723  | 4.053027  | -0.934961 |
| H | 4.936674  | 1.814388  | -1.165281 |
| H | 5.330036  | 5.106400  | -0.833153 |
| C | 3.501184  | -0.204700 | -2.296213 |
| C | 4.188510  | -0.893891 | -1.597659 |
| H | 2.879603  | 0.421370  | -2.897817 |
| H | 4.784033  | -1.505488 | -0.956450 |
| C | -7.003681 | -0.620982 | 2.882154  |
| C | -8.092921 | -0.197091 | 2.624114  |
| H | -6.028848 | -0.995114 | 3.107783  |
| H | -9.067033 | 0.176526  | 2.405753  |
| C | -4.826909 | -0.405242 | -1.311694 |
| C | -5.739288 | -0.288850 | -0.544358 |
| H | -4.012474 | -0.507063 | -1.996303 |
| H | -6.542984 | -0.188868 | 0.152389  |
| C | 0.488758  | 2.046274  | -2.077521 |
| C | 1.431781  | 2.604017  | -1.593223 |
| H | -0.350378 | 1.543818  | -2.505741 |
| H | 2.276909  | 3.089452  | -1.155866 |

## DEC 19

0 1

|   |           |           |           |
|---|-----------|-----------|-----------|
| C | 1.111187  | -0.497885 | -0.890557 |
| C | 0.257322  | 0.306747  | -1.137636 |
| H | 1.866721  | -1.221464 | -0.666369 |
| H | -0.512667 | 1.021173  | -1.338742 |
| C | 3.777117  | 1.898671  | -1.337462 |
| C | 4.896254  | 2.262928  | -1.116075 |
| H | 2.776787  | 1.566280  | -1.516440 |
| H | 5.894362  | 2.586219  | -0.927707 |
| C | -2.469424 | -1.508190 | 0.144044  |

|   |           |           |           |
|---|-----------|-----------|-----------|
| C | -3.198937 | -2.163174 | -0.544394 |
| H | -1.816672 | -0.918686 | 0.753044  |
| H | -3.832244 | -2.755533 | -1.164757 |
| C | 1.372857  | 4.178994  | -0.343348 |
| C | 0.602520  | 3.558712  | 0.331857  |
| H | 2.073254  | 4.719923  | -0.937617 |
| H | -0.078655 | 2.994376  | 0.932225  |
| C | -0.234445 | -4.560911 | -2.957708 |
| C | -0.389647 | -3.488297 | -2.448338 |
| H | -0.102461 | -5.513367 | -3.417302 |
| H | -0.529585 | -2.531169 | -1.993136 |
| C | 3.041418  | -0.602563 | 2.665259  |
| C | 3.306257  | 0.273781  | 1.892812  |
| H | 2.804038  | -1.383047 | 3.352042  |
| H | 3.545146  | 1.049103  | 1.196202  |
| C | 2.761861  | -3.687744 | -0.567126 |
| C | 3.611433  | -3.126312 | 0.062899  |
| H | 1.994499  | -4.168000 | -1.134654 |
| H | 4.360424  | -2.616104 | 0.624874  |
| C | -3.048437 | 1.983399  | -0.972944 |
| C | -2.429747 | 2.984943  | -1.193856 |
| H | -3.597898 | 1.090905  | -0.767937 |
| H | -1.866265 | 3.871079  | -1.381064 |
| C | -0.438530 | 0.817073  | 2.398345  |
| C | -1.592127 | 1.139092  | 2.443006  |
| H | 0.593305  | 0.539305  | 2.347586  |
| H | -2.625974 | 1.407181  | 2.470102  |
| C | -5.415398 | 1.440483  | 1.756894  |
| C | -5.116837 | 0.281176  | 1.767083  |
| H | -5.684741 | 2.472159  | 1.744638  |
| H | -4.840285 | -0.749532 | 1.757893  |

## DEC 20

0 1

|   |           |          |           |
|---|-----------|----------|-----------|
| C | -0.274663 | 1.945110 | 1.344550  |
| C | 0.674526  | 1.327346 | 1.734308  |
| H | -1.114344 | 2.507155 | 0.996175  |
| H | 1.527087  | 0.783917 | 2.074257  |
| C | 0.926345  | 4.394264 | -6.043908 |
| C | 1.512634  | 3.650816 | -6.776415 |
| H | 0.407064  | 5.053127 | -5.382121 |
| H | 2.034818  | 2.996190 | -7.436160 |
| C | 1.566049  | 4.082993 | 3.926995  |
| C | 1.740211  | 3.700748 | 5.048854  |
| H | 1.417711  | 4.416907 | 2.920956  |
| H | 1.889255  | 3.369222 | 6.051114  |
| C | 4.597201  | 2.000122 | 1.044952  |
| C | 4.114753  | 2.380249 | 2.073730  |
| H | 5.032261  | 1.667822 | 0.126624  |
| H | 3.680886  | 2.724574 | 2.987482  |
| C | -3.197236 | 3.124900 | 4.575416  |
| C | -2.013360 | 3.061868 | 4.406555  |
| H | -4.250539 | 3.173074 | 4.731694  |
| H | -0.956121 | 3.006018 | 4.258833  |
| C | 4.984104  | 1.500033 | -2.524413 |
| C | 6.174758  | 1.391683 | -2.459892 |
| H | 3.921300  | 1.607010 | -2.577988 |
| H | 7.235228  | 1.296877 | -2.411272 |
| C | -2.656439 | 4.725089 | 1.178831  |
| C | -2.501023 | 4.901538 | 0.003979  |
| H | -2.789065 | 4.548992 | 2.224993  |
| H | -2.351421 | 5.067002 | -1.040598 |

|   |           |          |           |
|---|-----------|----------|-----------|
| C | 1.418263  | 2.406341 | -3.067346 |
| C | 1.346457  | 2.221863 | -1.884984 |
| H | 1.471658  | 2.585432 | -4.120110 |
| H | 1.260990  | 2.056938 | -0.830991 |
| C | -0.955046 | 6.465562 | -3.235930 |
| C | -0.242626 | 5.612629 | -2.788297 |
| H | -1.583548 | 7.231628 | -3.629744 |
| H | 0.392559  | 4.850231 | -2.387779 |
| C | 1.057349  | 5.521952 | 0.471398  |
| C | 2.095776  | 4.929377 | 0.395690  |
| H | 0.124344  | 6.036799 | 0.532097  |
| H | 3.016485  | 4.390034 | 0.343220  |

---

## EICO 1

0 1

|   |          |           |           |
|---|----------|-----------|-----------|
| C | 4.003288 | 4.769306  | 10.739661 |
| C | 4.991851 | 5.385470  | 11.021343 |
| H | 3.124578 | 4.222654  | 10.475621 |
| H | 5.882196 | 5.929618  | 11.251014 |
| C | 2.371399 | 8.966396  | 10.801754 |
| C | 2.420419 | 8.048350  | 11.569676 |
| H | 2.342909 | 9.783730  | 10.112753 |
| H | 2.476723 | 7.226375  | 12.246655 |
| C | 8.412986 | 7.227034  | 10.734827 |
| C | 8.188338 | 6.383343  | 9.914545  |
| H | 8.617328 | 7.987210  | 11.454209 |
| H | 7.977660 | 5.629824  | 9.184929  |
| C | 7.203601 | 3.581505  | 7.496350  |
| C | 6.736850 | 3.222372  | 8.540187  |
| H | 7.590767 | 3.915061  | 6.557731  |
| H | 6.294417 | 2.917324  | 9.462778  |
| C | 0.749266 | 4.568399  | 8.602834  |
| C | 0.955124 | 5.648050  | 9.078402  |
| H | 0.565219 | 3.609434  | 8.175025  |
| H | 1.147901 | 6.608827  | 9.504211  |
| C | 6.685641 | 9.815259  | 8.856993  |
| C | 6.446888 | 10.980325 | 8.716408  |
| H | 6.917311 | 8.778822  | 8.973285  |
| H | 6.225392 | 12.014921 | 8.586317  |
| C | 2.752732 | 3.525025  | 1.368561  |
| C | 3.644952 | 3.491153  | 2.166947  |
| H | 1.961677 | 3.555665  | 0.653996  |
| H | 4.451173 | 3.475233  | 2.868316  |
| C | 5.874494 | 0.235196  | 4.566777  |
| C | 6.285253 | 0.613994  | 5.626017  |
| H | 5.506850 | -0.112450 | 3.628093  |
| H | 6.637886 | 0.969391  | 6.570063  |
| C | 6.713278 | 6.620252  | -0.182531 |
| C | 5.861717 | 5.936391  | 0.307494  |
| H | 7.471065 | 7.234169  | -0.612772 |
| H | 5.095518 | 5.335520  | 0.745991  |
| C | 3.447820 | 1.812880  | 8.886043  |
| C | 3.297684 | 1.069374  | 9.813209  |
| H | 3.586107 | 2.480599  | 8.060561  |
| H | 3.159613 | 0.405477  | 10.635804 |
| C | 3.491838 | 7.921647  | 6.910721  |
| C | 3.692502 | 7.493053  | 8.012636  |
| H | 3.330876 | 8.309561  | 5.927016  |
| H | 3.870459 | 7.103947  | 8.992586  |
| C | 8.184431 | 9.097920  | 2.959276  |
| C | 8.262658 | 7.931247  | 2.700712  |



|   |          |           |          |
|---|----------|-----------|----------|
| H | 8.102308 | 10.134646 | 3.195841 |
| H | 8.316078 | 6.890928  | 2.465929 |
| C | 3.004661 | 11.302819 | 7.991537 |
| C | 2.165712 | 12.064946 | 8.380715 |
| H | 3.755479 | 10.620581 | 7.650872 |
| H | 1.427296 | 12.750607 | 8.729411 |
| C | 7.970439 | 7.208368  | 6.250109 |
| C | 6.851416 | 6.840304  | 6.470689 |
| H | 8.963277 | 7.538103  | 6.042883 |
| H | 5.848032 | 6.525282  | 6.666345 |
| C | 4.654833 | 7.524864  | 3.187067 |
| C | 3.769518 | 6.773728  | 3.486711 |
| H | 5.454732 | 8.181831  | 2.921957 |
| H | 2.969861 | 6.116594  | 3.754855 |
| C | 1.491609 | 9.491822  | 4.035643 |
| C | 1.267929 | 10.040869 | 5.076575 |
| H | 1.706744 | 8.993657  | 3.116722 |
| H | 1.097883 | 10.530293 | 6.010606 |
| C | 4.131162 | 3.508878  | 5.771312 |
| C | 3.429389 | 4.375711  | 6.211820 |
| H | 4.762241 | 2.731217  | 5.396916 |
| H | 2.809007 | 5.149105  | 6.612241 |
| C | 6.774090 | 4.565065  | 3.749363 |
| C | 7.373164 | 3.536395  | 3.611605 |
| H | 6.223619 | 5.474445  | 3.867465 |
| H | 7.896991 | 2.615210  | 3.495931 |
| C | 0.395419 | 6.089767  | 4.794456 |
| C | 0.641676 | 5.006121  | 4.347730 |
| H | 0.190919 | 7.060794  | 5.188466 |
| H | 0.885056 | 4.044007  | 3.955375 |
| C | 4.881732 | 10.927928 | 4.784271 |
| C | 5.669704 | 10.194703 | 5.310478 |
| H | 4.164177 | 11.568328 | 4.324101 |
| H | 6.355399 | 9.524992  | 5.783537 |

## EICO 2

0 1

|   |          |           |           |
|---|----------|-----------|-----------|
| C | 3.865470 | 4.523555  | 11.118779 |
| C | 4.921625 | 5.040873  | 11.349163 |
| H | 2.923807 | 4.074175  | 10.890331 |
| H | 5.865110 | 5.508408  | 11.527342 |
| C | 2.909731 | 8.809619  | 11.008267 |
| C | 2.837147 | 7.970926  | 11.860358 |
| H | 2.978845 | 9.552349  | 10.243233 |
| H | 2.785227 | 7.214786  | 12.609786 |
| C | 7.998284 | 7.176682  | 10.517253 |
| C | 7.718248 | 6.459970  | 9.598957  |
| H | 8.251318 | 7.825291  | 11.324947 |
| H | 7.463509 | 5.821996  | 8.778731  |
| C | 6.128036 | 4.196057  | 6.900359  |
| C | 5.720696 | 3.870808  | 7.980051  |
| H | 6.491331 | 4.473857  | 5.933392  |
| H | 5.345345 | 3.598153  | 8.942438  |
| C | 0.426757 | 4.671684  | 9.345786  |
| C | 0.884500 | 5.738359  | 9.642554  |
| H | 0.022277 | 3.721889  | 9.077850  |
| H | 1.303007 | 6.684433  | 9.914402  |
| C | 6.117612 | 9.960893  | 9.195349  |
| C | 5.825796 | 11.115920 | 9.318555  |
| H | 6.386553 | 8.931498  | 9.094497  |
| H | 5.557342 | 12.141785 | 9.428421  |
| C | 2.936119 | 3.517482  | 1.461841  |

|   |           |           |           |
|---|-----------|-----------|-----------|
| C | 4.031881  | 3.638195  | 1.930802  |
| H | 1.961675  | 3.411713  | 1.042919  |
| H | 5.010480  | 3.756717  | 2.348212  |
| C | 4.552372  | 0.869409  | 4.115307  |
| C | 4.791968  | 1.299046  | 5.207490  |
| H | 4.334074  | 0.495843  | 3.140796  |
| H | 5.005888  | 1.698779  | 6.175566  |
| C | 7.023918  | 6.387400  | 0.117870  |
| C | 5.860083  | 6.263726  | 0.372024  |
| H | 8.064961  | 6.491724  | -0.089052 |
| H | 4.829077  | 6.134535  | 0.617459  |
| C | 2.824253  | 2.022382  | 8.548566  |
| C | 3.059218  | 1.302779  | 9.476902  |
| H | 2.621846  | 2.666957  | 7.718229  |
| H | 3.270235  | 0.659463  | 10.300477 |
| C | 3.483526  | 7.729389  | 7.247486  |
| C | 3.853767  | 7.099571  | 8.198420  |
| H | 3.153227  | 8.282497  | 6.393854  |
| H | 4.168361  | 6.539121  | 9.053346  |
| C | 9.212181  | 7.957212  | 2.489695  |
| C | 9.999676  | 7.063812  | 2.616475  |
| H | 8.501273  | 8.747394  | 2.373027  |
| H | 10.694419 | 6.263364  | 2.733264  |
| C | 2.548297  | 11.211617 | 8.080087  |
| C | 1.581167  | 11.552901 | 8.699286  |
| H | 3.415643  | 10.908697 | 7.532105  |
| H | 0.724567  | 11.857131 | 9.256184  |
| C | 8.129277  | 7.697444  | 5.919141  |
| C | 6.971759  | 7.527805  | 6.178864  |
| H | 9.156181  | 7.842574  | 5.672134  |
| H | 5.938755  | 7.375683  | 6.412793  |
| C | 4.750515  | 7.521907  | 3.502481  |
| C | 4.158756  | 6.558930  | 3.902771  |
| H | 5.282779  | 8.381026  | 3.154179  |
| H | 3.627969  | 5.708909  | 4.277319  |
| C | 1.491960  | 9.020438  | 4.322001  |
| C | 1.049318  | 9.717922  | 5.189429  |
| H | 1.906797  | 8.390034  | 3.566818  |
| H | 0.671319  | 10.334067 | 5.974677  |
| C | 6.436338  | 10.641171 | 2.059001  |
| C | 6.352915  | 9.849075  | 1.164086  |
| H | 6.489395  | 11.337825 | 2.865637  |
| H | 6.277992  | 9.121412  | 0.385664  |
| C | 7.392979  | 4.629956  | 3.395456  |
| C | 7.314278  | 3.452400  | 3.604524  |
| H | 7.466849  | 5.679571  | 3.209366  |
| H | 7.221833  | 2.407217  | 3.799524  |
| C | 1.907490  | 4.607981  | 6.053081  |
| C | 2.151884  | 3.729831  | 5.274269  |
| H | 1.702355  | 5.385845  | 6.757223  |
| H | 2.394961  | 2.953386  | 4.582366  |
| C | 4.520868  | 10.923974 | 5.026510  |
| C | 5.499396  | 10.678624 | 5.673212  |
| H | 3.639150  | 11.119803 | 4.458034  |
| H | 6.361957  | 10.443852 | 6.257233  |

### EICO 3

0 1

|   |          |          |           |
|---|----------|----------|-----------|
| C | 4.162118 | 5.932192 | 10.627904 |
| C | 5.266015 | 6.231743 | 11.013961 |
| H | 3.191992 | 5.669434 | 10.262347 |
| H | 6.254660 | 6.504739 | 11.312728 |

|   |           |           |           |
|---|-----------|-----------|-----------|
| C | 1.022392  | 8.440920  | 9.767693  |
| C | 2.026691  | 8.612982  | 10.414405 |
| H | 0.150105  | 8.285268  | 9.170075  |
| H | 2.929588  | 8.741636  | 10.968699 |
| C | 8.858111  | 7.772875  | 10.432590 |
| C | 8.598854  | 6.848114  | 9.700937  |
| H | 9.103328  | 8.588151  | 11.075827 |
| H | 8.375297  | 6.021053  | 9.056352  |
| C | 8.793227  | 3.899355  | 7.471418  |
| C | 7.877598  | 3.424917  | 8.098418  |
| H | 9.597696  | 4.316226  | 6.903732  |
| H | 7.060341  | 2.997830  | 8.641051  |
| C | 1.848870  | 3.653041  | 8.867980  |
| C | 1.270509  | 4.513622  | 8.249061  |
| H | 2.388391  | 2.900031  | 9.401574  |
| H | 0.761173  | 5.269309  | 7.690350  |
| C | 5.877886  | 9.496968  | 8.802755  |
| C | 4.926524  | 10.212509 | 8.599889  |
| H | 6.719232  | 8.862996  | 8.989580  |
| H | 4.069807  | 10.821562 | 8.401775  |
| C | -0.116852 | 4.762045  | 4.376430  |
| C | 0.797056  | 3.974645  | 4.347761  |
| H | -0.917504 | 5.465364  | 4.435876  |
| H | 1.625584  | 3.300361  | 4.340014  |
| C | 4.711273  | -1.252746 | 6.879594  |
| C | 4.677899  | -0.118548 | 6.469588  |
| H | 4.741951  | -2.262047 | 7.224342  |
| H | 4.645048  | 0.890336  | 6.110500  |
| C | 6.907496  | 8.551570  | 2.228278  |
| C | 7.324877  | 7.786863  | 1.392997  |
| H | 6.529344  | 9.227462  | 2.967309  |
| H | 7.707552  | 7.105123  | 0.666986  |
| C | 4.921951  | 1.459499  | 9.684634  |
| C | 4.980236  | 2.454576  | 10.366487 |
| H | 4.875874  | 0.592790  | 9.058552  |
| H | 5.022329  | 3.356263  | 10.940557 |
| C | 3.112667  | 7.017774  | 5.704277  |
| C | 3.087178  | 7.523694  | 6.801008  |
| H | 3.146743  | 6.573970  | 4.732397  |
| H | 3.052617  | 7.967852  | 7.772886  |
| C | 11.665298 | 5.825008  | 5.476631  |
| C | 10.860952 | 5.372470  | 4.698942  |
| H | 12.388882 | 6.220660  | 6.153772  |
| H | 10.138151 | 4.972669  | 4.017744  |
| C | 1.961954  | 11.165436 | 6.668292  |
| C | 1.349245  | 11.336352 | 7.693971  |
| H | 2.512261  | 10.995217 | 5.767069  |
| H | 0.811266  | 11.472627 | 8.605062  |
| C | 7.960619  | 7.382641  | 5.794748  |
| C | 6.780136  | 7.243164  | 6.008546  |
| H | 9.008937  | 7.469889  | 5.609660  |
| H | 5.732342  | 7.129892  | 6.200307  |
| C | 3.766410  | 6.588444  | 1.905654  |
| C | 2.721709  | 6.018754  | 2.112927  |
| H | 4.700705  | 7.081067  | 1.726993  |
| H | 1.807194  | 5.507673  | 2.329800  |
| C | 0.585570  | 10.218123 | 3.574224  |
| C | 1.320096  | 9.355106  | 3.159540  |
| H | -0.057989 | 10.982548 | 3.947707  |
| H | 1.959697  | 8.581510  | 2.788583  |
| C | 4.754750  | 3.359571  | 4.920059  |
| C | 4.017223  | 3.535492  | 5.860476  |
| H | 5.438438  | 3.250063  | 4.105848  |

|   |           |           |          |
|---|-----------|-----------|----------|
| H | 3.361131  | 3.709997  | 6.689072 |
| C | 7.621746  | 4.755770  | 3.162274 |
| C | 7.944643  | 3.806235  | 2.489888 |
| H | 7.348079  | 5.597127  | 3.766727 |
| H | 8.223199  | 2.966175  | 1.893758 |
| C | -1.555837 | 7.256694  | 7.024783 |
| C | -0.607249 | 7.776515  | 6.487821 |
| H | -2.401929 | 6.802844  | 7.490587 |
| H | 0.236259  | 8.234744  | 6.014596 |
| C | 4.740102  | 11.025255 | 3.946914 |
| C | 5.202953  | 10.562558 | 4.961311 |
| H | 4.320677  | 11.431916 | 3.054032 |
| H | 5.595237  | 10.157824 | 5.871014 |

#### EICO 4

0 1

|   |           |           |           |
|---|-----------|-----------|-----------|
| C | 1.594720  | 2.176830  | 2.917653  |
| C | 2.528469  | 1.776487  | 2.265569  |
| H | 0.754154  | 2.505331  | 3.490289  |
| H | 3.359708  | 1.424132  | 1.692317  |
| C | 5.710317  | 2.493602  | 0.583227  |
| C | 5.560589  | 1.698308  | -0.313081 |
| H | 5.833559  | 3.187609  | 1.389132  |
| H | 5.443851  | 0.997838  | -1.113488 |
| C | -0.695231 | 2.970987  | 0.305799  |
| C | -1.847066 | 2.725186  | 0.575475  |
| H | 0.317986  | 3.202459  | 0.048450  |
| H | -2.854193 | 2.478287  | 0.838470  |
| C | 7.446772  | -3.316367 | 0.335300  |
| C | 7.022888  | -2.695149 | -0.607903 |
| H | 7.834663  | -3.865700 | 1.163700  |
| H | 6.640059  | -2.145692 | -1.442629 |
| C | -5.037936 | 0.866058  | 1.811564  |
| C | -4.419904 | 1.273101  | 2.765944  |
| H | -5.578415 | 0.494708  | 0.965645  |
| H | -3.858519 | 1.634716  | 3.601831  |
| C | -1.469011 | 1.563879  | 4.880843  |
| C | -1.708737 | 2.586569  | 5.475120  |
| H | -1.257911 | 0.667271  | 4.335450  |
| H | -1.912083 | 3.486364  | 6.011830  |
| C | 4.771516  | 4.354135  | 3.531897  |
| C | 5.789673  | 4.984800  | 3.677205  |
| H | 3.875252  | 3.785579  | 3.388964  |
| H | 6.684217  | 5.548613  | 3.819740  |
| C | 2.834515  | -1.697773 | 1.674429  |
| C | 3.955884  | -2.013319 | 1.355415  |
| H | 1.846445  | -1.403130 | 1.961013  |
| H | 4.948807  | -2.295545 | 1.071783  |
| C | -4.308524 | 3.224340  | -2.948788 |
| C | -5.044549 | 2.292446  | -2.733364 |
| H | -3.664940 | 4.059461  | -3.127078 |
| H | -5.684131 | 1.459736  | -2.530892 |
| C | -1.745028 | 5.562450  | -2.006464 |
| C | -1.733661 | 6.327133  | -2.940247 |
| H | -1.742484 | 4.873595  | -1.185916 |
| H | -1.729832 | 7.011348  | -3.759223 |
| C | -0.830675 | -1.539137 | 2.738330  |
| C | -0.852228 | -0.598707 | 1.980705  |
| H | -0.819786 | -2.378226 | 3.398032  |
| H | -0.877110 | 0.236510  | 1.310980  |
| C | 2.746094  | 4.088959  | -1.250819 |
| C | 1.810527  | 4.679247  | -1.733311 |

|   |           |           |           |
|---|-----------|-----------|-----------|
| H | 3.584686  | 3.568352  | -0.837540 |
| H | 0.974226  | 5.198550  | -2.150309 |
| C | -0.500890 | -2.311812 | -6.246207 |
| C | -1.001868 | -1.804531 | -5.272871 |
| H | -0.076441 | -2.748349 | -7.122384 |
| H | -1.436439 | -1.363109 | -4.399530 |
| C | -2.313848 | -0.030158 | -2.054716 |
| C | -1.850912 | -1.085223 | -1.690580 |
| H | -2.742061 | 0.903746  | -2.355597 |
| H | -1.424766 | -2.006821 | -1.350999 |
| C | 2.060000  | -2.571827 | -1.826778 |
| C | 1.598281  | -2.588399 | -2.942881 |
| H | 2.459250  | -2.538080 | -0.832997 |
| H | 1.152082  | -2.586306 | -3.915780 |
| C | 6.052515  | -0.334169 | -3.456979 |
| C | 4.977688  | -0.837695 | -3.235056 |
| H | 6.998090  | 0.112500  | -3.671072 |
| H | 4.023875  | -1.288228 | -3.044317 |
| C | -1.455488 | -4.158201 | 0.249383  |
| C | -0.646945 | -4.555744 | -0.554462 |
| H | -2.178303 | -3.808439 | 0.958771  |
| H | 0.089940  | -4.858999 | -1.265024 |
| C | -4.283659 | -7.801805 | 1.406515  |
| C | -3.450737 | -7.144010 | 0.833190  |
| H | -5.014388 | -8.398459 | 1.904853  |
| H | -2.707773 | -6.548913 | 0.344806  |
| C | -5.741415 | -1.003024 | -1.314533 |
| C | -6.922308 | -0.791265 | -1.181348 |
| H | -4.690811 | -1.168459 | -1.441956 |
| H | -7.971524 | -0.631600 | -1.068093 |
| C | -4.240627 | -2.774415 | 2.513523  |
| C | -4.342418 | -3.973647 | 2.423656  |
| H | -4.169802 | -1.709136 | 2.579131  |
| H | -4.424456 | -5.035155 | 2.320824  |

## EICO 5

0 1

|   |          |           |           |
|---|----------|-----------|-----------|
| C | 4.622980 | 4.178759  | 11.942645 |
| C | 5.647477 | 4.816179  | 11.907884 |
| H | 3.718570 | 3.611497  | 11.948028 |
| H | 6.550999 | 5.385512  | 11.838592 |
| C | 3.007125 | 8.872901  | 11.330570 |
| C | 3.509208 | 7.888502  | 11.815787 |
| H | 2.560392 | 9.733738  | 10.880261 |
| H | 3.954525 | 7.008200  | 12.227617 |
| C | 8.507301 | 7.247699  | 10.688745 |
| C | 8.050933 | 6.544920  | 9.819867  |
| H | 8.918951 | 7.879674  | 11.443532 |
| H | 7.636489 | 5.925387  | 9.051104  |
| C | 6.478723 | 3.951971  | 7.343853  |
| C | 6.144332 | 3.747220  | 8.486072  |
| H | 6.748823 | 4.115123  | 6.322217  |
| H | 5.834939 | 3.606330  | 9.499654  |
| C | 2.595365 | 1.582372  | 4.005710  |
| C | 2.603499 | 1.623007  | 5.212021  |
| H | 2.611411 | 1.576136  | 2.937327  |
| H | 2.617749 | 1.667674  | 6.280636  |
| C | 7.827996 | 10.373553 | 8.747473  |
| C | 7.985866 | 11.555623 | 8.931943  |
| H | 7.683999 | 9.326056  | 8.583084  |
| H | 8.134523 | 12.597575 | 9.106674  |
| C | 3.032797 | 3.223169  | 0.435099  |

|   |           |           |           |
|---|-----------|-----------|-----------|
| C | 3.956655  | 3.282603  | 1.209560  |
| H | 2.228981  | 3.172991  | -0.264774 |
| H | 4.773748  | 3.326422  | 1.901039  |
| C | 5.461763  | -0.624553 | 6.319087  |
| C | 5.675988  | 0.401678  | 6.916220  |
| H | 5.269205  | -1.536347 | 5.799660  |
| H | 5.863270  | 1.324446  | 7.425875  |
| C | 7.633152  | 5.975974  | 0.227180  |
| C | 6.452181  | 6.078518  | 0.453770  |
| H | 8.677802  | 5.876226  | 0.034592  |
| H | 5.406239  | 6.172245  | 0.659650  |
| C | 2.621093  | 3.087352  | 8.792480  |
| C | 2.629879  | 1.924483  | 9.117005  |
| H | 2.614169  | 4.119717  | 8.505374  |
| H | 2.638016  | 0.895385  | 9.399342  |
| C | 2.433729  | 6.560750  | 7.158465  |
| C | 2.770480  | 6.907744  | 8.265579  |
| H | 2.111210  | 6.255577  | 6.184382  |
| H | 3.048742  | 7.234121  | 9.247054  |
| C | 9.199946  | 6.993749  | 3.285124  |
| C | 10.041754 | 6.212443  | 3.656348  |
| H | 8.446245  | 7.686504  | 2.971750  |
| H | 10.791418 | 5.523968  | 3.976778  |
| C | 1.816686  | 11.029585 | 8.450246  |
| C | 0.758020  | 11.092005 | 9.026779  |
| H | 2.748865  | 10.978624 | 7.925158  |
| H | -0.176374 | 11.149327 | 9.539116  |
| C | 7.326991  | 7.511474  | 6.230165  |
| C | 6.176043  | 7.504534  | 6.595143  |
| H | 8.333264  | 7.495935  | 5.872705  |
| H | 5.153763  | 7.483853  | 6.910799  |
| C | 3.498369  | 7.860494  | 1.621207  |
| C | 2.789392  | 6.891826  | 1.751308  |
| H | 4.160286  | 8.695967  | 1.538058  |
| H | 2.169769  | 6.033370  | 1.896100  |
| C | 1.137665  | 9.314341  | 4.070496  |
| C | 0.746864  | 9.669932  | 5.156150  |
| H | 1.501279  | 8.964239  | 3.126925  |
| H | 0.436924  | 9.993718  | 6.126882  |
| C | 6.465567  | 9.769873  | 2.887250  |
| C | 6.825202  | 9.458965  | 1.777203  |
| H | 6.134981  | 10.046923 | 3.867609  |
| H | 7.138688  | 9.150102  | 0.804439  |
| C | 7.022218  | 3.655453  | 3.434581  |
| C | 6.513882  | 2.681098  | 3.935956  |
| H | 7.475318  | 4.514525  | 2.986799  |
| H | 6.069766  | 1.823489  | 4.397217  |
| C | 0.249902  | 5.846573  | 4.250407  |
| C | 0.731318  | 4.739324  | 4.263447  |
| H | -0.150579 | 6.837047  | 4.256438  |
| H | 1.160700  | 3.758584  | 4.293922  |
| C | 4.180345  | 10.837980 | 5.700605  |
| C | 5.167035  | 11.016400 | 6.374284  |
| H | 3.295679  | 10.656667 | 5.126304  |
| H | 6.039397  | 11.157469 | 6.979507  |

## EICO 6

0 1

|   |          |          |           |
|---|----------|----------|-----------|
| C | 3.388059 | 4.853993 | -1.244800 |
| C | 4.002528 | 4.811267 | -0.206784 |
| H | 2.818642 | 4.875055 | -2.148491 |

|   |           |           |           |
|---|-----------|-----------|-----------|
| H | 4.523805  | 4.743590  | 0.723324  |
| C | 5.427757  | 0.199750  | -0.829340 |
| C | 5.094517  | 1.350271  | -0.979221 |
| H | 5.730177  | -0.817664 | -0.693960 |
| H | 4.798955  | 2.371267  | -1.097323 |
| C | 4.740722  | 3.126238  | 3.353405  |
| C | 3.614012  | 2.995871  | 2.940167  |
| H | 5.734486  | 3.235777  | 3.726245  |
| H | 2.613715  | 2.889108  | 2.574250  |
| C | -0.131380 | 3.417347  | 1.642429  |
| C | 0.664488  | 4.226264  | 1.229400  |
| H | -0.852325 | 2.702521  | 1.978860  |
| H | 1.393048  | 4.909013  | 0.848121  |
| C | -4.679585 | 2.127407  | -2.780683 |
| C | -3.600379 | 2.654109  | -2.904235 |
| H | -5.620822 | 1.643182  | -2.636735 |
| H | -2.641977 | 3.119438  | -2.999527 |
| C | 5.258231  | -0.607788 | 2.876057  |
| C | 5.852236  | -1.650045 | 2.745781  |
| H | 4.744736  | 0.324192  | 2.984786  |
| H | 6.377253  | -2.566921 | 2.595902  |
| C | -6.864605 | -0.811347 | -1.174718 |
| C | -6.011881 | -0.250895 | -0.529852 |
| H | -7.622198 | -1.311949 | -1.735057 |
| H | -5.255282 | 0.249252  | 0.040684  |
| C | -3.637177 | 5.603039  | -0.932935 |
| C | -2.595321 | 5.351279  | -0.378836 |
| H | -4.555292 | 5.827473  | -1.427558 |
| H | -1.679220 | 5.103898  | 0.115638  |
| C | -7.044237 | -2.674635 | 3.754103  |
| C | -6.506809 | -2.557969 | 2.680350  |
| H | -7.538674 | -2.778133 | 4.693922  |
| H | -6.026491 | -2.456829 | 1.729988  |
| C | 0.289052  | 3.326865  | -2.705162 |
| C | -0.072381 | 4.420242  | -3.067519 |
| H | 0.603633  | 2.354838  | -2.382951 |
| H | -0.401621 | 5.386732  | -3.378220 |
| C | 0.601167  | -0.367516 | -1.778729 |
| C | 1.733912  | -0.076490 | -1.472995 |
| H | -0.396417 | -0.636773 | -2.061832 |
| H | 2.743007  | 0.171808  | -1.208405 |
| C | -2.076216 | -1.647348 | 4.062014  |
| C | -3.249183 | -1.896009 | 4.205396  |
| H | -1.042277 | -1.409074 | 3.923598  |
| H | -4.292117 | -2.117018 | 4.297677  |
| C | 5.732748  | -3.583855 | -0.395035 |
| C | 6.912139  | -3.487762 | -0.632187 |
| H | 4.687224  | -3.658315 | -0.175348 |
| H | 7.953494  | -3.413006 | -0.851977 |
| C | 1.142273  | 0.275041  | 3.616052  |
| C | 1.038386  | -0.062119 | 2.461346  |
| H | 1.241709  | 0.579226  | 4.634203  |
| H | 0.962313  | -0.364532 | 1.437822  |
| C | -3.295473 | -3.239847 | 0.891725  |
| C | -3.648122 | -2.905109 | -0.213432 |
| H | -2.983383 | -3.485017 | 1.883317  |
| H | -3.933582 | -2.587802 | -1.193058 |
| C | -0.865714 | -4.825676 | -1.598808 |
| C | 0.073227  | -4.873224 | -2.356799 |
| H | -1.701784 | -4.750042 | -0.935570 |
| H | 0.917276  | -4.879078 | -3.014076 |
| C | -3.331181 | 1.064866  | 1.778906  |
| C | -3.475779 | 2.018024  | 1.051133  |

|   |           |           |           |
|---|-----------|-----------|-----------|
| H | -3.201950 | 0.219491  | 2.423316  |
| H | -3.594158 | 2.863417  | 0.405638  |
| C | -2.247333 | -2.045445 | -3.466020 |
| C | -2.786401 | -0.964919 | -3.459503 |
| H | -1.761842 | -2.998141 | -3.443714 |
| H | -3.254793 | -0.002033 | -3.451801 |
| C | 1.944543  | -3.477735 | 0.591580  |
| C | 2.674824  | -2.958193 | 1.400678  |
| H | 1.283624  | -3.932653 | -0.116421 |
| H | 3.330088  | -2.479644 | 2.098132  |
| C | 3.203458  | -3.887623 | -4.400838 |
| C | 2.717273  | -2.975252 | -3.778898 |
| H | 3.650191  | -4.680674 | -4.957464 |
| H | 2.285466  | -2.167980 | -3.224035 |

## EICO 7

0 1

|   |           |           |           |
|---|-----------|-----------|-----------|
| C | -1.762153 | -3.090171 | 1.020188  |
| C | -2.524349 | -2.348032 | 0.448523  |
| H | -1.069713 | -3.715539 | 1.541565  |
| H | -3.205918 | -1.698408 | -0.059219 |
| C | -5.201826 | -1.767261 | -1.963717 |
| C | -4.890135 | -0.638342 | -2.258547 |
| H | -5.469480 | -2.766424 | -1.686524 |
| H | -4.633418 | 0.363967  | -2.531732 |
| C | 1.031976  | -2.485248 | -1.315931 |
| C | 2.083665  | -2.371015 | -0.732452 |
| H | 0.110146  | -2.582435 | -1.851742 |
| H | 2.997023  | -2.257235 | -0.186692 |
| C | -7.323192 | 3.091347  | 0.635522  |
| C | -6.670572 | 3.179741  | -0.375240 |
| H | -7.910309 | 3.021726  | 1.523989  |
| H | -6.087859 | 3.251428  | -1.269827 |
| C | 5.015130  | -1.600338 | 1.840428  |
| C | 4.169144  | -2.301459 | 2.341474  |
| H | 5.766573  | -0.978819 | 1.399772  |
| H | 3.415535  | -2.921919 | 2.779966  |
| C | 0.866547  | -3.377770 | 3.556134  |
| C | 1.116854  | -4.557589 | 3.603540  |
| H | 0.650413  | -2.331176 | 3.488823  |
| H | 1.333070  | -5.601042 | 3.661358  |
| C | -4.971199 | -4.947392 | -0.218677 |
| C | -5.970935 | -5.413276 | -0.707599 |
| H | -4.088186 | -4.515234 | 0.205178  |
| H | -6.851494 | -5.844134 | -1.128708 |
| C | -2.926810 | 0.963268  | 1.767638  |
| C | -4.004739 | 1.404314  | 1.446425  |
| H | -1.967148 | 0.572199  | 2.037857  |
| H | -4.957538 | 1.795642  | 1.152704  |
| C | 5.467729  | -1.426303 | -3.549462 |
| C | 6.204838  | -0.834941 | -2.798874 |
| H | 4.818651  | -1.966190 | -4.206000 |
| H | 6.845088  | -0.313873 | -2.119765 |
| C | 2.677270  | -3.573252 | -4.341176 |
| C | 2.877119  | -3.755141 | -5.517561 |
| H | 2.493170  | -3.398710 | -3.300265 |
| H | 3.054349  | -3.927563 | -6.555722 |
| C | 0.680233  | 0.409301  | 2.813940  |
| C | 0.619262  | -0.256930 | 1.808156  |
| H | 0.774019  | 1.015884  | 3.687148  |
| H | 0.581895  | -0.845332 | 0.914762  |
| C | -1.954172 | -2.470644 | -3.867843 |



|   |           |           |           |
|---|-----------|-----------|-----------|
| C | -0.916533 | -2.813968 | -4.379641 |
| H | -2.877868 | -2.160579 | -3.425543 |
| H | 0.008842  | -3.113849 | -4.823043 |
| C | 1.885714  | 5.281845  | -3.731991 |
| C | 2.274750  | 4.329611  | -3.101409 |
| H | 1.559962  | 6.123298  | -4.301387 |
| H | 2.613561  | 3.484690  | -2.537299 |
| C | 3.490873  | 1.126694  | -1.352216 |
| C | 3.035760  | 1.773543  | -0.438585 |
| H | 3.910240  | 0.533598  | -2.138418 |
| H | 2.618913  | 2.334335  | 0.373845  |
| C | -1.507761 | 3.581041  | -0.375399 |
| C | -0.775388 | 4.089338  | -1.190411 |
| H | -2.149431 | 3.104551  | 0.337280  |
| H | -0.100521 | 4.512974  | -1.905849 |
| C | -4.923894 | 2.833818  | -3.757053 |
| C | -3.956604 | 3.071307  | -3.074604 |
| H | -5.771408 | 2.626909  | -4.372301 |
| H | -3.094626 | 3.292364  | -2.477173 |
| C | 2.214341  | 3.701314  | 2.723277  |
| C | 1.364313  | 4.094893  | 1.962106  |
| H | 2.949949  | 3.323811  | 3.401028  |
| H | 0.606553  | 4.418543  | 1.280405  |
| C | 6.760253  | 1.224651  | 0.191769  |
| C | 7.856163  | 0.801885  | 0.470049  |
| H | 5.782320  | 1.580773  | -0.061994 |
| H | 8.829685  | 0.445096  | 0.723184  |
| C | 3.788018  | 0.819514  | 4.617591  |
| C | 3.603137  | 1.583662  | 5.533322  |
| H | 3.951997  | 0.129642  | 3.815318  |
| H | 3.444709  | 2.247379  | 6.353759  |
| C | -4.705949 | 0.940214  | 5.165473  |
| C | -5.106578 | 0.926863  | 6.302493  |
| H | -4.350131 | 0.953750  | 4.156689  |
| H | -5.460525 | 0.913236  | 7.308566  |

## EICO 8

0 1

|   |           |           |           |
|---|-----------|-----------|-----------|
| C | -6.267227 | 5.552069  | 3.069243  |
| C | -5.964783 | 5.541983  | 1.900708  |
| H | -6.549310 | 5.570600  | 4.098351  |
| H | -5.683696 | 5.527693  | 0.866971  |
| C | -4.698520 | 5.099545  | -1.790657 |
| C | -3.828870 | 5.308523  | -0.980018 |
| H | -5.431663 | 4.872398  | -2.532701 |
| H | -3.064215 | 5.468773  | -0.248586 |
| C | -5.637079 | 2.335055  | -4.548447 |
| C | -4.747513 | 2.245232  | -3.738816 |
| H | -6.420303 | 2.402920  | -5.269356 |
| H | -3.960287 | 2.167382  | -3.018100 |
| C | 1.220871  | -0.388065 | -2.725513 |
| C | 1.768057  | 0.673049  | -2.906223 |
| H | 0.766576  | -1.337709 | -2.540155 |
| H | 2.273436  | 1.603907  | -3.050155 |
| C | 1.737593  | 3.037612  | -0.087166 |
| C | 1.604735  | 4.104798  | -0.635044 |
| H | 1.861127  | 2.088182  | 0.392040  |
| H | 1.483820  | 5.049391  | -1.116170 |
| C | 2.884188  | -0.254302 | 1.447640  |
| C | 1.716781  | -0.500639 | 1.635745  |
| H | 3.914733  | -0.026638 | 1.278842  |
| H | 0.683190  | -0.732449 | 1.786227  |

|   |           |           |           |
|---|-----------|-----------|-----------|
| C | -1.613178 | 1.725510  | -1.372994 |
| C | -2.529018 | 2.020441  | -0.642535 |
| H | -0.788397 | 1.462572  | -2.001689 |
| H | -3.326523 | 2.271181  | 0.024423  |
| C | -2.278157 | 5.101078  | 2.289066  |
| C | -1.286640 | 4.698673  | 1.730710  |
| H | -3.172605 | 5.439201  | 2.765704  |
| H | -0.408510 | 4.334616  | 1.238994  |
| C | -4.532047 | 0.852032  | 2.322911  |
| C | -5.058461 | 1.936375  | 2.376139  |
| H | -4.049900 | -0.100011 | 2.271527  |
| H | -5.523395 | 2.897697  | 2.434235  |
| C | -5.287298 | -6.563023 | 3.188450  |
| C | -5.175631 | -6.042402 | 2.105976  |
| H | -5.402858 | -7.022126 | 4.144663  |
| H | -5.062314 | -5.580805 | 1.147280  |
| C | -3.867979 | -4.067775 | -0.916406 |
| C | -4.556124 | -4.830221 | -1.550872 |
| H | -3.262764 | -3.383625 | -0.357413 |
| H | -5.164357 | -5.498223 | -2.119354 |
| C | -1.759351 | -2.204470 | 1.555119  |
| C | -1.873133 | -1.196233 | 0.898639  |
| H | -1.646994 | -3.124766 | 2.089611  |
| H | -1.959600 | -0.296633 | 0.321736  |
| C | 4.840871  | -1.069207 | -1.701938 |
| C | 5.949050  | -1.007911 | -1.226714 |
| H | 3.856912  | -1.102916 | -2.119854 |
| H | 6.924357  | -0.952517 | -0.791736 |
| C | 5.553222  | 2.359553  | 1.813004  |
| C | 5.354936  | 2.737084  | 0.683382  |
| H | 5.716486  | 1.991572  | 2.802584  |
| H | 5.160950  | 3.069543  | -0.314704 |
| C | 6.501148  | -0.688841 | 3.505857  |
| C | 5.443527  | -0.714927 | 4.085690  |
| H | 7.427494  | -0.659854 | 2.972924  |
| H | 4.505094  | -0.750181 | 4.592525  |
| C | 9.380446  | -0.306365 | 0.726888  |
| C | 8.552851  | 0.571879  | 0.756611  |
| H | 10.126882 | -1.068566 | 0.694474  |
| H | 7.805019  | 1.338235  | 0.790320  |
| C | 4.791444  | 3.457868  | -3.231182 |
| C | 5.097266  | 2.326482  | -2.942901 |
| H | 4.534734  | 4.457564  | -3.501536 |
| H | 5.357997  | 1.323702  | -2.670857 |
| C | -1.617289 | -5.927605 | 1.927441  |
| C | -0.636958 | -5.532072 | 1.344584  |
| H | -2.501531 | -6.277444 | 2.416648  |
| H | 0.218376  | -5.171898 | 0.812291  |
| C | 1.249338  | -4.071866 | -1.509860 |
| C | 1.748082  | -3.303753 | -0.722332 |
| H | 0.793269  | -4.755319 | -2.196466 |
| H | 2.178097  | -2.607194 | -0.032643 |
| C | -1.344416 | -6.036748 | -3.144280 |
| C | -0.528974 | -6.525014 | -3.887455 |
| H | -2.071299 | -5.603336 | -2.488630 |
| H | 0.180902  | -6.966763 | -4.550530 |

## EICO 9

0 1

|   |           |           |          |
|---|-----------|-----------|----------|
| C | -1.685197 | -1.171494 | 1.436978 |
| C | -2.299329 | -0.808927 | 2.411639 |
| H | -1.151367 | -1.499412 | 0.569396 |

|   |           |           |           |
|---|-----------|-----------|-----------|
| H | -2.860764 | -0.450701 | 3.247184  |
| C | -1.022982 | 3.827324  | -3.834058 |
| C | -0.328245 | 4.221342  | -2.928962 |
| H | -1.655187 | 3.483731  | -4.624985 |
| H | 0.294902  | 4.561378  | -2.128898 |
| C | -3.341346 | -4.463765 | 0.970934  |
| C | -3.353816 | -5.563900 | 0.473641  |
| H | -3.324735 | -3.484942 | 1.405297  |
| H | -3.376469 | -6.535810 | 0.032964  |
| C | -2.771750 | 4.065434  | 0.172893  |
| C | -1.820275 | 3.541809  | 0.700176  |
| H | -3.605362 | 4.539394  | -0.296198 |
| H | -0.973568 | 3.082368  | 1.168659  |
| C | 1.371170  | 1.078013  | -2.248633 |
| C | 2.219407  | 0.437117  | -1.674572 |
| H | 0.620942  | 1.662507  | -2.739479 |
| H | 2.961124  | -0.135898 | -1.159922 |
| C | 0.030422  | -2.523958 | -1.769163 |
| C | -0.602257 | -3.447726 | -1.316005 |
| H | 0.587530  | -1.694062 | -2.152539 |
| H | -1.191520 | -4.236558 | -0.899134 |
| C | 1.267374  | 2.498812  | 2.580824  |
| C | 0.646252  | 1.465086  | 2.639789  |
| H | 1.814169  | 3.411647  | 2.491588  |
| H | 0.072509  | 0.562382  | 2.678169  |
| C | 2.384435  | 4.137297  | -0.322427 |
| C | 2.183616  | 5.284805  | -0.006327 |
| H | 2.551369  | 3.119142  | -0.606962 |
| H | 2.020768  | 6.302127  | 0.271531  |
| C | 3.110672  | -3.015167 | 0.007024  |
| C | 4.027762  | -2.400706 | 0.495559  |
| H | 2.279326  | -3.531226 | -0.422843 |
| H | 4.813246  | -1.820470 | 0.927800  |
| C | -2.515925 | -0.268856 | -2.357106 |
| C | -2.454861 | 0.833262  | -1.868311 |
| H | -2.548233 | -1.259161 | -2.753346 |
| H | -2.393722 | 1.804723  | -1.423609 |
| C | 4.421996  | -0.573150 | -4.182785 |
| C | 4.963894  | -1.643792 | -4.054782 |
| H | 3.919219  | 0.363408  | -4.277126 |
| H | 5.425213  | -2.600259 | -3.923205 |
| C | 5.375905  | 1.080013  | 0.552197  |
| C | 4.422290  | 1.093405  | 1.292773  |
| H | 6.215635  | 1.064946  | -0.112016 |
| H | 3.567269  | 1.118110  | 1.934509  |
| C | -4.825955 | 1.702443  | 4.204222  |
| C | -4.255692 | 2.120334  | 3.225244  |
| H | -5.341941 | 1.332893  | 5.066254  |
| H | -3.746187 | 2.508756  | 2.368044  |
| C | -3.816623 | 2.338971  | -6.317238 |
| C | -3.581185 | 1.732002  | -5.300743 |
| H | -4.027965 | 2.863155  | -7.222564 |
| H | -3.360069 | 1.207245  | -4.392703 |
| C | 6.312384  | -5.172148 | -3.069551 |
| C | 5.707334  | -4.627351 | -2.179247 |
| H | 6.852486  | -5.666315 | -3.845568 |
| H | 5.164638  | -4.138033 | -1.396645 |
| C | 7.589551  | 0.410918  | -2.336805 |
| C | 8.496223  | 0.896201  | -1.705587 |
| H | 6.785367  | -0.019605 | -2.898404 |
| H | 9.308851  | 1.320240  | -1.159328 |
| C | -6.919986 | 0.256588  | 7.195300  |
| C | -6.863235 | -0.496127 | 6.254184  |

|   |           |           |           |
|---|-----------|-----------|-----------|
| H | -6.981298 | 0.910464  | 8.036116  |
| H | -6.799417 | -1.147369 | 5.406850  |
| C | -6.569883 | -6.461166 | 4.171327  |
| C | -5.693014 | -6.227153 | 3.376738  |
| H | -7.340124 | -6.681880 | 4.875870  |
| H | -4.920967 | -6.006649 | 2.669485  |
| C | -6.172312 | -2.657427 | 3.134273  |
| C | -5.928812 | -1.503969 | 2.873263  |
| H | -6.377041 | -3.685289 | 3.350982  |
| H | -5.708131 | -0.478498 | 2.665347  |
| C | -8.204458 | 2.660091  | -3.735732 |
| C | -7.139367 | 2.520961  | -4.283044 |
| H | -9.146822 | 2.780481  | -3.250851 |
| H | -6.193463 | 2.396324  | -4.766058 |

## EICO 10

0 1

|   |            |           |           |
|---|------------|-----------|-----------|
| C | -2.688822  | 3.442184  | -0.069161 |
| C | -2.117912  | 3.494294  | -1.122096 |
| H | -3.215808  | 3.385817  | 0.860213  |
| H | -1.621555  | 3.513626  | -2.068926 |
| C | 1.760903   | 0.062423  | -1.278301 |
| C | 1.715385   | 1.118801  | -0.715526 |
| H | 1.802469   | -0.883313 | -1.769403 |
| H | 1.675118   | 2.052452  | -0.195894 |
| C | -2.201944  | -1.170482 | -2.105693 |
| C | -1.917583  | -0.231977 | -1.415748 |
| H | -2.474346  | -2.017521 | -2.697763 |
| H | -1.683871  | 0.601011  | -0.786963 |
| C | -5.198769  | 1.207517  | 0.035746  |
| C | -4.666101  | 0.213909  | 0.441881  |
| H | -5.673576  | 2.094834  | -0.322934 |
| H | -4.193315  | -0.681232 | 0.787850  |
| C | -7.027060  | -6.217098 | -0.301279 |
| C | -5.859961  | -6.059905 | -0.082791 |
| H | -8.068898  | -6.339039 | -0.499064 |
| H | -4.819838  | -5.903180 | 0.099659  |
| C | -6.684062  | 4.784082  | -0.301665 |
| C | -5.809043  | 4.572770  | -1.091923 |
| H | -7.455171  | 4.977379  | 0.409129  |
| H | -5.019926  | 4.360290  | -1.779962 |
| C | -8.274626  | 4.413341  | -3.814060 |
| C | -8.729699  | 4.139411  | -4.886855 |
| H | -7.860861  | 4.650046  | -2.857312 |
| H | -9.142734  | 3.901334  | -5.840243 |
| C | -5.514362  | 2.078112  | -3.800953 |
| C | -4.538718  | 1.567969  | -3.326196 |
| H | -6.386425  | 2.536537  | -4.215343 |
| H | -3.675135  | 1.101262  | -2.900462 |
| C | 1.766482   | 4.094635  | 1.744120  |
| C | 0.700180   | 4.035796  | 1.201093  |
| H | 2.714264   | 4.153706  | 2.229375  |
| H | -0.250484  | 3.974230  | 0.712381  |
| C | -7.332551  | -2.410194 | -1.286178 |
| C | -6.660509  | -1.520179 | -1.726020 |
| H | -7.937745  | -3.204879 | -0.906886 |
| H | -6.064613  | -0.719403 | -2.108082 |
| C | -8.195966  | -2.935096 | 2.587310  |
| C | -7.859470  | -4.076338 | 2.447016  |
| H | -8.481175  | -1.912296 | 2.708992  |
| H | -7.540959  | -5.085363 | 2.304019  |
| C | -10.435995 | -4.823342 | -1.314683 |

|   |            |           |           |
|---|------------|-----------|-----------|
| C | -10.305447 | -4.529875 | -0.161179 |
| H | -10.559076 | -5.077288 | -2.342995 |
| H | -10.170154 | -4.258221 | 0.862945  |
| C | 0.120514   | -2.778190 | 0.180548  |
| C | 0.799355   | -3.407529 | 0.940638  |
| H | -0.497556  | -2.208061 | -0.482579 |
| H | 1.404447   | -3.968328 | 1.615873  |
| C | -4.045788  | -4.188518 | -2.398789 |
| C | -3.109806  | -4.774550 | -2.862653 |
| H | -4.882188  | -3.665151 | -1.985012 |
| H | -2.281743  | -5.304145 | -3.274989 |
| C | -8.613105  | 1.009551  | 2.402042  |
| C | -8.158618  | 0.447022  | 1.446695  |
| H | -9.021917  | 1.511834  | 3.249032  |
| H | -7.743533  | -0.057504 | 0.599487  |
| C | -5.008831  | 2.694524  | 3.087839  |
| C | -4.131872  | 3.332287  | 3.598485  |
| H | -5.778880  | 2.111628  | 2.629944  |
| H | -3.340416  | 3.877414  | 4.065428  |
| C | -4.462290  | -3.167858 | 1.381691  |
| C | -3.264569  | -3.200811 | 1.361049  |
| H | -5.530180  | -3.129906 | 1.403784  |
| H | -2.196478  | -3.228349 | 1.346808  |
| C | -1.677741  | 0.815627  | 2.333437  |
| C | -0.661192  | 0.330387  | 1.924504  |
| H | -2.584659  | 1.244409  | 2.703466  |
| H | 0.237795   | -0.110632 | 1.553731  |
| C | -0.380321  | 1.915673  | -3.891111 |
| C | -1.254064  | 2.350361  | -4.585394 |
| H | 0.389240   | 1.521141  | -3.263066 |
| H | -2.042740  | 2.722672  | -5.199274 |
| C | -1.109228  | 3.582968  | 5.786547  |
| C | -0.592384  | 3.533051  | 4.707611  |
| H | -1.563542  | 3.616992  | 6.750073  |
| H | -0.124576  | 3.485024  | 3.747728  |

## EICO 11

0 1

|   |           |           |           |
|---|-----------|-----------|-----------|
| C | -2.482010 | 3.105471  | -3.085835 |
| C | -1.951460 | 4.061924  | -2.595204 |
| H | -2.951891 | 2.242176  | -3.507943 |
| H | -1.480119 | 4.906641  | -2.145318 |
| C | 0.992884  | 4.013179  | -0.196971 |
| C | 0.141702  | 4.394227  | 0.554996  |
| H | 1.749548  | 3.668882  | -0.865162 |
| H | -0.625511 | 4.729481  | 1.219715  |
| C | -1.977108 | -2.755262 | -2.185874 |
| C | -1.338992 | -2.076154 | -1.432575 |
| H | -2.554903 | -3.350812 | -2.856700 |
| H | -0.792311 | -1.449197 | -0.761526 |
| C | -4.891892 | 1.380413  | -1.376041 |
| C | -4.243088 | 0.372396  | -1.378706 |
| H | -5.445145 | 2.295160  | -1.375439 |
| H | -3.653333 | -0.519258 | -1.401685 |
| C | -7.131455 | -1.783999 | 0.083384  |
| C | -7.595325 | -0.679250 | 0.094848  |
| H | -6.700216 | -2.760869 | 0.062443  |
| H | -7.984560 | 0.316004  | 0.100657  |
| C | -8.492306 | 2.542221  | -2.089373 |
| C | -8.980382 | 1.507217  | -2.444477 |
| H | -8.041533 | 3.460044  | -1.777164 |
| H | -9.403459 | 0.579513  | -2.757772 |

|   |           |           |           |
|---|-----------|-----------|-----------|
| C | -6.108051 | 2.488726  | -4.891521 |
| C | -5.158111 | 2.890897  | -5.500435 |
| H | -6.953182 | 2.132036  | -4.342275 |
| H | -4.306803 | 3.239178  | -6.040336 |
| C | -3.376309 | -0.171688 | -4.837058 |
| C | -2.211076 | -0.268833 | -4.576065 |
| H | -4.417925 | -0.075858 | -5.051921 |
| H | -1.178378 | -0.356850 | -4.320369 |
| C | -3.524875 | 3.992494  | 1.849960  |
| C | -3.222592 | 3.478401  | 0.809814  |
| H | -3.806356 | 4.435528  | 2.780440  |
| H | -2.958080 | 3.016982  | -0.117302 |
| C | -7.183823 | -1.321791 | -4.658283 |
| C | -6.803698 | -0.886036 | -3.608347 |
| H | -7.522930 | -1.704052 | -5.594269 |
| H | -6.456551 | -0.493361 | -2.674032 |
| C | -1.535511 | 2.157632  | 4.370634  |
| C | -1.613259 | 2.397946  | 5.542019  |
| H | -1.483446 | 1.930382  | 3.325507  |
| H | -1.679187 | 2.604360  | 6.585898  |
| C | 0.463335  | 1.184658  | -2.375145 |
| C | 1.322556  | 0.349795  | -2.381201 |
| H | -0.307034 | 1.928324  | -2.376340 |
| H | 2.084143  | -0.396126 | -2.389525 |
| C | -5.532189 | -4.021886 | -2.311837 |
| C | -5.047862 | -4.813252 | -1.554436 |
| H | -5.970483 | -3.313161 | -2.981920 |
| H | -4.619302 | -5.514616 | -0.874882 |
| C | -3.643735 | -3.039301 | 1.173109  |
| C | -4.154188 | -2.969061 | 2.254365  |
| H | -3.178233 | -3.089185 | 0.211968  |
| H | -4.605358 | -2.889558 | 3.217066  |
| C | -0.851101 | 0.800463  | 0.941896  |
| C | -1.778810 | 0.155745  | 1.343334  |
| H | -0.039076 | 1.393880  | 0.582569  |
| H | -2.612083 | -0.409320 | 1.705205  |
| C | -5.681471 | 4.899496  | -2.217168 |
| C | -5.869593 | 5.109708  | -1.052778 |
| H | -5.504506 | 4.692212  | -3.250225 |
| H | -6.023637 | 5.285237  | -0.011903 |
| C | -1.629964 | 6.882570  | 3.589842  |
| C | -1.403293 | 5.781810  | 4.003125  |
| H | -1.826378 | 7.862812  | 3.220072  |
| H | -1.213857 | 4.792648  | 4.362652  |
| C | -8.060634 | 3.038658  | 1.417971  |
| C | -6.886238 | 2.799536  | 1.411968  |
| H | -9.106221 | 3.247604  | 1.418133  |
| H | -5.835677 | 2.593576  | 1.414305  |
| C | -5.657335 | 4.003070  | 4.740110  |
| C | -4.879393 | 4.771783  | 5.227905  |
| H | -6.342706 | 3.317342  | 4.291936  |
| H | -4.184364 | 5.462232  | 5.649437  |
| C | -5.315862 | 0.145520  | 2.847955  |
| C | -4.665386 | 0.696425  | 3.690541  |
| H | -5.889342 | -0.339093 | 2.085333  |
| H | -4.076630 | 1.198017  | 4.427298  |

## EICO 12

0 1

|   |          |          |          |
|---|----------|----------|----------|
| C | 1.299849 | 1.292583 | 2.022093 |
| C | 1.837207 | 0.527938 | 2.773252 |
| H | 0.815646 | 1.973042 | 1.352924 |

|   |           |           |           |
|---|-----------|-----------|-----------|
| H | 2.326806  | -0.150717 | 3.437732  |
| C | -2.239190 | 0.046250  | 0.114861  |
| C | -1.552836 | -0.162131 | 1.074485  |
| H | -2.867830 | 0.213506  | -0.730758 |
| H | -0.930528 | -0.349938 | 1.922959  |
| C | -5.424034 | -1.723784 | -0.821078 |
| C | -5.741578 | -0.680837 | -0.325145 |
| H | -5.132342 | -2.655604 | -1.251180 |
| H | -6.008583 | 0.250224  | 0.124294  |
| C | -4.682715 | 1.785350  | 2.091164  |
| C | -5.031465 | 2.783154  | 1.527852  |
| H | -4.373152 | 0.890236  | 2.586796  |
| H | -5.336889 | 3.677156  | 1.033558  |
| C | -3.082842 | -4.300897 | 0.286871  |
| C | -2.208006 | -3.567515 | -0.079715 |
| H | -3.880331 | -4.931666 | 0.614958  |
| H | -1.417905 | -2.915481 | -0.389491 |
| C | 4.590119  | -1.083508 | -0.311933 |
| C | 4.871669  | 0.037339  | 0.006315  |
| H | 4.327136  | -2.084434 | -0.577177 |
| H | 5.105267  | 1.043323  | 0.282779  |
| C | -1.381512 | 3.636310  | 0.858659  |
| C | -0.508189 | 4.384060  | 0.520398  |
| H | -2.158518 | 2.967580  | 1.161518  |
| H | 0.274083  | 5.043643  | 0.211630  |
| C | 1.216972  | -1.934110 | -0.383764 |
| C | 1.177481  | -2.797510 | -1.214662 |
| H | 1.258415  | -1.154481 | 0.346721  |
| H | 1.127359  | -3.562328 | -1.960720 |
| C | 0.805221  | 1.900640  | -1.703301 |
| C | 1.832201  | 1.287799  | -1.632624 |
| H | -0.109716 | 2.447828  | -1.743893 |
| H | 2.736045  | 0.722913  | -1.554013 |
| C | 3.566417  | -4.484907 | 0.895417  |
| C | 4.746957  | -4.653303 | 0.773998  |
| H | 2.511215  | -4.344995 | 0.988663  |
| H | 5.795596  | -4.820307 | 0.655764  |
| C | 0.239955  | -6.226543 | 0.516004  |
| C | 1.094215  | -7.048265 | 0.341836  |
| H | -0.524406 | -5.494762 | 0.669248  |
| H | 1.860394  | -7.773982 | 0.186325  |
| C | 0.307469  | -5.747289 | -3.171631 |
| C | 0.283067  | -5.054676 | -4.148078 |
| H | 0.335578  | -6.351588 | -2.290565 |
| H | 0.261313  | -4.442885 | -5.020691 |
| C | 3.705764  | -6.770160 | -1.983057 |
| C | 3.763888  | -7.648779 | -2.794930 |
| H | 3.660626  | -5.990304 | -1.251747 |
| H | 3.805581  | -8.423873 | -3.525692 |
| C | -0.463803 | -3.055506 | 3.029803  |
| C | 0.728406  | -2.987667 | 3.128849  |
| H | -1.526878 | -3.114391 | 2.942060  |
| H | 1.791394  | -2.928232 | 3.227067  |
| C | -4.359610 | -1.837849 | 3.878245  |
| C | -4.092094 | -1.835524 | 2.710140  |
| H | -4.596341 | -1.843121 | 4.917715  |
| H | -3.847963 | -1.829019 | 1.668957  |
| C | 4.172861  | 3.242196  | 1.490282  |
| C | 4.763347  | 3.919341  | 0.698455  |
| H | 3.627571  | 2.635546  | 2.180370  |
| H | 5.272021  | 4.537861  | -0.005663 |
| C | -6.660889 | -5.538990 | 1.096413  |
| C | -6.449820 | -4.438514 | 1.518030  |

|   |           |           |           |
|---|-----------|-----------|-----------|
| H | -6.859735 | -6.517885 | 0.724458  |
| H | -6.255773 | -3.457876 | 1.894045  |
| C | 2.385738  | 5.166660  | -1.535514 |
| C | 2.387935  | 6.360029  | -1.435338 |
| H | 2.372538  | 4.100152  | -1.615874 |
| H | 2.394171  | 7.422487  | -1.349705 |
| C | 7.240623  | -6.359571 | -1.211089 |
| C | 8.200899  | -5.895103 | -0.667582 |
| H | 6.380635  | -6.770815 | -1.694586 |
| H | 9.062612  | -5.486910 | -0.191093 |
| C | 4.401643  | -1.837961 | 3.330117  |
| C | 4.158620  | -2.174258 | 4.453907  |
| H | 4.614960  | -1.533543 | 2.326680  |
| H | 3.953401  | -2.482434 | 5.453753  |

### EICO 13

0 1

|   |           |           |           |
|---|-----------|-----------|-----------|
| C | 5.984653  | 0.842480  | -0.860939 |
| C | 6.324670  | 1.549598  | 0.044664  |
| H | 5.683565  | 0.222051  | -1.678376 |
| H | 6.633122  | 2.180302  | 0.847283  |
| C | 2.600829  | 4.204047  | 0.873791  |
| C | 3.175023  | 3.338357  | 1.470686  |
| H | 2.079002  | 4.958908  | 0.325746  |
| H | 3.657960  | 2.553412  | 2.008274  |
| C | 0.098198  | 5.312589  | -1.602875 |
| C | 1.117651  | 5.666385  | -2.123466 |
| H | -0.815133 | 4.979781  | -1.157880 |
| H | 2.017853  | 5.966165  | -2.614341 |
| C | 3.369687  | 2.570025  | -2.362872 |
| C | 3.549164  | 2.204483  | -3.490645 |
| H | 3.204066  | 2.875305  | -1.351395 |
| H | 3.698813  | 1.861912  | -4.492351 |
| C | -3.189394 | 3.328160  | -1.185132 |
| C | -2.570054 | 3.059735  | -0.194542 |
| H | -3.735070 | 3.550193  | -2.075614 |
| H | -2.013783 | 2.805742  | 0.684194  |
| C | -0.177305 | 2.080532  | 2.408844  |
| C | -1.131964 | 1.762517  | 3.060342  |
| H | 0.672148  | 2.368302  | 1.826251  |
| H | -1.985439 | 1.493875  | 3.644347  |
| C | 3.044915  | -1.169118 | -1.955479 |
| C | 3.431707  | -2.218975 | -1.525648 |
| H | 2.697527  | -0.225980 | -2.321801 |
| H | 3.755983  | -3.152510 | -1.122940 |
| C | 3.248704  | -3.893765 | 1.623531  |
| C | 3.080567  | -5.021596 | 1.257815  |
| H | 3.380583  | -2.881217 | 1.940970  |
| H | 2.932717  | -6.028857 | 0.941635  |
| C | 0.314766  | 1.606088  | -1.550500 |
| C | 0.467647  | 0.744275  | -0.730731 |
| H | 0.187480  | 2.368060  | -2.289501 |
| H | 0.597700  | -0.031583 | -0.006526 |
| C | -1.112125 | -1.808426 | 1.295911  |
| C | -0.139568 | -2.489046 | 1.132945  |
| H | -1.984480 | -1.205726 | 1.431754  |
| H | 0.725355  | -3.097771 | 0.983960  |
| C | 2.399739  | -0.301178 | 2.380954  |
| C | 3.315365  | -0.205980 | 1.613369  |
| H | 1.562334  | -0.378468 | 3.038841  |
| H | 4.122747  | -0.110381 | 0.918828  |
| C | 5.637934  | -0.786188 | -4.335607 |



|   |           |           |           |
|---|-----------|-----------|-----------|
| C | 6.412213  | 0.108474  | -4.522205 |
| H | 4.936065  | -1.569006 | -4.151024 |
| H | 7.089964  | 0.918554  | -4.677176 |
| C | -3.801251 | -1.064352 | -1.929634 |
| C | -2.747381 | -0.500264 | -1.847190 |
| H | -4.734331 | -1.576342 | -1.992154 |
| H | -1.803971 | -0.000782 | -1.757813 |
| C | 3.826362  | 5.460717  | -4.798069 |
| C | 2.946827  | 6.098913  | -5.302254 |
| H | 4.612192  | 4.887963  | -4.353059 |
| H | 2.162794  | 6.663375  | -5.753701 |
| C | -4.271657 | 1.830864  | -4.254520 |
| C | -4.546084 | 2.773772  | -4.940502 |
| H | -4.022365 | 0.993496  | -3.635698 |
| H | -4.795203 | 3.608177  | -5.555735 |
| C | 3.299325  | 0.386872  | -6.797732 |
| C | 2.231394  | 0.865953  | -6.544436 |
| H | 4.252934  | -0.040651 | -7.009310 |
| H | 1.285813  | 1.302764  | -6.305822 |
| C | -4.295512 | 0.328604  | 1.389514  |
| C | -4.467337 | -0.278352 | 2.407858  |
| H | -4.133538 | 0.859063  | 0.475956  |
| H | -4.621203 | -0.811154 | 3.318692  |
| C | 6.862597  | 3.481318  | -3.377769 |
| C | 7.296416  | 4.049223  | -4.339201 |
| H | 6.471193  | 2.967945  | -2.525234 |
| H | 7.683268  | 4.561377  | -5.190548 |
| C | -4.378016 | 1.975747  | 4.948610  |
| C | -3.772853 | 1.699205  | 5.943560  |
| H | -4.909779 | 2.213387  | 4.054870  |
| H | -3.237506 | 1.461489  | 6.834162  |
| C | -0.755182 | 2.949693  | -4.977567 |
| C | 0.339708  | 3.419141  | -4.847027 |
| H | -1.739981 | 2.548586  | -5.082031 |
| H | 1.315475  | 3.836968  | -4.719778 |

#### EICO 14

0 1

|   |          |           |           |
|---|----------|-----------|-----------|
| C | 1.405885 | 2.545698  | 0.461805  |
| C | 1.996962 | 2.197394  | 1.444538  |
| H | 0.900581 | 2.855187  | -0.427631 |
| H | 2.531795 | 1.889353  | 2.316813  |
| C | 2.710971 | 1.244359  | -2.603565 |
| C | 2.152775 | 0.191384  | -2.730619 |
| H | 3.211501 | 2.182854  | -2.473329 |
| H | 1.657120 | -0.747009 | -2.832189 |
| C | 0.935278 | 5.133816  | 3.176774  |
| C | 1.010671 | 6.006191  | 3.994021  |
| H | 0.881593 | 4.353886  | 2.446086  |
| H | 1.072216 | 6.790867  | 4.713073  |
| C | 5.164275 | 1.153544  | 0.340199  |
| C | 5.664868 | 1.805624  | 1.212167  |
| H | 4.712306 | 0.601522  | -0.454596 |
| H | 6.106970 | 2.393924  | 1.987257  |
| C | 2.901248 | 2.621228  | 5.000135  |
| C | 3.955731 | 2.082627  | 4.817145  |
| H | 1.964555 | 3.108860  | 5.155162  |
| H | 4.894218 | 1.594742  | 4.662488  |
| C | 3.808733 | 0.763324  | -6.093077 |
| C | 4.678172 | 0.715048  | -6.915514 |
| H | 3.052575 | 0.805154  | -5.339224 |
| H | 5.464326 | 0.684286  | -7.635673 |

|   |           |           |           |
|---|-----------|-----------|-----------|
| C | 6.688489  | 1.983679  | -2.709492 |
| C | 6.252578  | 1.216436  | -3.520551 |
| H | 7.058501  | 2.663667  | -1.972182 |
| H | 5.852094  | 0.548222  | -4.250163 |
| C | 2.463855  | 7.283521  | 0.292973  |
| C | 2.115537  | 7.988016  | -0.612022 |
| H | 2.782257  | 6.669418  | 1.108127  |
| H | 1.816338  | 8.609644  | -1.426941 |
| C | 4.167764  | 4.237653  | -1.075365 |
| C | 4.339448  | 4.534494  | -2.224118 |
| H | 4.017287  | 3.950800  | -0.057473 |
| H | 4.494576  | 4.787257  | -3.251642 |
| C | 5.285949  | 5.588299  | 1.967336  |
| C | 4.534406  | 5.182964  | 2.808577  |
| H | 5.965072  | 5.918586  | 1.211998  |
| H | 3.866082  | 4.811978  | 3.554345  |
| C | 7.821253  | 2.463471  | -6.535185 |
| C | 7.815696  | 2.713450  | -7.706314 |
| H | 7.821055  | 2.256204  | -5.486119 |
| H | 7.820511  | 2.946328  | -8.746369 |
| C | 7.770455  | 4.958380  | -0.618017 |
| C | 8.226387  | 4.318370  | 0.286874  |
| H | 7.355183  | 5.521824  | -1.426332 |
| H | 8.619071  | 3.751707  | 1.102042  |
| C | 0.304186  | 4.036703  | -2.965376 |
| C | 0.791808  | 4.859789  | -2.244153 |
| H | -0.123370 | 3.296867  | -3.603016 |
| H | 1.240979  | 5.589849  | -1.603388 |
| C | 5.439391  | 7.645449  | -2.188766 |
| C | 6.444921  | 7.876058  | -2.799369 |
| H | 4.541965  | 7.432127  | -1.645783 |
| H | 7.344801  | 8.054810  | -3.343769 |
| C | 2.447574  | 8.582394  | -4.279706 |
| C | 1.940882  | 7.496998  | -4.302287 |
| H | 2.894336  | 9.551146  | -4.236274 |
| H | 1.494640  | 6.526383  | -4.315183 |
| C | 6.485493  | -0.960624 | 4.747929  |
| C | 6.254082  | -0.704315 | 3.601235  |
| H | 6.685367  | -1.197912 | 5.767851  |
| H | 6.041077  | -0.460345 | 2.582260  |
| C | 4.082701  | 10.979045 | -2.158060 |
| C | 3.191097  | 11.768776 | -2.280274 |
| H | 4.871912  | 10.265943 | -2.054532 |
| H | 2.401374  | 12.477631 | -2.380814 |
| C | 8.066584  | 5.210783  | -4.436683 |
| C | 9.070349  | 5.199829  | -3.783288 |
| H | 7.169146  | 5.209697  | -5.018267 |
| H | 9.958714  | 5.179915  | -3.194278 |
| C | 7.579957  | 3.544004  | 3.949071  |
| C | 8.022183  | 2.430973  | 3.974213  |
| H | 7.167522  | 4.528189  | 3.916095  |
| H | 8.396735  | 1.432370  | 4.003016  |
| C | 4.540487  | 5.621727  | -5.703394 |
| C | 4.727380  | 4.461433  | -5.939688 |
| H | 4.352184  | 6.648810  | -5.477553 |
| H | 4.890138  | 3.425913  | -6.151425 |

## EICO 15

0 1

|   |           |           |          |
|---|-----------|-----------|----------|
| C | -0.428681 | -0.946221 | 2.362900 |
| C | 0.528777  | -0.437924 | 1.852612 |
| H | -1.275528 | -1.403476 | 2.821780 |

|   |           |           |            |
|---|-----------|-----------|------------|
| H | 1.380359  | 0.010373  | 1.385283   |
| C | 3.078901  | 1.040716  | -4.408574  |
| C | 3.533288  | 0.479555  | -3.452440  |
| H | 2.684752  | 1.554478  | -5.256278  |
| H | 3.926086  | 0.001917  | -2.580205  |
| C | -0.060569 | 2.956706  | 3.210887   |
| C | 0.242771  | 4.101131  | 3.396290   |
| H | -0.321994 | 1.937832  | 3.023717   |
| H | 0.523735  | 5.119612  | 3.559691   |
| C | 1.198041  | 1.857582  | -0.954979  |
| C | 1.256479  | 2.711192  | -0.114925  |
| H | 1.153578  | 1.082986  | -1.690195  |
| H | 1.315647  | 3.458305  | 0.646960   |
| C | 3.695546  | 2.880922  | 2.993318   |
| C | 4.284286  | 3.314894  | 2.043201   |
| H | 3.167046  | 2.519655  | 3.847757   |
| H | 4.798954  | 3.706939  | 1.191827   |
| C | 4.944281  | 7.369280  | -2.808346  |
| C | 5.764984  | 6.592689  | -3.206157  |
| H | 4.213329  | 8.056989  | -2.447600  |
| H | 6.502515  | 5.900195  | -3.549879  |
| C | 6.540514  | 5.987514  | 0.404538   |
| C | 7.182144  | 5.800420  | 1.399222   |
| H | 5.960268  | 6.155686  | -0.478216  |
| H | 7.733729  | 5.644846  | 2.298838   |
| C | 1.656790  | 7.579234  | 3.785935   |
| C | 2.461371  | 6.961446  | 4.423825   |
| H | 0.932767  | 8.113542  | 3.211482   |
| H | 3.175801  | 6.409842  | 4.995620   |
| C | 1.595003  | 4.299465  | -3.575791  |
| C | 2.571137  | 4.777401  | -4.080027  |
| H | 0.736881  | 3.868215  | -3.110257  |
| H | 3.448241  | 5.200853  | -4.518014  |
| C | 2.806855  | 5.885873  | -0.489787  |
| C | 2.999205  | 6.196553  | 0.652315   |
| H | 2.645729  | 5.596197  | -1.507479  |
| H | 3.164869  | 6.466969  | 1.673467   |
| C | 6.326099  | 6.190300  | 5.368860   |
| C | 5.833065  | 5.364760  | 4.654391   |
| H | 6.764541  | 6.930085  | 5.998851   |
| H | 5.383364  | 4.633948  | 4.013690   |
| C | 0.259794  | -1.585308 | -1.575664  |
| C | 0.764813  | -1.576833 | -2.661595  |
| H | -0.179707 | -1.577696 | -0.602109  |
| H | 1.221157  | -1.553714 | -3.625490  |
| C | 4.685350  | 2.938870  | -1.448828  |
| C | 5.876819  | 3.031218  | -1.351757  |
| H | 3.621675  | 2.849668  | -1.522762  |
| H | 6.937355  | 3.131368  | -1.280992  |
| C | 4.988327  | 0.486051  | -7.425056  |
| C | 4.625457  | -0.119689 | -8.392211  |
| H | 5.309956  | 1.033553  | -6.565255  |
| H | 4.300049  | -0.667508 | -9.246782  |
| C | 6.151904  | 3.240680  | -9.591363  |
| C | 6.565469  | 4.313809  | -9.924304  |
| H | 5.781300  | 2.285441  | -9.285503  |
| H | 6.930780  | 5.266539  | -10.232531 |
| C | 6.116741  | 3.724751  | -6.045575  |
| C | 5.812945  | 3.336099  | -4.952566  |
| H | 6.373258  | 4.055273  | -7.029191  |
| H | 5.533558  | 2.998977  | -3.975648  |
| C | 2.245370  | 3.747866  | 6.313222   |
| C | 3.385056  | 3.856305  | 6.664220   |

|   |           |           |           |
|---|-----------|-----------|-----------|
| H | 1.234927  | 3.649426  | 5.983313  |
| H | 4.401537  | 3.962546  | 6.968662  |
| C | -1.542146 | 7.224207  | 1.596162  |
| C | -0.527135 | 6.943702  | 1.026402  |
| H | -2.451887 | 7.464856  | 2.096651  |
| H | 0.384179  | 6.690033  | 0.527959  |
| C | 8.860725  | 4.295449  | -3.198489 |
| C | 8.872050  | 4.953728  | -2.197949 |
| H | 8.838787  | 3.714023  | -4.092789 |
| H | 8.863627  | 5.537040  | -1.303316 |
| C | 3.568499  | -1.164557 | -0.119292 |
| C | 4.047115  | -0.147843 | 0.295895  |
| H | 3.125126  | -2.060323 | -0.492073 |
| H | 4.461660  | 0.763051  | 0.669419  |

## EICO 16

0 1

|   |           |           |           |
|---|-----------|-----------|-----------|
| C | 0.367803  | 2.535481  | -0.458241 |
| C | 1.466129  | 2.358094  | -0.011607 |
| H | -0.615611 | 2.692358  | -0.845104 |
| H | 2.444853  | 2.197920  | 0.387490  |
| C | 1.429784  | 1.221463  | -3.508862 |
| C | 1.281749  | 0.040105  | -3.641423 |
| H | 1.575296  | 2.270976  | -3.367356 |
| H | 1.155004  | -1.013878 | -3.742028 |
| C | 0.277541  | 3.396462  | 3.161908  |
| C | 0.809189  | 4.111324  | 3.963766  |
| H | -0.183634 | 2.756726  | 2.439822  |
| H | 1.281080  | 4.768001  | 4.660690  |
| C | 4.364994  | 0.963115  | -1.372130 |
| C | 5.202747  | 1.563902  | -0.761129 |
| H | 3.594859  | 0.437663  | -1.896169 |
| H | 5.929717  | 2.109638  | -0.202870 |
| C | -3.186518 | 1.514204  | -1.869883 |
| C | -2.217790 | 1.165187  | -2.482734 |
| H | -4.047488 | 1.822205  | -1.317911 |
| H | -1.342312 | 0.870284  | -3.021158 |
| C | -3.585886 | 2.363650  | 4.475217  |
| C | -2.927416 | 3.363352  | 4.424070  |
| H | -4.181575 | 1.479587  | 4.501323  |
| H | -2.338093 | 4.252151  | 4.353094  |
| C | 0.846054  | 7.189348  | 0.341240  |
| C | 0.879449  | 5.999652  | 0.483249  |
| H | 0.821727  | 8.249879  | 0.232982  |
| H | 0.911856  | 4.936653  | 0.608337  |
| C | -2.363859 | 4.703447  | 0.594879  |
| C | -2.665066 | 3.620064  | 1.009372  |
| H | -2.075663 | 5.668616  | 0.242505  |
| H | -2.932818 | 2.660767  | 1.398592  |
| C | -1.259710 | 0.009702  | 2.247816  |
| C | -1.571596 | 0.108085  | 1.094700  |
| H | -0.966424 | -0.071364 | 3.273320  |
| H | -1.844990 | 0.206316  | 0.065819  |
| C | 2.115855  | 7.645620  | 4.514309  |
| C | 2.584887  | 7.041293  | 3.591929  |
| H | 1.689883  | 8.177766  | 5.336834  |
| H | 2.998397  | 6.490735  | 2.774394  |
| C | -6.621529 | 5.510686  | 2.930357  |
| C | -5.525107 | 5.258902  | 2.519182  |
| H | -7.596155 | 5.736376  | 3.298060  |
| H | -4.547668 | 5.027733  | 2.149873  |
| C | 4.105216  | 4.559174  | 0.921997  |

|   |           |           |           |
|---|-----------|-----------|-----------|
| C | 4.211449  | 4.007973  | 1.980410  |
| H | 3.991130  | 5.025059  | -0.032728 |
| H | 4.296940  | 3.498660  | 2.914003  |
| C | 2.687747  | 0.815773  | 3.117979  |
| C | 3.362059  | 0.025381  | 2.520303  |
| H | 2.073920  | 1.515286  | 3.643647  |
| H | 3.950228  | -0.687810 | 1.984434  |
| C | 2.396937  | -2.214378 | -0.638980 |
| C | 1.693345  | -1.311089 | -0.286718 |
| H | 3.034168  | -3.017744 | -0.930434 |
| H | 1.076106  | -0.502536 | 0.042445  |
| C | 2.611534  | 4.999159  | -2.523293 |
| C | 3.515712  | 4.259291  | -2.786879 |
| H | 1.811250  | 5.656343  | -2.264082 |
| H | 4.314805  | 3.586332  | -3.003909 |
| C | 5.781918  | -1.947477 | 0.402031  |
| C | 5.867405  | -2.889562 | 1.136043  |
| H | 5.691867  | -1.097823 | -0.240465 |
| H | 5.948485  | -3.727593 | 1.789632  |
| C | -2.636653 | 7.017728  | 3.696874  |
| C | -1.490631 | 6.876856  | 3.374853  |
| H | -3.663458 | 7.127801  | 3.967200  |
| H | -0.469627 | 6.750365  | 3.081472  |
| C | -0.392026 | 0.840126  | 5.679283  |
| C | 0.425895  | -0.034588 | 5.656226  |
| H | -1.124426 | 1.618635  | 5.678110  |
| H | 1.164624  | -0.803117 | 5.626916  |
| C | -0.655046 | 8.274245  | 6.703897  |
| C | -0.037797 | 8.669394  | 7.650644  |
| H | -1.198455 | 7.920268  | 5.853635  |
| H | 0.503618  | 9.019501  | 8.499365  |
| C | -5.637094 | 1.715000  | 1.562554  |
| C | -5.100011 | 0.660432  | 1.377217  |
| H | -6.103678 | 2.659345  | 1.742980  |
| H | -4.612070 | -0.276001 | 1.225677  |

## EICO 17

0 1

|   |           |           |           |
|---|-----------|-----------|-----------|
| C | 1.132982  | -2.989334 | -1.535512 |
| C | 0.700581  | -1.871817 | -1.488460 |
| H | 1.529021  | -3.983098 | -1.568267 |
| H | 0.329960  | -0.869496 | -1.438097 |
| C | -2.414684 | -3.810391 | -1.615345 |
| C | -3.519930 | -4.225029 | -1.406263 |
| H | -1.427592 | -3.432309 | -1.785002 |
| H | -4.512425 | -4.574169 | -1.216682 |
| C | 1.076232  | -2.823645 | 2.190416  |
| C | 1.998891  | -3.136096 | 2.888271  |
| H | 0.251545  | -2.535969 | 1.573593  |
| H | 2.823953  | -3.405603 | 3.508464  |
| C | -2.193828 | -1.120700 | 0.771364  |
| C | -1.439669 | -0.309610 | 1.231028  |
| H | -2.863705 | -1.836085 | 0.346041  |
| H | -0.757705 | 0.409777  | 1.633649  |
| C | 5.273515  | -2.431723 | -0.471360 |
| C | 4.234181  | -2.611504 | 0.098906  |
| H | 6.187873  | -2.253118 | -0.995428 |
| H | 3.308193  | -2.764094 | 0.613873  |
| C | 4.298894  | 1.681058  | 1.197479  |
| C | 4.698113  | 1.576607  | 0.072350  |
| H | 3.935638  | 1.751562  | 2.199486  |
| H | 5.042125  | 1.469695  | -0.932545 |

|   |           |           |           |
|---|-----------|-----------|-----------|
| C | 3.539281  | 0.757703  | -3.523274 |
| C | 3.533805  | -0.231417 | -2.846440 |
| H | 3.506129  | 1.642658  | -4.119975 |
| H | 3.516654  | -1.108768 | -2.235539 |
| C | -4.648837 | 1.258364  | 2.190440  |
| C | -5.615511 | 1.928461  | 2.417567  |
| H | -3.787301 | 0.658942  | 1.977834  |
| H | -6.478284 | 2.518326  | 2.628006  |
| C | -4.826251 | -0.868425 | -1.895323 |
| C | -5.240080 | -0.121075 | -1.055820 |
| H | -4.446194 | -1.539785 | -2.632428 |
| H | -5.589784 | 0.548885  | -0.300999 |
| C | 1.679047  | 5.553380  | -0.637631 |
| C | 2.497734  | 4.821226  | -0.159789 |
| H | 0.939822  | 6.187663  | -1.074018 |
| H | 3.230295  | 4.160200  | 0.250323  |
| C | 7.082406  | -0.824490 | -3.158671 |
| C | 8.162925  | -1.198220 | -2.802890 |
| H | 6.114817  | -0.491972 | -3.469528 |
| H | 9.130207  | -1.525458 | -2.496879 |
| C | -2.067901 | 3.762740  | 1.925535  |
| C | -1.035536 | 3.999657  | 1.364770  |
| H | -2.990292 | 3.535818  | 2.412926  |
| H | -0.115805 | 4.198254  | 0.855185  |
| C | -0.939723 | -8.456710 | -2.259695 |
| C | -1.428449 | -7.390000 | -2.021404 |
| H | -0.512201 | -9.409071 | -2.475070 |
| H | -1.873238 | -6.440231 | -1.813115 |
| C | -0.059444 | 1.863617  | -1.147323 |
| C | 1.042272  | 1.607653  | -0.750950 |
| H | -1.040613 | 2.109725  | -1.488326 |
| H | 2.024700  | 1.382328  | -0.393043 |
| C | 1.961344  | 4.094494  | -4.974574 |
| C | 1.762445  | 3.781107  | -3.835480 |
| H | 2.139866  | 4.374790  | -5.987511 |
| H | 1.578949  | 3.499951  | -2.819323 |
| C | -1.926127 | 5.115497  | -1.812785 |
| C | -1.330594 | 5.081515  | -2.851287 |
| H | -2.444561 | 5.133416  | -0.880213 |
| H | -0.787699 | 5.040559  | -3.769287 |
| C | 4.922956  | -0.997188 | 3.266335  |
| C | 4.645439  | -0.773783 | 4.409701  |
| H | 5.161009  | -1.188972 | 2.242152  |
| H | 4.400826  | -0.568305 | 5.426773  |
| C | -6.956535 | -3.603403 | -0.662469 |
| C | -7.280135 | -4.748986 | -0.534349 |
| H | -6.657586 | -2.584042 | -0.782272 |
| H | -7.578289 | -5.765582 | -0.416236 |
| C | 2.188924  | -6.512955 | -1.261620 |
| C | 3.208212  | -5.919611 | -1.052457 |
| H | 1.275452  | -7.036117 | -1.448914 |
| H | 4.108755  | -5.378229 | -0.864392 |
| C | 1.004681  | 1.775244  | 3.240473  |
| C | 1.485894  | 0.678498  | 3.196539  |
| H | 0.552162  | 2.741431  | 3.272057  |
| H | 1.908319  | -0.302840 | 3.154641  |

## EICO 18

0 1

|   |           |           |           |
|---|-----------|-----------|-----------|
| C | 0.195913  | -0.331904 | -1.173616 |
| C | -0.462030 | 0.565818  | -1.620287 |
| H | 0.774024  | -1.136553 | -0.768844 |

|   |           |           |           |
|---|-----------|-----------|-----------|
| H | -1.066835 | 1.355391  | -2.015876 |
| C | 2.641131  | 2.431214  | -0.824717 |
| C | 3.511612  | 3.149264  | -0.421754 |
| H | 1.856534  | 1.793067  | -1.176291 |
| H | 4.281418  | 3.793171  | -0.060310 |
| C | -3.612691 | -0.518979 | -0.138006 |
| C | -4.592714 | -1.060564 | -0.565308 |
| H | -2.739307 | -0.036184 | 0.248356  |
| H | -5.469717 | -1.539643 | -0.938695 |
| C | -0.276880 | 4.697581  | -0.698426 |
| C | -1.140607 | 4.054286  | -0.172266 |
| H | 0.494012  | 5.272445  | -1.164144 |
| H | -1.910775 | 3.480573  | 0.298147  |
| C | -1.050378 | -4.366581 | -1.987805 |
| C | -1.636541 | -3.404956 | -1.578947 |
| H | -0.520960 | -5.214883 | -2.358512 |
| H | -2.161689 | -2.547033 | -1.214533 |
| C | 5.317355  | -0.538822 | 2.229866  |
| C | 4.764841  | 0.202449  | 1.469162  |
| H | 5.811627  | -1.194625 | 2.909826  |
| H | 4.272575  | 0.868281  | 0.792911  |
| C | 1.351828  | -3.187486 | 0.759141  |
| C | 2.327839  | -2.538625 | 1.008422  |
| H | 0.470543  | -3.748967 | 0.539095  |
| H | 3.197994  | -1.960865 | 1.236246  |
| C | -3.534195 | 2.052191  | -2.640161 |
| C | -2.945075 | 3.059356  | -2.914412 |
| H | -4.048972 | 1.154523  | -2.377073 |
| H | -2.429025 | 3.963368  | -3.157746 |
| C | -0.735197 | 1.251222  | 1.971236  |
| C | -1.688434 | 1.097744  | 2.680584  |
| H | 0.106146  | 1.399669  | 1.331917  |
| H | -2.537490 | 0.956602  | 3.312977  |
| C | -5.354314 | 0.021521  | 3.998954  |
| C | -4.724326 | -0.770615 | 3.357825  |
| H | -5.922897 | 0.719090  | 4.571324  |
| H | -4.151280 | -1.474255 | 2.790834  |
| C | -7.389356 | 1.759556  | -2.918352 |
| C | -6.877709 | 1.951923  | -1.852322 |
| H | -7.842462 | 1.592269  | -3.868857 |
| H | -6.405585 | 2.134313  | -0.909152 |
| C | 2.220644  | 6.740778  | -3.167907 |
| C | 2.547020  | 5.612345  | -2.931554 |
| H | 1.926020  | 7.742876  | -3.397033 |
| H | 2.840718  | 4.611134  | -2.703176 |
| C | -5.738839 | 4.696808  | -4.445162 |
| C | -6.374067 | 5.568585  | -4.965981 |
| H | -5.175461 | 3.921092  | -3.970324 |
| H | -6.948178 | 6.340720  | -5.424681 |
| C | -4.990155 | -5.979406 | 0.638496  |
| C | -4.194216 | -5.594267 | -0.168880 |
| H | -5.701565 | -6.329451 | 1.351140  |
| H | -3.474181 | -5.244213 | -0.877489 |
| C | -2.365564 | -3.409494 | 2.016312  |
| C | -1.613241 | -2.519565 | 2.295263  |
| H | -3.033969 | -4.202034 | 1.756362  |
| H | -0.943183 | -1.722565 | 2.532792  |
| C | -2.289168 | 6.227967  | -4.441052 |
| C | -1.113378 | 6.009416  | -4.363549 |
| H | -3.343737 | 6.393669  | -4.494209 |
| H | -0.063878 | 5.822220  | -4.289132 |
| C | -4.839916 | 2.449410  | 1.251799  |
| C | -4.745558 | 3.487509  | 0.659698  |

|   |           |           |           |
|---|-----------|-----------|-----------|
| H | -4.930814 | 1.522144  | 1.775822  |
| H | -4.661133 | 4.410633  | 0.124305  |
| C | -3.701823 | 6.424018  | -1.292817 |
| C | -4.877533 | 6.509475  | -1.508552 |
| H | -2.654943 | 6.327867  | -1.103607 |
| H | -5.927093 | 6.571866  | -1.701255 |
| C | -8.802563 | 6.426072  | -1.408013 |
| C | -8.392592 | 5.392464  | -1.852426 |
| H | -9.176159 | 7.341117  | -1.009152 |
| H | -8.025081 | 4.469294  | -2.246612 |
| C | 1.142305  | 10.055230 | -4.789631 |
| C | 0.201890  | 9.314909  | -4.768325 |
| H | 1.974197  | 10.720776 | -4.816318 |
| H | -0.631168 | 8.646172  | -4.750207 |

## EICO 19

0 1

|   |           |           |           |
|---|-----------|-----------|-----------|
| C | 1.057626  | 2.428330  | 1.247224  |
| C | 0.470027  | 1.433163  | 1.567563  |
| H | 1.593460  | 3.310563  | 0.961634  |
| H | -0.059265 | 0.548554  | 1.854335  |
| C | -2.663462 | 2.944178  | 2.221715  |
| C | -3.801328 | 2.860429  | 1.855179  |
| H | -1.644238 | 3.013381  | 2.534043  |
| H | -4.813226 | 2.805503  | 1.517069  |
| C | 3.381319  | -0.409062 | 0.333317  |
| C | 4.163812  | -1.179901 | -0.145977 |
| H | 2.681884  | 0.281937  | 0.754474  |
| H | 4.850730  | -1.872581 | -0.579118 |
| C | -0.896179 | 6.875166  | 0.728128  |
| C | -0.503560 | 7.502808  | 1.669105  |
| H | -1.251713 | 6.313028  | -0.108464 |
| H | -0.160796 | 8.062734  | 2.509086  |
| C | 3.592454  | 4.979795  | 0.437686  |
| C | 2.659773  | 5.721403  | 0.561443  |
| H | 4.419228  | 4.312153  | 0.323692  |
| H | 1.819503  | 6.372515  | 0.670782  |
| C | -2.357273 | 4.756281  | -2.281166 |
| C | -2.372363 | 4.140935  | -1.253393 |
| H | -2.335135 | 5.294728  | -3.201345 |
| H | -2.395026 | 3.600457  | -0.330194 |
| C | 0.877813  | -3.345997 | 0.529927  |
| C | 1.010153  | -4.438358 | 1.006022  |
| H | 0.755059  | -2.375182 | 0.096295  |
| H | 1.159052  | -5.411856 | 1.421396  |
| C | -1.640175 | -1.699937 | 2.361773  |
| C | -2.312075 | -0.713969 | 2.253409  |
| H | -1.045919 | -2.581774 | 2.453787  |
| H | -2.905440 | 0.169131  | 2.153286  |
| C | 6.808897  | 2.958763  | -0.191000 |
| C | 5.968424  | 2.114450  | -0.319583 |
| H | 7.561375  | 3.705584  | -0.076083 |
| H | 5.220825  | 1.355835  | -0.427362 |
| C | 5.045715  | -5.070756 | -1.508110 |
| C | 4.008523  | -4.635535 | -1.096206 |
| H | 5.970171  | -5.454793 | -1.875036 |
| H | 3.086234  | -4.250585 | -0.713971 |
| C | -2.731955 | -4.260796 | -0.111372 |
| C | -3.925993 | -4.358780 | -0.105896 |
| H | -1.666340 | -4.182366 | -0.110110 |
| H | -4.991199 | -4.451009 | -0.102348 |



|   |           |           |           |
|---|-----------|-----------|-----------|
| C | 3.188932  | -7.284822 | 1.332561  |
| C | 2.514076  | -7.863706 | 2.134133  |
| H | 3.788426  | -6.765193 | 0.616832  |
| H | 1.921969  | -8.387076 | 2.849432  |
| C | -5.981670 | 3.787645  | -0.906399 |
| C | -6.794691 | 2.952271  | -0.630338 |
| H | -5.249410 | 4.523842  | -1.154940 |
| H | -7.515149 | 2.202174  | -0.386847 |
| C | -4.158492 | 0.415362  | -1.080884 |
| C | -3.888582 | -0.712813 | -0.777378 |
| H | -4.417241 | 1.415100  | -1.354721 |
| H | -3.639470 | -1.719706 | -0.510219 |
| C | -8.538107 | -0.431296 | 0.755697  |
| C | -7.399209 | -0.455815 | 0.385168  |
| H | -9.550636 | -0.413301 | 1.089581  |
| H | -6.382666 | -0.470133 | 0.049428  |
| C | 3.368955  | 2.837581  | -2.480506 |
| C | 2.416693  | 2.192679  | -2.145464 |
| H | 4.216236  | 3.419163  | -2.764591 |
| H | 1.566399  | 1.616141  | -1.848558 |
| C | -7.745428 | -4.139110 | -0.154868 |
| C | -7.583768 | -5.297697 | -0.409264 |
| H | -7.893969 | -3.105021 | 0.070251  |
| H | -7.445086 | -6.329788 | -0.637101 |
| C | 8.099166  | 0.174799  | 2.153073  |
| C | 8.740554  | -0.528761 | 2.878018  |
| H | 7.528774  | 0.805364  | 1.506782  |
| H | 9.309729  | -1.155326 | 3.524970  |
| C | 3.828762  | -0.899910 | -3.631028 |
| C | 3.858058  | -2.089112 | -3.771042 |
| H | 3.788550  | 0.159158  | -3.490343 |
| H | 3.892115  | -3.149309 | -3.882569 |
| C | 0.609202  | -0.843832 | -1.971158 |
| C | -0.388699 | -0.422100 | -1.457742 |
| H | 1.505132  | -1.208020 | -2.429090 |
| H | -1.291010 | -0.056122 | -1.016745 |

## EICO 20

0 1

|   |           |          |           |
|---|-----------|----------|-----------|
| C | 1.098640  | 2.511734 | 2.550715  |
| C | 2.179571  | 2.006783 | 2.435438  |
| H | 0.135108  | 2.964200 | 2.648552  |
| H | 3.147694  | 1.572162 | 2.324151  |
| C | 2.548318  | 5.244999 | -5.304312 |
| C | 2.894043  | 4.097294 | -5.345083 |
| H | 2.245072  | 6.270057 | -5.260332 |
| H | 3.180194  | 3.067938 | -5.369135 |
| C | 0.913457  | 5.462562 | 4.359546  |
| C | 0.421148  | 5.081170 | 5.383728  |
| H | 1.344825  | 5.791259 | 3.437404  |
| H | -0.024710 | 4.739695 | 6.292260  |
| C | 5.468184  | 3.135217 | 0.660509  |
| C | 5.415177  | 3.291812 | 1.847602  |
| H | 5.516236  | 3.002280 | -0.399008 |
| H | 5.349963  | 3.427778 | 2.906218  |
| C | -2.929805 | 2.702936 | 3.473051  |
| C | -2.074986 | 2.342996 | 4.232345  |
| H | -3.682670 | 3.013349 | 2.779931  |
| H | -1.309265 | 2.018411 | 4.905837  |
| C | 4.408497  | 1.978836 | -2.706553 |
| C | 5.514331  | 1.758594 | -3.111946 |
| H | 3.421654  | 2.190740 | -2.347515 |

|   |           |           |           |
|---|-----------|-----------|-----------|
| H | 6.499215  | 1.564685  | -3.471614 |
| C | -1.287206 | 5.461950  | 1.780305  |
| C | -0.791741 | 5.495876  | 0.689439  |
| H | -1.705731 | 5.421265  | 2.761574  |
| H | -0.335722 | 5.530121  | -0.277182 |
| C | 1.219886  | 3.533123  | -2.150821 |
| C | 1.307407  | 3.131915  | -1.024555 |
| H | 1.153965  | 3.900655  | -3.151682 |
| H | 1.375086  | 2.781439  | -0.015977 |
| C | 0.382057  | 7.268175  | -2.698129 |
| C | 1.369465  | 6.896960  | -2.129118 |
| H | -0.488406 | 7.595588  | -3.221329 |
| H | 2.241278  | 6.549310  | -1.616731 |
| C | 2.395597  | 6.967673  | 1.271070  |
| C | 2.948191  | 5.904999  | 1.240020  |
| H | 1.886198  | 7.904650  | 1.289662  |
| H | 3.447797  | 4.959775  | 1.203845  |
| C | -1.227559 | 3.336768  | -7.635046 |
| C | -0.110884 | 3.667494  | -7.355762 |
| H | -2.220362 | 3.042833  | -7.889179 |
| H | 0.880671  | 3.967252  | -7.089819 |
| C | 1.220833  | 0.913713  | -5.383875 |
| C | 2.152548  | 0.386787  | -4.847282 |
| H | 0.391703  | 1.384374  | -5.864925 |
| H | 2.982496  | -0.076544 | -4.363735 |
| C | -5.515176 | 3.770490  | 0.724352  |
| C | -4.439587 | 4.267660  | 0.552294  |
| H | -6.475723 | 3.330790  | 0.865938  |
| H | -3.474541 | 4.706926  | 0.414117  |
| C | 3.879525  | 3.422441  | 5.285843  |
| C | 4.842882  | 2.745471  | 5.506554  |
| H | 3.008657  | 4.017519  | 5.103137  |
| H | 5.699026  | 2.144784  | 5.713044  |
| C | -2.589852 | 4.075032  | 7.303515  |
| C | -2.185283 | 4.447868  | 8.367033  |
| H | -2.941699 | 3.745071  | 6.349637  |
| H | -1.833947 | 4.786345  | 9.314942  |
| C | 0.124641  | 1.611484  | 7.115988  |
| C | 0.934628  | 1.563732  | 6.234925  |
| H | -0.601307 | 1.666846  | 7.895426  |
| H | 1.653847  | 1.530196  | 5.446037  |
| C | 5.137533  | 6.070811  | -1.389323 |
| C | 4.793757  | 5.509893  | -2.390891 |
| H | 5.435477  | 6.555353  | -0.486821 |
| H | 4.477849  | 5.014711  | -3.284110 |
| C | 0.873825  | 10.690329 | -3.617625 |
| C | 0.067787  | 11.485555 | -4.007455 |
| H | 1.589414  | 9.969973  | -3.285467 |
| H | -0.648166 | 12.199717 | -4.344878 |
| C | -0.203645 | 8.241991  | -6.063412 |
| C | -0.508238 | 7.170323  | -6.503427 |
| H | 0.055484  | 9.194782  | -5.654930 |
| H | -0.780477 | 6.214893  | -6.895500 |
| C | 3.949992  | 8.426002  | -4.374475 |
| C | 3.494945  | 9.034470  | -5.299907 |
| H | 4.357176  | 7.873301  | -3.555308 |
| H | 3.091808  | 9.578506  | -6.123517 |

---

## Section 2: Optimized cationic structures

## DEC1

1 2

|   |           |           |           |
|---|-----------|-----------|-----------|
| C | 3.469658  | 2.231326  | 0.067951  |
| H | 3.175997  | 2.785834  | 0.931997  |
| C | 4.829678  | -2.073870 | -1.172262 |
| H | 4.391825  | -2.783644 | -1.838168 |
| C | 5.353504  | -1.302055 | -0.420684 |
| H | 5.844468  | -0.619982 | 0.237292  |
| C | 3.833014  | 1.649085  | -0.915764 |
| H | 4.188037  | 1.131607  | -1.780325 |
| C | 0.593868  | 3.492377  | -1.998175 |
| H | 1.654621  | 3.512307  | -2.115629 |
| C | -0.597736 | 3.499920  | -1.869441 |
| H | -1.660614 | 3.536394  | -1.751023 |
| C | -0.038805 | 0.314207  | -0.681928 |
| H | -0.029980 | 1.154084  | -1.364791 |
| C | -0.329115 | -0.719510 | -0.044971 |
| H | -0.822134 | -1.616951 | 0.305687  |
| C | 1.402850  | -3.766132 | -0.145456 |
| H | 0.570068  | -3.982080 | -0.777195 |
| C | 2.341677  | -3.574303 | 0.573744  |
| H | 3.197636  | -3.437074 | 1.196868  |
| C | -2.376430 | -3.289947 | 1.285614  |
| H | -3.291087 | -3.059775 | 0.784224  |
| C | 0.771762  | 0.181347  | 0.731414  |
| H | 0.420412  | 0.773106  | 1.569889  |
| C | 2.042707  | -0.209569 | 0.577305  |
| H | 2.642330  | -0.800422 | -0.108721 |
| C | -1.358329 | -3.567978 | 1.853350  |
| H | -0.460675 | -3.851549 | 2.356358  |
| C | -3.720386 | -0.557176 | -0.482009 |
| H | -3.696108 | -0.182428 | 0.519042  |
| C | -3.750345 | -0.980342 | -1.602522 |
| H | -3.802733 | -1.359515 | -2.598894 |
| C | -4.102862 | 3.024456  | -0.634695 |
| H | -4.395527 | 2.113722  | -1.109675 |
| C | -3.797787 | 4.054587  | -0.104906 |
| H | -3.552699 | 4.984660  | 0.357943  |
| C | -2.327582 | 1.316276  | 2.237148  |
| H | -2.549066 | 2.203008  | 1.681305  |
| C | -2.119075 | 0.315696  | 2.863019  |
| H | -1.957179 | -0.570480 | 3.436418  |

## DEC 2

1 2

|   |           |           |           |
|---|-----------|-----------|-----------|
| C | -0.029403 | -1.263902 | 2.689157  |
| C | -1.030638 | -1.920709 | 2.634019  |
| H | 0.871082  | -0.689656 | 2.761344  |
| H | -1.927463 | -2.500195 | 2.599375  |
| C | -0.753949 | 1.784953  | -3.017195 |
| C | -0.558594 | 3.064041  | -2.724907 |
| H | -1.039119 | 1.466657  | -4.017569 |
| H | -0.276911 | 3.651450  | -1.856819 |
| C | -4.354501 | -2.014591 | 0.894508  |
| C | -4.071221 | -3.124851 | 0.544895  |
| H | -4.624967 | -1.030949 | 1.209170  |
| H | -3.849575 | -4.123680 | 0.240499  |
| C | -3.177351 | 1.657369  | 0.264163  |
| C | -2.469780 | 1.055000  | 1.021544  |
| H | -3.826773 | 2.199690  | -0.387118 |
| H | -1.853373 | 0.505242  | 1.703567  |
| C | 2.772462  | 0.714454  | -2.253685 |
| C | 2.723114  | 0.591720  | -1.062265 |

|   |           |           |           |
|---|-----------|-----------|-----------|
| H | 2.847720  | 0.825818  | -3.312565 |
| H | 2.710373  | 0.489175  | 0.003933  |
| C | -0.020989 | -1.522703 | -1.193759 |
| C | -1.241923 | -1.403644 | -0.922702 |
| H | 0.997472  | -1.872459 | -1.122950 |
| H | -2.197066 | -1.576730 | -0.449231 |
| C | 2.858532  | 1.123301  | 2.664397  |
| C | 3.424284  | 0.076977  | 2.520687  |
| H | 2.370085  | 2.061894  | 2.805996  |
| H | 3.934189  | -0.853614 | 2.401376  |
| C | 1.274748  | 3.405827  | 0.331876  |
| C | 0.199205  | 3.443090  | 0.859600  |
| H | 2.238815  | 3.381195  | -0.127358 |
| H | -0.754992 | 3.489820  | 1.336911  |
| C | 2.473924  | -3.025845 | 0.731556  |
| C | 3.308409  | -2.743766 | -0.080637 |
| H | 1.737249  | -3.283742 | 1.460955  |
| H | 4.064608  | -2.505607 | -0.795477 |
| C | -0.788439 | -0.557747 | -2.177131 |
| C | -0.594810 | 0.806376  | -1.984652 |
| H | -1.053183 | -0.920056 | -3.166109 |
| H | -0.313895 | 1.157725  | -0.994212 |

# DEC 3

1 2

|   |           |           |           |
|---|-----------|-----------|-----------|
| C | 4.237570  | 1.174320  | -0.420402 |
| C | 4.425134  | 1.094083  | -1.601125 |
| H | 4.082911  | 1.245467  | 0.634444  |
| H | 4.627463  | 1.026306  | -2.647094 |
| C | 0.989522  | 4.677113  | -0.425756 |
| C | 1.950796  | 4.043793  | -0.757531 |
| H | 0.155325  | 5.278431  | -0.139708 |
| H | 2.823868  | 3.500297  | -1.048628 |
| C | -0.334463 | -2.380621 | 3.164954  |
| C | 0.556023  | -3.147814 | 3.396548  |
| H | -1.134464 | -1.697261 | 2.979972  |
| H | 1.335169  | -3.840930 | 3.625299  |
| C | 1.517297  | -1.298726 | -0.398574 |
| C | 1.342650  | -2.500671 | 0.143067  |
| H | 2.506675  | -0.892934 | -0.600208 |
| H | 0.520834  | -3.141654 | 0.441062  |
| C | -0.818931 | 1.090438  | -2.253997 |
| C | -0.792397 | 1.687842  | -1.147526 |
| H | -1.149709 | 0.822186  | -3.241242 |
| H | -1.082433 | 2.374947  | -0.374226 |
| C | -3.983451 | -0.913623 | -2.075106 |
| C | -4.367535 | 0.208095  | -2.244033 |
| H | -3.666100 | -1.921198 | -1.919164 |
| H | -4.735245 | 1.197075  | -2.404089 |
| C | -1.751509 | -3.800910 | -1.040380 |
| C | -2.192300 | -3.505798 | 0.034031  |
| H | -1.375108 | -4.093883 | -1.995710 |
| H | -2.599635 | -3.277986 | 0.994575  |
| C | 0.419188  | 0.722478  | -1.349048 |
| C | 0.365906  | -0.527420 | -0.724293 |
| H | 1.390856  | 1.151609  | -1.575783 |
| H | -0.614069 | -0.942139 | -0.491709 |
| C | -1.893802 | 0.643371  | 1.955474  |
| C | -2.739397 | 0.247806  | 1.203049  |
| H | -1.143921 | 1.004195  | 2.625962  |
| H | -3.501622 | -0.074888 | 0.525502  |
| C | 1.684667  | 0.654188  | 2.551415  |
| C | 1.634290  | 1.729566  | 2.024314  |

|   |          |           |          |
|---|----------|-----------|----------|
| H | 1.720495 | -0.297722 | 3.035930 |
| H | 1.602891 | 2.693459  | 1.561442 |

# DEC 4

1 2

|   |           |           |           |
|---|-----------|-----------|-----------|
| C | 2.442078  | 1.278628  | 1.444467  |
| C | 1.383937  | 1.703004  | 1.073519  |
| H | 3.392914  | 0.920783  | 1.774666  |
| H | 0.444918  | 2.107686  | 0.755522  |
| C | 0.911168  | -1.654101 | 0.374732  |
| C | -0.181906 | -1.445833 | 1.229242  |
| H | 1.908770  | -1.595454 | 0.807691  |
| H | 0.022383  | -1.238627 | 2.274178  |
| C | -1.248737 | 1.005907  | 3.640656  |
| C | -2.356047 | 0.662077  | 3.339171  |
| H | -0.270825 | 1.324659  | 3.926783  |
| H | -3.349880 | 0.366130  | 3.082554  |
| C | -2.059937 | 0.058013  | -2.703526 |
| C | -0.924481 | 0.345035  | -2.958033 |
| H | -3.077647 | -0.185200 | -2.485802 |
| H | 0.084611  | 0.602030  | -3.200906 |
| C | 4.903093  | -1.762785 | 0.753125  |
| C | 4.897394  | -0.883666 | -0.061201 |
| H | 4.952179  | -2.544920 | 1.478196  |
| H | 4.916408  | -0.104730 | -0.792481 |
| C | -5.039244 | -0.614357 | 0.064886  |
| H | -5.411831 | -1.613517 | 0.100892  |
| C | -1.870151 | 2.905542  | -0.484813 |
| H | -1.755086 | 2.780765  | -1.539263 |
| C | -2.015735 | 3.057027  | 0.695426  |
| H | -2.149573 | 3.201576  | 1.745116  |
| C | -4.661165 | 0.521370  | 0.022101  |
| H | -4.338271 | 1.538904  | -0.018027 |
| C | -1.485471 | -0.818613 | 0.610612  |
| H | -1.775843 | 0.180753  | 0.330372  |
| C | -1.568281 | -2.052172 | 0.846218  |
| H | -2.028481 | -3.019616 | 0.943856  |
| C | 0.839891  | -1.937105 | -1.016706 |
| H | -0.119471 | -1.975681 | -1.525364 |
| C | 1.983046  | -2.128149 | -1.670866 |
| H | 3.043441  | -2.139553 | -1.442016 |
| C | 2.757878  | 1.024378  | -2.339219 |
| H | 2.542998  | 1.479142  | -1.395555 |
| C | 3.012778  | 0.523636  | -3.397897 |
| H | 3.248835  | 0.101140  | -4.349719 |

# DEC 5

1 2

|   |           |           |           |
|---|-----------|-----------|-----------|
| C | -4.021940 | -0.970195 | 1.152496  |
| C | -4.293097 | -1.816470 | 0.349642  |
| H | -3.811754 | -0.219116 | 1.881347  |
| H | -4.556352 | -2.576438 | -0.351603 |
| C | -0.816358 | -2.530899 | -1.401734 |
| C | -1.532637 | -1.497862 | -1.549794 |
| H | -0.421170 | -3.505385 | -1.631161 |
| H | -2.246604 | -0.837342 | -2.010008 |
| C | -5.654678 | 2.816844  | 0.059827  |
| C | -6.046440 | 1.686754  | 0.112964  |
| H | -5.325557 | 3.830440  | 0.008864  |
| H | -6.411790 | 0.685829  | 0.163108  |
| C | -1.394115 | 2.244106  | -1.542073 |

|   |           |           |           |
|---|-----------|-----------|-----------|
| C | -2.388606 | 1.901063  | -0.967868 |
| H | -0.528627 | 2.579903  | -2.067378 |
| H | -3.303277 | 1.631058  | -0.480098 |
| C | 0.462006  | -0.688658 | -0.173384 |
| C | -0.697549 | -1.507979 | -0.247793 |
| H | 0.767539  | -0.359633 | 0.818562  |
| H | -1.209898 | -1.719769 | 0.685493  |
| C | 2.341892  | 0.524641  | -0.957119 |
| C | 1.241180  | -0.241614 | -1.241656 |
| H | 2.555426  | 0.765662  | 0.082413  |
| H | 0.992280  | -0.506203 | -2.264308 |
| C | 2.881615  | -3.323196 | -0.165567 |
| C | 2.309034  | -3.480834 | 0.874447  |
| H | 3.407467  | -3.210974 | -1.087435 |
| H | 1.815179  | -3.649733 | 1.805591  |
| C | 3.259995  | 1.027057  | -1.948053 |
| C | 4.342457  | 1.688676  | -1.573607 |
| H | 3.058994  | 0.835784  | -3.000526 |
| H | 4.812249  | 2.005633  | -0.650767 |
| C | 4.364336  | -0.326689 | 1.852983  |
| C | 4.553086  | 0.796124  | 2.225612  |
| H | 4.208310  | -1.335158 | 1.535362  |
| H | 4.740191  | 1.785294  | 2.580773  |
| C | 0.249215  | 2.085519  | 1.875826  |
| C | 1.031082  | 1.655576  | 2.675478  |
| H | -0.455572 | 2.471862  | 1.171350  |
| H | 1.722483  | 1.286321  | 3.399795  |

DEC 6

1 2

|   |           |           |           |
|---|-----------|-----------|-----------|
| C | 2.709866  | -2.454792 | -0.875470 |
| C | 2.718327  | -2.710983 | -2.046013 |
| H | 2.710630  | -2.235010 | 0.170211  |
| H | 2.751372  | -2.954638 | -3.084974 |
| C | 3.073844  | 2.122032  | -2.249799 |
| C | 3.771909  | 1.219118  | -1.884866 |
| H | 2.465036  | 2.932402  | -2.587003 |
| H | 4.410259  | 0.418800  | -1.580758 |
| C | 1.320538  | -0.602913 | 2.169826  |
| C | 0.729021  | -1.640956 | 2.068490  |
| H | 1.844148  | 0.322827  | 2.281456  |
| H | 0.221990  | -2.578786 | 1.983303  |
| C | 0.385704  | 0.010593  | -1.606245 |
| C | -0.575614 | -0.935790 | -1.161428 |
| H | 1.387555  | -0.002085 | -2.005112 |
| H | -0.473712 | -1.996798 | -0.933189 |
| C | -2.430916 | 2.068613  | 2.087094  |
| C | -1.765246 | 1.226108  | 2.619086  |
| H | -3.034354 | 2.824817  | 1.634831  |
| H | -1.171068 | 0.480252  | 3.100965  |
| C | -1.442947 | -4.081307 | 0.337990  |
| C | -0.377512 | -4.442695 | -0.075854 |
| H | -2.398453 | -3.776021 | 0.708114  |
| H | 0.566066  | -4.785128 | -0.441084 |
| C | 1.302281  | 3.065077  | 2.015294  |
| C | 2.169851  | 2.886477  | 1.207345  |
| H | 0.539162  | 3.235598  | 2.743022  |
| H | 2.948853  | 2.740765  | 0.489436  |
| C | -1.524433 | 0.008878  | -0.686113 |
| C | -0.317395 | 0.764467  | -0.624420 |
| H | -2.461363 | -0.028717 | -0.151723 |

|   |           |           |           |
|---|-----------|-----------|-----------|
| H | 0.067623  | 1.394338  | 0.174904  |
| C | -4.499957 | -1.902529 | 0.252055  |
| C | -4.191304 | -1.421279 | 1.304832  |
| H | -4.807807 | -2.337028 | -0.673228 |
| H | -3.947002 | -0.984613 | 2.248041  |
| C | -0.950130 | 3.311808  | -2.198001 |
| C | -0.368287 | 3.751271  | -1.246553 |
| H | -1.476503 | 2.960153  | -3.057662 |
| H | 0.152331  | 4.156521  | -0.405776 |

DEC 7

1 2

|   |           |           |           |
|---|-----------|-----------|-----------|
| C | 1.596727  | -2.398815 | 1.827301  |
| C | 0.958491  | -2.210825 | 2.823652  |
| H | 2.158984  | -2.577258 | 0.933738  |
| H | 0.389989  | -2.052381 | 3.711541  |
| C | 3.133619  | -4.183433 | -1.167796 |
| C | 2.532351  | -3.274616 | -1.667221 |
| H | 3.671421  | -4.996742 | -0.737718 |
| H | 1.981818  | -2.449854 | -2.089733 |
| C | 3.362632  | 1.201332  | 0.631154  |
| C | 3.450413  | 0.656141  | 1.694002  |
| H | 3.265414  | 1.677976  | -0.320894 |
| H | 3.528374  | 0.152197  | 2.630330  |
| C | 1.755858  | 3.137308  | -2.187506 |
| C | 1.744067  | 2.032671  | -2.652790 |
| H | 1.757537  | 4.119737  | -1.772208 |
| H | 1.701431  | 1.028949  | -3.027415 |
| C | -1.953562 | 0.354666  | 1.046050  |
| C | -0.698435 | 0.075182  | 0.350736  |
| H | -1.845960 | 0.813414  | 2.026954  |
| H | 0.216468  | 0.295301  | 0.898876  |
| C | -0.555721 | -0.434158 | -0.913012 |
| C | 0.723566  | -0.623359 | -1.486590 |
| H | -1.450386 | -0.666679 | -1.489541 |
| H | 1.462649  | -0.346559 | -0.709100 |
| C | -2.969917 | -4.357271 | 1.106719  |
| C | -1.893723 | -3.833065 | 1.079904  |
| H | -3.921671 | -4.836861 | 1.125888  |
| H | -0.930265 | -3.370191 | 1.065098  |
| C | -3.215332 | 0.632356  | 0.244801  |
| C | -3.166080 | -0.527922 | 0.775219  |
| H | -3.656537 | 1.397508  | -0.370192 |
| H | -3.523044 | -1.525262 | 0.966388  |
| C | -1.946142 | 2.986632  | -2.163393 |
| C | -2.992626 | 3.563373  | -2.248456 |
| H | -1.004235 | 2.483825  | -2.094211 |
| H | -3.920538 | 4.079451  | -2.342937 |
| C | 0.569189  | 3.282263  | 1.364751  |
| C | -0.447297 | 3.716888  | 0.904342  |
| H | 1.478554  | 2.883127  | 1.757438  |
| H | -1.348084 | 4.094960  | 0.475836  |

DEC 8

1 2

|   |           |          |           |
|---|-----------|----------|-----------|
| C | 0.941329  | 4.203983 | -0.628538 |
| C | 0.312058  | 4.666165 | 0.280632  |
| H | 1.511845  | 3.804353 | -1.439484 |
| H | -0.234174 | 5.108841 | 1.084070  |
| C | 3.352246  | 0.934818 | 1.954082  |
| C | 2.686483  | 1.896924 | 1.695705  |
| H | 3.964978  | 0.098370 | 2.207760  |

|   |           |           |           |
|---|-----------|-----------|-----------|
| H | 2.118112  | 2.772351  | 1.462716  |
| C | 2.523937  | 1.268913  | -2.946662 |
| C | 3.075078  | 1.358026  | -1.886629 |
| H | 2.059407  | 1.199539  | -3.904881 |
| H | 3.569041  | 1.444803  | -0.942939 |
| C | 2.165928  | -2.034954 | -0.858051 |
| C | 1.822210  | -2.297660 | 0.331208  |
| H | 2.832084  | -1.783504 | -1.665145 |
| H | 1.945331  | -2.459189 | 1.389266  |
| C | -2.225651 | 1.003221  | -1.074830 |
| C | -2.928440 | 2.114978  | -1.217611 |
| H | -2.648851 | 0.045406  | -1.367482 |
| H | -2.802498 | 3.176035  | -1.037855 |
| C | 0.654163  | -2.333507 | -0.681703 |
| C | -0.262992 | -1.242675 | -0.739214 |
| H | 0.276127  | -3.298363 | -1.005799 |
| H | -1.253783 | -1.477790 | -1.123187 |
| C | -3.229325 | -2.530719 | -2.720247 |
| C | -3.379404 | -2.888231 | -1.586738 |
| H | -3.121371 | -2.239774 | -3.741436 |
| H | -3.526168 | -3.213322 | -0.580412 |
| C | 0.564638  | -2.301404 | 3.820360  |
| C | 0.865265  | -1.171185 | 3.559965  |
| H | 0.298085  | -3.301750 | 4.081870  |
| H | 1.147299  | -0.162197 | 3.349654  |
| C | -3.584259 | -1.006269 | 1.383044  |
| C | -2.546490 | -1.251684 | 1.928770  |
| H | -4.521817 | -0.790262 | 0.921163  |
| H | -1.635954 | -1.459847 | 2.449303  |
| C | 0.018309  | 0.069264  | -0.370426 |
| C | -0.891565 | 1.089237  | -0.535572 |
| H | 0.995066  | 0.314479  | 0.031384  |
| H | -0.565655 | 2.086987  | -0.248303 |

DEC 9

1 2

|   |           |           |           |
|---|-----------|-----------|-----------|
| C | 0.896725  | 2.407726  | -1.835629 |
| C | -0.049817 | 2.755310  | -1.186795 |
| H | 1.754530  | 2.131146  | -2.409847 |
| H | -0.886648 | 3.084069  | -0.605880 |
| C | 3.165550  | 2.035517  | 2.398091  |
| C | 2.453090  | 2.396049  | 1.504744  |
| H | 3.803412  | 1.739914  | 3.201279  |
| H | 1.828532  | 2.725109  | 0.701210  |
| C | 4.554313  | 1.061123  | -2.251012 |
| C | 4.517548  | 1.912954  | -1.409495 |
| H | 4.622249  | 0.317285  | -3.013273 |
| H | 4.505350  | 2.677471  | -0.664196 |
| C | 2.603139  | -0.804372 | 0.107811  |
| C | 2.067448  | -1.914639 | 0.364604  |
| H | 3.354401  | -0.032463 | 0.069775  |
| H | 1.933915  | -2.914379 | 0.752764  |
| C | -3.416271 | 0.025570  | -1.147530 |
| C | -2.933431 | 0.791530  | -1.932443 |
| H | -3.860164 | -0.666663 | -0.466731 |
| H | -2.520131 | 1.474140  | -2.642068 |
| C | 1.205317  | -0.984848 | -0.569348 |
| C | 0.072005  | -0.382423 | -0.009574 |
| H | 1.174024  | -1.214024 | -1.629229 |
| H | -0.782310 | -0.196201 | -0.657527 |
| C | -1.872497 | -3.070891 | -0.787707 |
| C | -1.690227 | -3.251704 | 0.382395  |
| H | -2.059212 | -2.922369 | -1.828303 |



|   |           |           |          |
|---|-----------|-----------|----------|
| H | -1.534914 | -3.448347 | 1.420044 |
| C | 0.980686  | -5.233765 | 1.296225 |
| C | 1.487881  | -4.928416 | 2.337393 |
| H | 0.523060  | -5.528429 | 0.377850 |
| H | 1.942254  | -4.693567 | 3.274064 |
| C | -2.943996 | 3.161398  | 1.040511 |
| C | -2.176558 | 3.796672  | 1.706275 |
| H | -3.635181 | 2.609163  | 0.442087 |
| H | -1.513182 | 4.384696  | 2.301033 |
| C | -0.081410 | 0.001089  | 1.355855 |
| C | -1.248655 | 0.490455  | 1.755463 |
| H | 0.751256  | -0.101722 | 2.052256 |
| H | -1.707857 | 0.865287  | 2.661290 |

DEC 10

1 2

|   |           |           |           |
|---|-----------|-----------|-----------|
| C | -2.294845 | -0.845082 | -3.108130 |
| C | -1.596234 | 0.039160  | -2.697814 |
| H | -2.916931 | -1.617159 | -3.508483 |
| H | -0.962781 | 0.825732  | -2.343435 |
| C | -1.023494 | 3.403290  | -0.738657 |
| C | -1.150207 | 2.423077  | -0.060398 |
| H | -0.866554 | 4.286604  | -1.316080 |
| H | -1.227876 | 1.543708  | 0.544440  |
| C | -1.841028 | -0.645870 | 2.081244  |
| C | -1.973015 | -1.054089 | 0.963126  |
| H | -1.691710 | -0.304649 | 3.079122  |
| H | -2.080356 | -1.435222 | -0.027817 |
| C | -5.991168 | 0.500920  | -0.134181 |
| C | -5.010517 | 0.460833  | 0.649601  |
| H | -6.992289 | 0.415093  | -0.522426 |
| H | -4.428607 | 0.265997  | 1.534683  |
| C | -4.107478 | -3.528361 | -0.919369 |
| C | -4.794191 | -3.150268 | -0.013893 |
| H | -3.493640 | -3.902265 | -1.707782 |
| H | -5.401762 | -2.854834 | 0.811738  |
| C | -8.349361 | 2.709416  | -1.816172 |
| C | -8.207647 | 1.737323  | -2.501720 |
| H | -8.517249 | 3.568002  | -1.205131 |
| H | -8.094647 | 0.866669  | -3.112060 |
| C | -5.228680 | 3.000313  | -4.308213 |
| C | -4.119332 | 2.792549  | -4.712882 |
| H | -6.220474 | 3.196737  | -3.954237 |
| H | -3.139558 | 2.599538  | -5.093251 |
| C | -4.387792 | 2.223747  | -1.106354 |
| C | -4.611790 | 0.877286  | -0.813683 |
| H | -3.742912 | 2.451815  | -1.951136 |
| H | -4.139437 | 0.137526  | -1.447667 |
| C | -4.720550 | 4.562512  | -0.886963 |
| C | -4.968213 | 3.343872  | -0.429305 |
| H | -4.154676 | 5.038410  | -1.679091 |
| H | -5.628027 | 3.182180  | 0.418594  |
| C | -6.167013 | -1.566130 | -3.179803 |
| C | -5.816908 | -0.573157 | -3.752692 |
| H | -6.452083 | -2.461815 | -2.668031 |
| H | -5.491162 | 0.303261  | -4.271104 |

DEC 11

1 2

|   |          |          |           |
|---|----------|----------|-----------|
| C | 0.473840 | 2.136983 | 0.585875  |
| C | 0.438268 | 1.586381 | -0.477741 |

|   |           |           |           |
|---|-----------|-----------|-----------|
| H | 0.547151  | 2.633004  | 1.527931  |
| H | 0.448078  | 1.103071  | -1.432765 |
| C | 0.762590  | -0.455629 | -3.691116 |
| C | 0.918859  | 0.669951  | -4.069589 |
| H | 0.632878  | -1.466121 | -3.373688 |
| H | 1.076360  | 1.665378  | -4.421062 |
| C | -1.843777 | -2.025487 | 1.854400  |
| C | -1.249059 | -1.057392 | 1.472968  |
| H | -2.340399 | -2.900186 | 2.211564  |
| H | -0.693388 | -0.205518 | 1.137393  |
| C | -3.240736 | 2.286064  | 0.281621  |
| C | -3.243136 | 2.877492  | 1.546870  |
| H | -2.545920 | 2.173363  | -0.539344 |
| H | -2.495347 | 3.419495  | 2.110447  |
| C | -4.409064 | 0.334094  | 0.603067  |
| C | -4.786506 | -0.677695 | -0.297540 |
| H | -3.780370 | 0.045570  | 1.444641  |
| H | -4.376432 | -1.668885 | -0.133739 |
| C | -3.382023 | 2.313618  | -3.410526 |
| C | -2.549447 | 1.451585  | -3.431731 |
| H | -4.105867 | 3.097840  | -3.421867 |
| H | -1.794416 | 0.694453  | -3.475071 |
| C | -4.548026 | 2.500205  | 1.810745  |
| C | -4.682774 | 1.754862  | 0.485998  |
| H | -5.231155 | 2.589530  | 2.644563  |
| H | -5.448878 | 2.047344  | -0.229306 |
| C | -6.167598 | -0.562811 | -1.017668 |
| C | -5.184558 | -0.279126 | -1.754441 |
| H | -7.187384 | -0.757275 | -0.735127 |
| H | -4.634563 | 0.008424  | -2.635349 |
| C | -7.807156 | 0.878749  | 1.825850  |
| C | -7.271169 | 0.022520  | 2.469161  |
| H | -8.315806 | 1.642340  | 1.280006  |
| H | -6.827014 | -0.743037 | 3.065918  |
| C | -2.075506 | -2.106995 | -1.980713 |
| C | -2.478271 | -2.229897 | -3.102441 |
| H | -1.709348 | -2.021947 | -0.979537 |
| H | -2.820092 | -2.359006 | -4.105613 |

DEC 12

1 2

|   |           |           |           |
|---|-----------|-----------|-----------|
| C | 1.251651  | 2.944845  | -0.148735 |
| C | 2.042526  | 2.249546  | 0.542080  |
| H | 0.641763  | 3.792724  | -0.432778 |
| H | 2.693337  | 1.945830  | 1.343633  |
| C | -1.783243 | 0.497313  | 1.983774  |
| C | -1.160213 | 1.379512  | 2.503535  |
| H | -2.348151 | -0.289980 | 1.528247  |
| H | -0.635296 | 2.167279  | 2.996440  |
| C | -2.973227 | -2.461138 | -0.047609 |
| C | -3.303786 | -1.482534 | -0.656613 |
| H | -2.693440 | -3.351480 | 0.477921  |
| H | -3.616370 | -0.618827 | -1.201483 |
| C | -2.148019 | 2.095449  | -1.143585 |
| C | -1.916829 | 1.906159  | -2.304268 |
| H | -2.364954 | 2.266279  | -0.110936 |
| H | -1.735776 | 1.748255  | -3.344619 |
| C | -1.922580 | -5.961247 | 0.270672  |
| C | -1.626221 | -5.712131 | 1.403663  |
| H | -2.197516 | -6.208164 | -0.730133 |
| H | -1.364369 | -5.510517 | 2.418046  |
| C | 3.691786  | -0.938548 | 0.840124  |

|   |           |           |           |
|---|-----------|-----------|-----------|
| C | 4.604243  | -0.296827 | 0.403665  |
| H | 2.894527  | -1.531995 | 1.234796  |
| H | 5.439797  | 0.249329  | 0.025958  |
| C | -0.984947 | 5.541622  | -1.233896 |
| C | -0.191815 | 6.201097  | -0.625209 |
| H | -1.703446 | 4.971710  | -1.779939 |
| H | 0.498113  | 6.817526  | -0.093160 |
| C | 0.365662  | -2.252981 | 1.973643  |
| C | 0.667991  | -3.165747 | 1.258385  |
| H | 0.087849  | -1.452182 | 2.623590  |
| H | 0.925886  | -4.002399 | 0.646682  |
| C | 1.735020  | 1.645390  | -0.877580 |
| C | 0.891650  | 0.533659  | -0.882331 |
| H | 2.493117  | 1.731566  | -1.650185 |
| H | 0.131732  | 0.466815  | -0.104852 |
| C | 0.108128  | -1.524517 | -1.750611 |
| C | 0.988659  | -0.532272 | -1.822914 |
| H | -0.759889 | -1.804796 | -1.159033 |
| H | 1.771794  | -0.514179 | -2.577354 |

DEC 13

1 2

|   |           |           |           |
|---|-----------|-----------|-----------|
| C | -3.197980 | -0.884255 | -1.535791 |
| C | -2.987868 | -2.054673 | -1.687303 |
| H | -3.410494 | 0.155887  | -1.407784 |
| H | -2.837054 | -3.099887 | -1.844161 |
| C | 1.190523  | -0.351668 | -1.289944 |
| C | 0.041591  | 0.442504  | -1.031462 |
| H | 2.246134  | -0.130634 | -1.137335 |
| H | -0.160658 | 1.479251  | -0.809330 |
| C | 4.385232  | 0.843176  | 0.034369  |
| C | 3.608305  | 1.755627  | 0.064899  |
| H | 5.092772  | 0.043670  | 0.000338  |
| H | 2.934920  | 2.585804  | 0.079206  |
| C | 0.866831  | 3.947957  | -1.741705 |
| C | 0.689395  | 4.194462  | -0.582712 |
| H | 1.033267  | 3.769321  | -2.780832 |
| H | 0.545476  | 4.434994  | 0.447776  |
| C | 4.043449  | -2.502070 | -1.857199 |
| C | 3.765439  | -2.747203 | -0.717945 |
| H | 4.317412  | -2.308334 | -2.870657 |
| H | 3.531308  | -2.975918 | 0.298781  |
| C | -0.405033 | -0.827714 | -0.565565 |
| C | 0.507825  | -1.594235 | -1.350445 |
| H | -0.933217 | -1.079296 | 0.353584  |
| H | 0.792808  | -2.629814 | -1.439844 |
| C | -2.754919 | 2.823086  | -0.320904 |
| C | -3.125650 | 2.042284  | 0.509470  |
| H | -2.440538 | 3.539133  | -1.048544 |
| H | -3.462383 | 1.355890  | 1.256348  |
| C | -2.768458 | -1.355426 | 2.148417  |
| C | -1.882425 | -0.760182 | 2.694153  |
| H | -3.569549 | -1.884255 | 1.680529  |
| H | -1.096522 | -0.231794 | 3.190199  |
| C | 1.088798  | 2.095147  | 2.782851  |
| C | 0.034708  | 2.268461  | 2.240332  |
| H | 2.020631  | 1.957494  | 3.285378  |
| H | -0.912276 | 2.442386  | 1.775165  |
| C | 1.287344  | -2.171341 | 2.274363  |
| C | 1.963078  | -1.230197 | 1.968175  |
| H | 0.691605  | -3.004343 | 2.576928  |
| H | 2.577578  | -0.394753 | 1.706783  |

DEC 14

1 2

|   |           |           |           |
|---|-----------|-----------|-----------|
| C | -0.627404 | 2.372758  | 1.366459  |
| C | 0.007846  | 1.696747  | 2.125059  |
| H | -1.206881 | 2.970127  | 0.696530  |
| H | 0.555394  | 1.087941  | 2.810323  |
| C | 0.790950  | 0.268654  | -1.318789 |
| C | 1.048819  | -0.100282 | -2.429390 |
| H | 0.532107  | 0.591279  | -0.331790 |
| H | 1.256405  | -0.446394 | -3.417915 |
| C | 2.348397  | 3.854098  | 0.344049  |
| C | 2.872146  | 4.677889  | -0.450824 |
| H | 1.801473  | 3.472625  | 1.191349  |
| H | 3.212251  | 5.613918  | -0.857980 |
| C | 4.396302  | 1.505754  | -1.924701 |
| C | 5.602307  | 0.961330  | -1.866173 |
| H | 3.663286  | 1.210482  | -2.670407 |
| H | 6.501982  | 1.054758  | -1.269880 |
| C | 6.006341  | 4.256945  | 1.849541  |
| C | 6.712416  | 3.291330  | 1.790671  |
| H | 5.399765  | 5.131528  | 1.926840  |
| H | 7.359502  | 2.442413  | 1.772614  |
| C | 2.318422  | 3.397991  | -4.588038 |
| C | 3.309641  | 2.928015  | -5.069684 |
| H | 1.420723  | 3.815711  | -4.185219 |
| H | 4.180872  | 2.517308  | -5.529950 |
| C | 6.235250  | 5.056126  | -1.773262 |
| C | 5.490778  | 4.895418  | -2.698458 |
| H | 6.916945  | 5.207822  | -0.965521 |
| H | 4.835499  | 4.756839  | -3.531858 |
| C | -0.557218 | 4.569657  | -2.032621 |
| C | -0.610248 | 3.395445  | -2.265701 |
| H | -0.543703 | 5.618860  | -1.837716 |
| H | -0.667010 | 2.349385  | -2.477018 |
| C | 2.833866  | 3.205001  | -0.996504 |
| C | 4.055144  | 2.530103  | -0.985985 |
| H | 2.087354  | 2.940796  | -1.737320 |
| H | 4.792405  | 2.810571  | -0.236626 |
| C | 3.374830  | 0.286795  | 1.289993  |
| C | 3.847057  | 1.080555  | 2.053605  |
| H | 2.958524  | -0.435901 | 0.622514  |
| H | 4.282026  | 1.770845  | 2.742724  |

DEC 15

1 2

|   |           |           |           |
|---|-----------|-----------|-----------|
| C | -1.261837 | 3.463647  | 2.025276  |
| C | -1.681155 | 3.593826  | 0.910604  |
| H | -0.900807 | 3.371047  | 3.025583  |
| H | -2.082109 | 3.728200  | -0.069584 |
| C | -3.959151 | 0.866032  | -0.916481 |
| C | -4.333775 | 1.408098  | 0.084683  |
| H | -3.646659 | 0.384599  | -1.818010 |
| H | -4.686546 | 1.901810  | 0.963504  |
| C | 2.270071  | 3.274080  | 0.708822  |
| C | 3.441553  | 3.066033  | 0.568314  |
| H | 1.231818  | 3.490787  | 0.846491  |
| H | 4.491371  | 2.906756  | 0.456532  |
| C | -1.137912 | 0.192159  | 1.363568  |
| C | 0.122872  | -0.080758 | 1.038380  |

|   |           |           |           |
|---|-----------|-----------|-----------|
| H | -2.036363 | 0.575209  | 0.886999  |
| H | 0.839945  | -0.480955 | 1.751997  |
| C | 3.352499  | -0.099289 | 2.626073  |
| C | 3.267594  | -1.294203 | 2.644982  |
| H | 3.430372  | 0.965772  | 2.618364  |
| H | 3.200193  | -2.359034 | 2.679044  |
| C | -3.361964 | -2.602714 | 0.240578  |
| C | -2.882446 | -3.662755 | -0.044746 |
| H | -3.830512 | -1.674194 | 0.483633  |
| H | -2.483090 | -4.621074 | -0.294258 |
| C | 0.684404  | -3.398451 | 0.472354  |
| C | 1.766931  | -3.581026 | -0.006350 |
| H | -0.286130 | -3.259702 | 0.896476  |
| H | 2.730215  | -3.774042 | -0.423215 |
| C | 2.300565  | 0.806934  | -1.980342 |
| C | 1.945637  | -0.349644 | -2.330812 |
| H | 2.704995  | 1.801930  | -2.046941 |
| H | 1.785761  | -1.197459 | -2.973746 |
| C | -1.310839 | -0.452527 | -3.473640 |
| C | -1.536326 | -1.294192 | -2.650412 |
| H | -1.125990 | 0.280566  | -4.227496 |
| H | -1.771784 | -2.047424 | -1.926992 |
| C | 0.532079  | 0.168565  | -0.300240 |
| C | 1.813963  | -0.094627 | -0.791833 |
| H | -0.199725 | 0.586025  | -0.989730 |
| H | 2.550157  | -0.522071 | -0.118905 |

DEC 16

1 2

|   |           |          |           |
|---|-----------|----------|-----------|
| C | -0.938110 | 2.179200 | 0.797943  |
| C | 0.139332  | 1.851158 | 0.388076  |
| H | -1.903646 | 2.472428 | 1.151596  |
| H | 1.103651  | 1.566729 | 0.028159  |
| C | 1.164724  | 3.060758 | -2.724310 |
| C | 1.233340  | 2.075190 | -3.401769 |
| H | 1.092252  | 3.936984 | -2.115423 |
| H | 1.281252  | 1.199952 | -4.008373 |
| C | 1.701725  | 3.246531 | 3.282604  |
| C | 2.608434  | 3.878340 | 3.745062  |
| H | 0.891661  | 2.692172 | 2.856465  |
| H | 3.412308  | 4.440372 | 4.162656  |
| C | 3.792990  | 1.910065 | -0.468124 |
| C | 3.868221  | 1.757255 | 0.717418  |
| H | 3.703927  | 2.053397 | -1.522407 |
| H | 3.925990  | 1.631730 | 1.775363  |
| C | -3.714576 | 1.717026 | -2.916402 |
| C | -2.617498 | 1.900702 | -2.472938 |
| H | -4.690500 | 1.546155 | -3.308507 |
| H | -1.641220 | 2.068354 | -2.071625 |
| C | -2.271483 | 1.813996 | 4.463212  |
| C | -1.922658 | 2.938948 | 4.247643  |
| H | -2.573861 | 0.810308 | 4.656632  |
| H | -1.611191 | 3.939128 | 4.036223  |
| C | 2.273707  | 5.188699 | 0.104189  |
| C | 1.767028  | 6.169697 | -0.360022 |
| H | 2.725756  | 4.310904 | 0.512669  |
| H | 1.306838  | 7.037733 | -0.774409 |
| C | -1.787835 | 6.075481 | 2.341815  |
| C | -0.602444 | 5.918317 | 2.418238  |
| H | -2.843846 | 6.201086 | 2.255635  |
| H | 0.453901  | 5.767705 | 2.472131  |
| C | -1.738164 | 5.225612 | -2.370492 |

|   |           |          |           |
|---|-----------|----------|-----------|
| C | -1.481074 | 5.320916 | -1.204432 |
| H | -1.966971 | 5.120788 | -3.406250 |
| H | -1.251803 | 5.396997 | -0.162862 |
| C | -4.195864 | 3.687710 | 0.483830  |
| C | -4.397928 | 3.523328 | 1.653149  |
| H | -3.995108 | 3.816612 | -0.557909 |
| H | -4.563570 | 3.362296 | 2.694460  |

DEC 17

1 2

|   |           |           |           |
|---|-----------|-----------|-----------|
| C | 1.590704  | 1.203729  | 1.532837  |
| C | 1.954112  | 0.844329  | 0.448452  |
| H | 1.287310  | 1.510965  | 2.511639  |
| H | 2.314645  | 0.530783  | -0.507941 |
| C | 0.393037  | 2.881545  | -2.567491 |
| C | -0.782179 | 3.246910  | -2.865664 |
| H | 1.464045  | 2.802464  | -2.667906 |
| H | -1.541899 | 3.752464  | -3.435895 |
| C | -0.367853 | 2.129201  | 4.438861  |
| C | 0.442821  | 2.938747  | 4.789783  |
| H | -1.075832 | 1.392881  | 4.123398  |
| H | 1.170559  | 3.644084  | 5.125525  |
| C | 3.921814  | 1.810027  | -2.517784 |
| C | 3.440463  | 0.929983  | -3.172576 |
| H | 4.363831  | 2.595239  | -1.944657 |
| H | 3.044114  | 0.141558  | -3.772909 |
| C | -0.906979 | 2.749547  | -0.355559 |
| C | -0.711286 | 2.256763  | -1.680442 |
| H | -1.335041 | 2.053567  | 0.366131  |
| H | -0.990467 | 1.221408  | -1.852025 |
| C | -4.142412 | 4.015394  | 3.229331  |
| C | -3.668916 | 3.466145  | 4.182617  |
| H | -4.595509 | 4.514462  | 2.401925  |
| H | -3.268187 | 2.985391  | 5.047591  |
| C | 2.932698  | 5.309160  | -0.887008 |
| C | 2.786460  | 4.348757  | -0.185711 |
| H | 3.083893  | 6.168085  | -1.502374 |
| H | 2.669711  | 3.483759  | 0.431987  |
| C | -0.612494 | 4.033522  | 0.093781  |
| C | -0.881855 | 4.352970  | 1.402269  |
| H | -0.158348 | 4.762875  | -0.567745 |
| H | -1.332770 | 3.604394  | 2.051223  |
| C | -2.792467 | 0.544381  | 2.098348  |
| C | -1.793105 | -0.075285 | 1.866563  |
| H | -3.689230 | 1.081438  | 2.318978  |
| H | -0.908129 | -0.638029 | 1.663585  |
| C | -0.958287 | 5.902131  | 3.228268  |
| C | -0.604414 | 5.641598  | 1.979786  |
| H | -1.456232 | 5.393190  | 4.044417  |
| H | -0.109105 | 6.392400  | 1.366959  |

DEC 18

1 2

|   |           |           |           |
|---|-----------|-----------|-----------|
| C | 1.101195  | -2.539866 | 0.384301  |
| C | -0.136675 | -2.756120 | 0.480297  |
| H | 2.166478  | -2.656343 | 0.524182  |
| H | -1.044532 | -3.247449 | 0.785785  |
| C | 0.271320  | -0.567753 | -4.172576 |
| C | 0.063300  | 0.523798  | -3.724337 |
| H | 0.455504  | -1.526208 | -4.605014 |
| H | -0.116437 | 1.506129  | -3.342735 |

|   |           |           |           |
|---|-----------|-----------|-----------|
| C | 0.111356  | 0.129690  | 1.456169  |
| C | 0.027557  | 1.421604  | 1.762623  |
| H | 0.197559  | -0.633253 | 2.224276  |
| H | -0.059640 | 2.358583  | 1.223928  |
| C | -3.173033 | -1.638734 | 1.720369  |
| C | -2.863204 | -2.033257 | 2.808589  |
| H | -3.465447 | -1.284063 | 0.755145  |
| H | -2.618208 | -2.394512 | 3.782963  |
| C | 4.721928  | -2.388990 | 0.656609  |
| C | 4.461165  | -2.563008 | 1.812552  |
| H | 4.979405  | -2.232126 | -0.367213 |
| H | 4.264319  | -2.728108 | 2.848222  |
| C | 0.684776  | 3.280298  | -1.281243 |
| C | -0.502085 | 3.430070  | -1.357276 |
| H | 1.744492  | 3.154888  | -1.226659 |
| H | -1.555591 | 3.578909  | -1.447075 |
| C | 2.957627  | 0.466525  | -1.529926 |
| C | 3.434838  | 0.626214  | -0.442228 |
| H | 2.538657  | 0.328696  | -2.503868 |
| H | 3.891145  | 0.760847  | 0.513502  |
| C | -2.994858 | 1.919242  | 2.723213  |
| C | -2.810411 | 3.076338  | 2.472671  |
| H | -3.175186 | 0.891265  | 2.953005  |
| H | -2.666888 | 4.116534  | 2.280489  |
| C | -2.838650 | 0.295906  | -1.738737 |
| C | -3.029655 | 0.944738  | -0.748986 |
| H | -2.681209 | -0.262537 | -2.635522 |
| H | -3.217804 | 1.523880  | 0.131250  |
| C | 0.203983  | -1.536309 | -0.427822 |
| C | 0.081807  | -0.232177 | 0.079925  |
| H | 0.146504  | -1.650335 | -1.504913 |
| H | -0.039519 | 0.577981  | -0.636528 |

DEC 19

1 2

|   |           |           |           |
|---|-----------|-----------|-----------|
| C | 0.304289  | 0.572754  | -0.941108 |
| C | -0.816923 | 1.408453  | -1.219894 |
| H | 0.349063  | -0.409064 | -0.476529 |
| H | -1.887110 | 1.292533  | -1.321659 |
| C | 4.247162  | -0.244111 | -1.106173 |
| C | 4.837809  | 0.738000  | -1.456564 |
| H | 3.737228  | -1.128206 | -0.786016 |
| H | 5.391319  | 1.594069  | -1.774082 |
| C | -1.856782 | -2.087527 | 0.045220  |
| C | -2.658955 | -1.636003 | -0.722765 |
| H | -1.148034 | -2.504868 | 0.727791  |
| H | -3.392781 | -1.240180 | -1.391882 |
| C | 1.263848  | 1.629384  | -0.921382 |
| C | 0.074016  | 2.351341  | -0.645724 |
| H | 2.318435  | 1.711381  | -0.708783 |
| H | -0.114087 | 3.161506  | 0.053431  |
| C | 1.353286  | -0.872285 | -3.309203 |
| C | 0.297738  | -1.401194 | -3.099645 |
| H | 2.299891  | -0.422666 | -3.517987 |
| H | -0.635759 | -1.890462 | -2.923683 |
| C | 3.685398  | 0.190948  | 3.640933  |
| C | 4.164438  | 0.270915  | 2.545824  |
| H | 3.284218  | 0.121169  | 4.627872  |
| H | 4.623215  | 0.335894  | 1.583215  |
| C | 1.663539  | -2.754052 | -0.023156 |
| C | 1.900148  | -2.176119 | 1.000246  |
| H | 1.464866  | -3.284906 | -0.928027 |

|   |           |           |           |
|---|-----------|-----------|-----------|
| H | 2.139751  | -1.680812 | 1.917087  |
| C | -4.490647 | 1.358342  | -1.332551 |
| C | -4.260150 | 1.444495  | -2.505463 |
| H | -4.713783 | 1.275850  | -0.289277 |
| H | -4.089701 | 1.532170  | -3.555552 |
| C | 0.407969  | 0.971264  | 2.420266  |
| C | -0.773421 | 0.797944  | 2.308822  |
| H | 1.460940  | 1.106230  | 2.556309  |
| H | -1.831832 | 0.645938  | 2.244378  |
| C | -4.484424 | 1.108914  | 2.486574  |
| C | -4.387586 | -0.014684 | 2.082738  |
| H | -4.590124 | 2.100099  | 2.868294  |
| H | -4.310680 | -1.020732 | 1.733742  |

DEC 20

1 2

|   |           |           |           |
|---|-----------|-----------|-----------|
| C | 0.976421  | 1.724873  | 1.123014  |
| C | 1.379431  | 2.158112  | 2.412161  |
| H | 1.128896  | 0.853432  | 0.505026  |
| H | 2.104920  | 1.742977  | 3.105590  |
| C | -0.629632 | 4.132568  | -4.688393 |
| C | -0.999645 | 3.048093  | -4.339831 |
| H | -0.311744 | 5.100676  | -5.006588 |
| H | -1.349150 | 2.080982  | -4.055912 |
| C | 0.951901  | 3.137894  | 0.910172  |
| C | 0.849720  | 3.468629  | 2.295720  |
| H | 1.329846  | 3.725913  | 0.076998  |
| H | 0.855147  | 4.379490  | 2.871619  |
| C | 4.517300  | 2.497271  | 1.283531  |
| C | 4.596405  | 3.371297  | 2.099717  |
| H | 4.467347  | 1.708350  | 0.562080  |
| H | 4.712275  | 4.135053  | 2.836590  |
| C | -2.054994 | 1.166185  | 3.047437  |
| C | -2.058491 | 2.213677  | 3.628203  |
| H | -2.083832 | 0.220764  | 2.553052  |
| H | -2.095999 | 3.133252  | 4.168841  |
| C | 3.180562  | 0.325458  | -1.347520 |
| C | 3.293449  | -0.639865 | -0.646782 |
| H | 3.098513  | 1.181340  | -1.982517 |
| H | 3.409165  | -1.519321 | -0.052942 |
| C | -1.699058 | 3.498671  | 0.129276  |
| C | -1.206009 | 4.058467  | -0.811631 |
| H | -2.162279 | 3.003655  | 0.956933  |
| H | -0.807001 | 4.573226  | -1.661733 |
| C | 2.201926  | 3.791215  | -2.470515 |
| C | 3.138364  | 4.057413  | -1.770254 |
| H | 1.376941  | 3.570073  | -3.118584 |
| H | 3.983414  | 4.298411  | -1.162988 |
| C | -0.717516 | 7.146252  | -2.659008 |
| C | 0.464347  | 6.991662  | -2.541442 |
| H | -1.767695 | 7.297883  | -2.774125 |
| H | 1.519001  | 6.865548  | -2.437245 |
| C | 1.210408  | 6.601515  | 0.794811  |
| C | 2.353776  | 6.471581  | 1.127943  |
| H | 0.199825  | 6.742691  | 0.478680  |
| H | 3.378384  | 6.398068  | 1.415374  |

EICO 1

1 2

|   |          |          |           |
|---|----------|----------|-----------|
| C | 4.391113 | 5.326055 | 10.246044 |
|---|----------|----------|-----------|



|   |          |           |           |
|---|----------|-----------|-----------|
| C | 5.531264 | 5.670584  | 10.385625 |
| H | 3.370684 | 5.020604  | 10.142717 |
| H | 6.552096 | 5.956146  | 10.524836 |
| C | 2.282537 | 9.658657  | 10.508928 |
| C | 3.118761 | 8.814731  | 10.661735 |
| H | 1.539687 | 10.416465 | 10.398312 |
| H | 3.861854 | 8.061492  | 10.813984 |
| C | 9.409128 | 6.587980  | 10.081143 |
| C | 9.005294 | 5.541360  | 9.660222  |
| H | 9.786230 | 7.508565  | 10.466582 |
| H | 8.643253 | 4.600645  | 9.301976  |
| C | 8.018680 | 1.994943  | 8.708727  |
| C | 6.951449 | 2.389837  | 9.084073  |
| H | 8.967666 | 1.625526  | 8.389279  |
| H | 5.998356 | 2.721925  | 9.438335  |
| C | 0.750191 | 4.504979  | 9.765383  |
| C | 0.871613 | 5.696221  | 9.721682  |
| H | 0.642307 | 3.444441  | 9.821773  |
| H | 0.982421 | 6.758381  | 9.701192  |
| C | 6.718708 | 8.551038  | 8.597122  |
| C | 6.008050 | 9.517082  | 8.603985  |
| H | 7.357784 | 7.693150  | 8.614348  |
| H | 5.376878 | 10.378633 | 8.632585  |
| C | 3.047046 | 3.492477  | 2.190247  |
| C | 4.194034 | 3.839192  | 2.187166  |
| H | 2.027920 | 3.174628  | 2.184438  |
| H | 5.218029 | 4.146701  | 2.167235  |
| C | 6.512785 | 1.828135  | 4.042106  |
| C | 6.765541 | 2.095396  | 5.182668  |
| H | 6.293509 | 1.564851  | 3.031463  |
| H | 6.989880 | 2.308943  | 6.206712  |
| C | 4.175039 | 8.241293  | 0.833838  |
| C | 3.705490 | 7.153803  | 1.019544  |
| H | 4.585657 | 9.207907  | 0.641990  |
| H | 3.296104 | 6.177252  | 1.176177  |
| C | 3.267477 | 1.720478  | 9.450078  |
| C | 3.370311 | 1.957795  | 10.619319 |
| H | 3.177579 | 1.505602  | 8.408912  |
| H | 3.463570 | 2.156137  | 11.663530 |
| C | 2.227904 | 7.457026  | 6.814134  |
| C | 3.182377 | 7.326021  | 7.527764  |
| H | 1.366147 | 7.544502  | 6.188040  |
| H | 4.017567 | 7.203592  | 8.186188  |
| C | 8.281084 | 9.185722  | 5.438159  |
| C | 8.319299 | 8.453345  | 4.489878  |
| H | 8.259588 | 9.833927  | 6.286614  |
| H | 8.369176 | 7.793310  | 3.650527  |
| C | 3.119675 | 10.958924 | 7.093245  |
| C | 3.427919 | 12.004419 | 6.594808  |
| H | 2.846343 | 10.031549 | 7.551399  |
| H | 3.688201 | 12.947632 | 6.167985  |
| C | 7.483833 | 5.694291  | 6.572071  |
| C | 6.436161 | 5.210694  | 6.897358  |
| H | 8.420409 | 6.132912  | 6.305076  |
| H | 5.506663 | 4.767307  | 7.187948  |
| C | 5.011165 | 6.975802  | 4.382151  |
| C | 4.004819 | 7.887724  | 3.962071  |
| H | 5.111328 | 5.907732  | 4.481752  |
| H | 2.940445 | 7.733196  | 3.800374  |
| C | 1.554030 | 10.000863 | 2.613492  |
| C | 1.504904 | 10.423358 | 3.733479  |
| H | 1.590698 | 9.633332  | 1.611944  |
| H | 1.462701 | 10.821857 | 4.723824  |

|   |           |           |          |
|---|-----------|-----------|----------|
| C | 3.491269  | 3.349056  | 5.905742 |
| C | 2.826703  | 3.917870  | 6.727042 |
| H | 4.092357  | 2.832674  | 5.186838 |
| H | 2.227563  | 4.415912  | 7.461378 |
| C | 7.572153  | 5.133312  | 2.849937 |
| C | 7.256678  | 5.862716  | 1.952380 |
| H | 7.838740  | 4.460790  | 3.637704 |
| H | 6.977333  | 6.496814  | 1.139702 |
| C | 0.532409  | 6.601576  | 3.437547 |
| C | 1.172805  | 5.764318  | 4.008597 |
| H | -0.055089 | 7.338585  | 2.936460 |
| H | 1.732721  | 5.015180  | 4.529562 |
| C | 4.722824  | 9.064947  | 4.308627 |
| C | 5.371603  | 8.117434  | 5.150930 |
| H | 4.509353  | 10.120615 | 4.342929 |
| H | 5.682343  | 8.196894  | 6.190899 |

## EICO 2

1 2

|   |          |           |           |
|---|----------|-----------|-----------|
| C | 4.097708 | 5.526044  | 10.558401 |
| C | 5.128466 | 6.254277  | 10.579944 |
| H | 3.513609 | 4.620241  | 10.606098 |
| H | 6.171324 | 6.518969  | 10.655740 |
| C | 3.559532 | 7.476441  | 8.997945  |
| C | 3.801262 | 7.031571  | 10.313819 |
| H | 2.990136 | 8.396937  | 8.880819  |
| H | 3.377324 | 7.622288  | 11.119454 |
| C | 8.703017 | 7.118624  | 9.720121  |
| C | 8.361087 | 6.082483  | 9.224615  |
| H | 9.022922 | 8.036997  | 10.160295 |
| H | 8.059286 | 5.155802  | 8.785101  |
| C | 6.223424 | 3.874666  | 7.170562  |
| C | 5.855850 | 3.378837  | 8.198626  |
| H | 6.561969 | 4.289410  | 6.241887  |
| H | 5.525457 | 2.913098  | 9.100562  |
| C | 0.474518 | 5.911127  | 9.113283  |
| C | 0.339925 | 6.888460  | 8.433047  |
| H | 0.571615 | 5.027187  | 9.705054  |
| H | 0.204172 | 7.743717  | 7.805983  |
| C | 6.179629 | 9.374334  | 8.818597  |
| C | 5.700385 | 10.120605 | 9.624524  |
| H | 6.609301 | 8.714891  | 8.094352  |
| H | 5.282952 | 10.795669 | 10.338486 |
| C | 3.171474 | 3.438733  | 1.964627  |
| C | 4.339033 | 3.700316  | 2.029949  |
| H | 2.133279 | 3.202312  | 1.897813  |
| H | 5.379873 | 3.940929  | 2.084774  |
| C | 4.731017 | 0.880191  | 4.253957  |
| C | 5.164616 | 0.830440  | 5.369251  |
| H | 4.345929 | 0.930587  | 3.259691  |
| H | 5.553503 | 0.778251  | 6.360877  |
| C | 7.151302 | 6.346178  | 0.706606  |
| C | 5.963537 | 6.371715  | 0.553506  |
| H | 8.210754 | 6.333619  | 0.839520  |
| H | 4.905682 | 6.384666  | 0.414494  |
| C | 2.407479 | 2.759440  | 9.114274  |
| C | 2.284056 | 2.340734  | 10.230933 |
| H | 2.504488 | 3.115259  | 8.108267  |
| H | 2.160571 | 1.938035  | 11.211903 |
| C | 3.720823 | 7.424745  | 6.654665  |
| C | 4.006114 | 6.834900  | 7.813316  |
| H | 3.213316 | 8.322080  | 6.312188  |
| H | 4.561688 | 5.900471  | 7.854380  |

|   |           |           |           |
|---|-----------|-----------|-----------|
| C | 9.621459  | 7.848769  | 2.985327  |
| C | 10.383580 | 6.927748  | 2.910057  |
| H | 8.946850  | 8.675027  | 3.048955  |
| H | 11.071964 | 6.115472  | 2.842811  |
| C | 2.307856  | 10.850742 | 8.784022  |
| C | 1.497413  | 10.532732 | 9.607921  |
| H | 3.026073  | 11.137486 | 8.044120  |
| H | 0.769618  | 10.271699 | 10.344147 |
| C | 7.603756  | 7.504212  | 5.961931  |
| C | 6.638859  | 7.640177  | 5.262616  |
| H | 8.473084  | 7.375629  | 6.569409  |
| H | 5.801174  | 7.756131  | 4.605842  |
| C | 3.663868  | 8.162153  | 3.067214  |
| C | 3.454336  | 6.998444  | 3.268361  |
| H | 3.881347  | 9.191703  | 2.881556  |
| H | 3.277050  | 5.954873  | 3.422783  |
| C | 0.742306  | 8.896282  | 5.154556  |
| C | 0.424773  | 9.683855  | 6.000290  |
| H | 1.032688  | 8.214974  | 4.383805  |
| H | 0.138186  | 10.391720 | 6.746637  |
| C | 6.623812  | 10.706781 | 2.711658  |
| C | 6.583696  | 9.691214  | 2.077276  |
| H | 6.658112  | 11.622078 | 3.257908  |
| H | 6.548790  | 8.785912  | 1.507198  |
| C | 7.759852  | 4.525991  | 3.762334  |
| C | 7.417485  | 3.384656  | 3.893729  |
| H | 8.085666  | 5.536941  | 3.641399  |
| H | 7.102034  | 2.370606  | 4.011712  |
| C | 1.991151  | 4.575630  | 5.945527  |
| C | 2.893438  | 3.895567  | 5.543457  |
| H | 1.180109  | 5.161047  | 6.320320  |
| H | 3.680395  | 3.269030  | 5.177753  |
| C | 3.706402  | 11.035587 | 5.375528  |
| C | 4.791306  | 10.785197 | 5.818628  |
| H | 2.741064  | 11.255649 | 4.976130  |
| H | 5.764794  | 10.573496 | 6.202006  |

# EICO 3

1 2

|   |          |           |           |
|---|----------|-----------|-----------|
| C | 4.383527 | 5.882568  | 9.918952  |
| C | 5.327195 | 6.621878  | 9.978605  |
| H | 3.571448 | 5.189677  | 9.859339  |
| H | 6.186791 | 7.257973  | 10.041424 |
| C | 1.765158 | 8.011988  | 8.723959  |
| C | 2.893248 | 8.388661  | 9.327193  |
| H | 1.085917 | 7.320596  | 9.217223  |
| H | 3.749396 | 9.028484  | 9.138029  |
| C | 8.597239 | 8.604923  | 9.811378  |
| C | 8.629174 | 7.522248  | 9.298927  |
| H | 8.582011 | 9.569302  | 10.266491 |
| H | 8.649805 | 6.555745  | 8.840384  |
| C | 8.887068 | 4.285849  | 7.601867  |
| C | 7.853985 | 3.802448  | 7.969526  |
| H | 9.802205 | 4.731247  | 7.275097  |
| H | 6.934162 | 3.357227  | 8.282987  |
| C | 0.966623 | 4.067459  | 9.157673  |
| C | 1.336950 | 4.469397  | 8.090616  |
| H | 0.646727 | 3.688656  | 10.103467 |
| H | 1.676258 | 4.808341  | 7.134022  |
| C | 5.847404 | 9.803785  | 7.895216  |
| C | 5.428614 | 10.826976 | 8.358754  |
| H | 6.253154 | 8.904211  | 7.478753  |
| H | 5.086907 | 11.751823 | 8.767558  |

|   |           |           |           |
|---|-----------|-----------|-----------|
| C | -0.140639 | 4.928531  | 4.729762  |
| C | 0.678922  | 4.224424  | 4.212243  |
| H | -0.886663 | 5.538097  | 5.191104  |
| H | 1.391872  | 3.578389  | 3.749297  |
| C | 1.814344  | 1.502528  | 6.091804  |
| C | 2.779963  | 0.962561  | 5.632490  |
| H | 0.945201  | 1.967334  | 6.500839  |
| H | 3.637740  | 0.473863  | 5.226302  |
| C | 6.466517  | 7.045747  | 2.035667  |
| C | 6.032334  | 6.019858  | 2.476157  |
| H | 6.855771  | 7.957527  | 1.641076  |
| H | 5.670157  | 5.096912  | 2.875885  |
| C | 4.308530  | 2.244071  | 8.899842  |
| C | 4.920135  | 2.533197  | 9.888469  |
| H | 3.758164  | 1.964786  | 8.026918  |
| H | 5.468304  | 2.784558  | 10.768673 |
| C | 3.411139  | 6.307129  | 5.377430  |
| C | 3.962736  | 6.230799  | 6.439806  |
| H | 2.935858  | 6.366136  | 4.419919  |
| H | 4.465146  | 6.143801  | 7.381578  |
| C | 11.543854 | 7.112723  | 7.300915  |
| C | 11.336512 | 6.686044  | 6.201236  |
| H | 11.731886 | 7.496472  | 8.278263  |
| H | 11.146295 | 6.294183  | 5.225841  |
| C | 2.087960  | 9.389242  | 6.616186  |
| C | 1.372215  | 8.522784  | 7.455778  |
| H | 3.102282  | 9.684675  | 6.868977  |
| H | 0.381208  | 8.224300  | 7.110750  |
| C | 7.994912  | 7.716060  | 5.906010  |
| C | 7.304456  | 6.743392  | 5.786331  |
| H | 8.638053  | 8.559889  | 6.025169  |
| H | 6.719040  | 5.855511  | 5.674703  |
| C | 2.687608  | 7.527293  | 2.101279  |
| C | 1.562249  | 7.125805  | 2.198832  |
| H | 3.698913  | 7.861919  | 2.012039  |
| H | 0.567303  | 6.744938  | 2.264602  |
| C | 1.203281  | 10.375457 | 5.775534  |
| C | 1.673603  | 9.413201  | 5.109376  |
| H | 0.702885  | 11.309047 | 5.961011  |
| H | 1.914242  | 8.828429  | 4.233968  |
| C | 6.441430  | 3.214655  | 4.861382  |
| C | 5.260748  | 3.274841  | 5.058142  |
| H | 7.496887  | 3.174412  | 4.694962  |
| H | 4.212090  | 3.309251  | 5.249944  |
| C | 9.401621  | 4.825647  | 3.546917  |
| C | 10.169026 | 3.967651  | 3.878345  |
| H | 8.711666  | 5.584707  | 3.247406  |
| H | 10.858809 | 3.204943  | 4.162735  |
| C | -1.630912 | 6.474319  | 7.602845  |
| C | -2.223572 | 7.370049  | 7.071629  |
| H | -1.113192 | 5.662091  | 8.067979  |
| H | -2.783614 | 8.153385  | 6.611210  |
| C | 4.584543  | 10.372627 | 3.807242  |
| C | 5.085336  | 9.389072  | 4.274490  |
| H | 4.159645  | 11.254586 | 3.383380  |
| H | 5.560811  | 8.517045  | 4.672795  |

#### EICO 4

1 2

|   |          |          |          |
|---|----------|----------|----------|
| C | 2.087491 | 2.675779 | 2.720306 |
| C | 2.909777 | 2.415285 | 1.887698 |
| H | 1.361672 | 2.896440 | 3.471350 |
| H | 3.663173 | 2.181486 | 1.163757 |

|   |           |           |           |
|---|-----------|-----------|-----------|
| C | 5.777396  | 2.233062  | -0.217792 |
| C | 5.831221  | 1.037237  | -0.169024 |
| H | 5.745546  | 3.301398  | -0.240768 |
| H | 5.914348  | -0.026914 | -0.128240 |
| C | -1.012693 | 2.648055  | 0.632446  |
| C | -2.059756 | 2.069498  | 0.722497  |
| H | -0.091034 | 3.184051  | 0.539333  |
| H | -3.006295 | 1.574362  | 0.786366  |
| C | 0.706910  | -4.466365 | 0.387615  |
| C | 1.777965  | -4.181767 | -0.069249 |
| H | -0.245515 | -4.732342 | 0.796517  |
| H | 2.747413  | -3.950649 | -0.454757 |
| C | -4.242276 | -1.157108 | 2.381113  |
| C | -3.893596 | -0.760828 | 3.457247  |
| H | -4.562932 | -1.524023 | 1.427960  |
| H | -3.592091 | -0.411048 | 4.419434  |
| C | -0.912447 | 1.136736  | 4.010865  |
| C | -0.203698 | 0.300248  | 4.493908  |
| H | -1.538829 | 1.882840  | 3.574048  |
| H | 0.429007  | -0.441696 | 4.928233  |
| C | 4.747755  | 5.436380  | 1.267799  |
| C | 5.059275  | 5.985770  | 0.250218  |
| H | 4.471117  | 4.958430  | 2.181311  |
| H | 5.340670  | 6.495333  | -0.644294 |
| C | 2.822779  | -0.995683 | 2.983197  |
| C | 2.362411  | -2.066767 | 2.703193  |
| H | 3.217464  | -0.035855 | 3.237567  |
| H | 1.963964  | -3.023700 | 2.442951  |
| C | -5.128122 | 1.625686  | -1.124255 |
| C | -5.633773 | 1.226660  | -0.114185 |
| H | -4.689015 | 1.997499  | -2.024528 |
| H | -6.102099 | 0.880035  | 0.780289  |
| C | -2.611563 | 3.894923  | -2.453407 |
| C | -2.352682 | 3.427733  | -3.525788 |
| H | -2.842703 | 4.317150  | -1.500709 |
| H | -2.119709 | 3.026216  | -4.486870 |
| C | 0.225451  | -0.439791 | 0.693386  |
| C | 0.862155  | -0.556546 | -0.547063 |
| H | 0.673883  | 0.239375  | 1.417399  |
| H | 0.431692  | -1.194815 | -1.311990 |
| C | 1.906564  | 4.453936  | -1.041470 |
| C | 0.963897  | 4.234990  | -1.749475 |
| H | 2.742606  | 4.687716  | -0.416234 |
| H | 0.115318  | 4.055335  | -2.375512 |
| C | 1.422652  | 2.094211  | -4.390763 |
| C | 0.583373  | 1.247959  | -4.272699 |
| H | 2.167761  | 2.849411  | -4.504943 |
| H | -0.171189 | 0.498969  | -4.172946 |
| C | -2.140360 | 0.046082  | -2.388995 |
| C | -2.258520 | -0.973471 | -3.008716 |
| H | -2.034404 | 0.970166  | -1.860456 |
| H | -2.360364 | -1.885623 | -3.555062 |
| C | 2.410657  | -0.319288 | -0.556269 |
| C | 1.749570  | 0.657611  | -0.998859 |
| H | 3.267909  | -0.922694 | -0.307379 |
| H | 1.561617  | 1.617966  | -1.452706 |
| C | 5.113756  | -2.679020 | 0.378225  |
| C | 5.321501  | -2.679508 | -0.802063 |
| H | 4.934286  | -2.681863 | 1.431527  |
| H | 5.532214  | -2.691438 | -1.848721 |
| C | -1.279565 | -4.697897 | -2.440821 |
| C | -2.421843 | -4.398225 | -2.237308 |
| H | -0.267408 | -4.984635 | -2.618921 |

|   |           |           |           |
|---|-----------|-----------|-----------|
| H | -3.438155 | -4.124140 | -2.048123 |
| C | -2.866942 | -4.560011 | 1.993325  |
| C | -2.737340 | -5.442379 | 1.192933  |
| H | -3.006645 | -3.781314 | 2.711426  |
| H | -2.626906 | -6.232563 | 0.483531  |
| C | -5.211771 | -2.194012 | -1.032417 |
| C | -5.320879 | -3.208579 | -0.403807 |
| H | -5.130651 | -1.276900 | -1.574320 |
| H | -5.417527 | -4.109811 | 0.160357  |
| C | -0.961074 | -1.123218 | 1.105265  |
| C | -1.562700 | -2.032360 | 0.347483  |
| H | -1.369502 | -0.869020 | 2.081016  |
| H | -1.478195 | -2.551719 | -0.599621 |

# EICO 5

1 2

|   |          |           |           |
|---|----------|-----------|-----------|
| C | 4.735817 | 3.868728  | 11.436110 |
| C | 5.782041 | 4.210202  | 10.962240 |
| H | 3.810483 | 3.554744  | 11.866213 |
| H | 6.711068 | 4.521198  | 10.535625 |
| C | 4.531175 | 8.585745  | 9.877637  |
| C | 4.869102 | 7.663723  | 10.565125 |
| H | 4.211919 | 9.413369  | 9.280404  |
| H | 5.156550 | 6.841495  | 11.184117 |
| C | 7.669655 | 6.291848  | 8.454926  |
| C | 7.640438 | 5.211739  | 7.935071  |
| H | 7.713605 | 7.262848  | 8.901009  |
| H | 7.614271 | 4.251415  | 7.467412  |
| C | 4.365004 | 4.675407  | 6.673847  |
| C | 4.273981 | 3.855773  | 7.717749  |
| H | 4.346087 | 4.309347  | 5.650779  |
| H | 4.300237 | 3.934408  | 8.798776  |
| C | 3.481750 | 1.639447  | 4.580774  |
| C | 2.864674 | 1.581638  | 5.607084  |
| H | 4.005670 | 1.697647  | 3.650994  |
| H | 2.310822 | 1.529187  | 6.520157  |
| C | 8.414296 | 9.881472  | 7.869262  |
| C | 7.682326 | 10.040172 | 8.804267  |
| H | 9.073605 | 9.747647  | 7.039944  |
| H | 7.048638 | 10.189055 | 9.650042  |
| C | 3.374728 | 3.643473  | 1.490085  |
| C | 4.557429 | 3.733141  | 1.659311  |
| H | 2.323786 | 3.556738  | 1.325678  |
| H | 5.613606 | 3.806193  | 1.799939  |
| C | 5.932132 | 1.358854  | 7.548541  |
| C | 6.643412 | 1.541126  | 8.496021  |
| H | 5.292600 | 1.173472  | 6.712045  |
| H | 7.271792 | 1.675755  | 9.347980  |
| C | 8.071558 | 6.278627  | 1.123086  |
| C | 6.942106 | 6.359611  | 0.732010  |
| H | 9.080383 | 6.201136  | 1.462768  |
| H | 5.935702 | 6.432205  | 0.383391  |
| C | 1.494767 | 2.916981  | 9.072020  |
| C | 2.146374 | 1.943156  | 9.322815  |
| H | 0.914531 | 3.788225  | 8.859095  |
| H | 2.722039 | 1.073394  | 9.551445  |
| C | 1.322933 | 6.514469  | 7.612221  |
| C | 1.648119 | 6.864689  | 8.711722  |
| H | 1.040301 | 6.193210  | 6.631267  |
| H | 1.945445 | 7.175133  | 9.689096  |
| C | 8.322278 | 8.360520  | 4.263941  |
| C | 8.560745 | 7.524661  | 5.089640  |
| H | 8.124472 | 9.103005  | 3.519218  |

|   |          |           |          |
|---|----------|-----------|----------|
| H | 8.768802 | 6.778685  | 5.825672 |
| C | 2.706034 | 11.363482 | 7.721660 |
| C | 2.046463 | 10.835004 | 8.569682 |
| H | 3.276540 | 11.858727 | 6.968121 |
| H | 1.448965 | 10.385652 | 9.330884 |
| C | 4.669889 | 7.024247  | 5.920150 |
| C | 4.517525 | 6.065389  | 6.926111 |
| H | 4.714609 | 6.701832  | 4.884572 |
| H | 4.507721 | 6.406970  | 7.959364 |
| C | 4.480129 | 8.345901  | 2.390612 |
| C | 3.847301 | 7.329379  | 2.453635 |
| H | 5.058396 | 9.241301  | 2.302338 |
| H | 3.291337 | 6.417267  | 2.503817 |
| C | 1.355597 | 9.393031  | 4.246190 |
| C | 0.675923 | 9.536502  | 5.222517 |
| H | 1.964325 | 9.258247  | 3.378003 |
| H | 0.068576 | 9.683822  | 6.087605 |
| C | 7.230579 | 11.089911 | 1.684151 |
| C | 7.413702 | 10.017696 | 1.182423 |
| H | 7.081763 | 12.059493 | 2.103308 |
| H | 7.578386 | 9.059318  | 0.738317 |
| C | 7.030613 | 4.556350  | 4.125516 |
| C | 7.085469 | 3.477672  | 4.644860 |
| H | 7.004987 | 5.509548  | 3.640809 |
| H | 7.153101 | 2.517148  | 5.106206 |
| C | 0.979090 | 5.837215  | 4.068546 |
| C | 1.483877 | 4.768814  | 4.270727 |
| H | 0.524854 | 6.788963  | 3.896829 |
| H | 1.917740 | 3.805389  | 4.439330 |
| C | 4.079804 | 8.448310  | 6.221630 |
| C | 5.334781 | 8.381517  | 6.318526 |
| H | 3.088368 | 8.870692  | 6.183634 |
| H | 6.348157 | 8.720975  | 6.452508 |

# EICO 6

1 2

|   |           |           |           |
|---|-----------|-----------|-----------|
| C | 2.666329  | 4.942673  | -0.660032 |
| C | 3.482394  | 5.053090  | 0.210251  |
| H | 1.937893  | 4.857911  | -1.435766 |
| H | 4.215046  | 5.147775  | 0.981537  |
| C | 4.284071  | 0.212632  | -0.902971 |
| C | 4.096455  | 1.339739  | -0.539198 |
| H | 4.443935  | -0.788026 | -1.243588 |
| H | 3.943345  | 2.349374  | -0.220430 |
| C | 5.943139  | 3.016221  | 2.168414  |
| C | 4.933143  | 2.986831  | 2.811180  |
| H | 6.850753  | 3.044303  | 1.608164  |
| H | 4.034726  | 2.951290  | 3.386375  |
| C | 1.104315  | 1.908579  | 2.866657  |
| C | 1.309713  | 2.793868  | 2.084493  |
| H | 0.941501  | 1.109844  | 3.556932  |
| H | 1.528576  | 3.585314  | 1.397355  |
| C | -4.867398 | 2.159109  | -2.387463 |
| C | -4.000691 | 2.929207  | -2.691048 |
| H | -5.639505 | 1.469908  | -2.122727 |
| H | -3.233318 | 3.619669  | -2.964109 |
| C | 4.036039  | -0.378837 | 2.967396  |
| C | 3.416888  | -0.968795 | 3.806835  |
| H | 4.592468  | 0.165016  | 2.233834  |
| H | 2.882890  | -1.486733 | 4.572189  |
| C | -5.305848 | -1.368150 | -1.472643 |
| C | -5.525237 | -0.970698 | -0.363698 |
| H | -5.109221 | -1.715520 | -2.462883 |

|   |           |           |           |
|---|-----------|-----------|-----------|
| H | -5.712098 | -0.622882 | 0.629274  |
| C | -3.220111 | 3.419581  | 1.001840  |
| C | -2.390045 | 3.521923  | 1.860463  |
| H | -3.956286 | 3.343729  | 0.229878  |
| H | -1.650663 | 3.622844  | 2.625003  |
| C | -4.164503 | 0.378726  | 2.960041  |
| C | -4.374571 | -0.781090 | 3.176419  |
| H | -3.985283 | 1.415137  | 2.769620  |
| H | -4.563642 | -1.814257 | 3.368103  |
| C | -0.164483 | 3.175284  | -2.508068 |
| C | -0.646580 | 3.579794  | -1.487600 |
| H | 0.274341  | 2.804576  | -3.408935 |
| H | -1.091014 | 3.937437  | -0.583159 |
| C | 1.039866  | 0.163986  | -4.133575 |
| C | 2.071029  | 0.606816  | -3.712610 |
| H | 0.115431  | -0.225319 | -4.502641 |
| H | 2.990127  | 0.994180  | -3.328901 |
| C | 0.097221  | -2.081546 | 3.083843  |
| C | -0.810064 | -1.393085 | 3.458305  |
| H | 0.899558  | -2.705125 | 2.747911  |
| H | -1.637415 | -0.799846 | 3.784728  |
| C | 2.140947  | -4.286867 | 0.958744  |
| C | 3.055043  | -3.799937 | 1.561657  |
| H | 1.336147  | -4.725447 | 0.408974  |
| H | 3.866851  | -3.366853 | 2.104289  |
| C | -1.060000 | 0.440812  | 0.301178  |
| C | 0.514938  | 0.137219  | -0.380503 |
| H | -0.807815 | 1.161207  | 1.081798  |
| H | 0.672088  | 1.052219  | -0.956047 |
| C | -2.912898 | -3.962094 | 1.829497  |
| C | -3.816082 | -3.806902 | 1.057046  |
| H | -2.119654 | -4.098166 | 2.531288  |
| H | -4.626960 | -3.660826 | 0.376810  |
| C | -0.942781 | -4.370308 | -1.371574 |
| C | -0.040392 | -4.461336 | -2.155802 |
| H | -1.750107 | -4.313896 | -0.671425 |
| H | 0.771509  | -4.550368 | -2.845114 |
| C | -2.048435 | -0.598339 | 0.280714  |
| C | -2.185681 | 0.389486  | -0.582018 |
| H | -2.419942 | -1.510338 | 0.723313  |
| H | -2.750885 | 0.876729  | -1.361200 |
| C | -2.190063 | -1.545637 | -3.601188 |
| C | -2.685530 | -0.525152 | -3.987561 |
| H | -1.755778 | -2.462589 | -3.263096 |
| H | -3.140739 | 0.380398  | -4.325427 |
| C | 0.908310  | -1.210327 | -0.665782 |
| C | 1.427444  | -0.634451 | 0.403197  |
| H | 0.853291  | -2.060798 | -1.325609 |
| H | 2.093636  | -0.662223 | 1.251885  |
| C | 3.531151  | -3.417355 | -2.191265 |
| C | 3.240513  | -2.715987 | -3.118425 |
| H | 3.793113  | -4.041304 | -1.365424 |
| H | 2.988574  | -2.085959 | -3.942840 |

# EICO 7

12

|   |           |           |           |
|---|-----------|-----------|-----------|
| C | -0.777027 | -0.966651 | 1.523574  |
| C | -1.306225 | 0.238294  | 0.980172  |
| H | -1.001414 | -2.000986 | 1.275560  |
| H | -2.155261 | 0.515645  | 0.375657  |
| C | -4.495740 | -0.679357 | -0.454264 |
| C | -4.625971 | 0.453774  | -0.824221 |
| H | -4.382899 | -1.695823 | -0.143274 |



|   |           |           |           |
|---|-----------|-----------|-----------|
| H | -4.765561 | 1.465304  | -1.144183 |
| C | 0.868897  | -1.700080 | -1.408556 |
| C | 1.732368  | -1.931825 | -0.608976 |
| H | 0.117520  | -1.501719 | -2.144427 |
| H | 2.522734  | -2.120393 | 0.086454  |
| C | -5.212217 | 4.210976  | -0.346138 |
| C | -5.142559 | 4.087095  | -1.535563 |
| H | -5.285350 | 4.338673  | 0.710910  |
| H | -5.093996 | 3.984054  | -2.597456 |
| C | 4.133931  | -0.757976 | 2.062635  |
| C | 3.918024  | -1.854067 | 2.497684  |
| H | 4.358480  | 0.208391  | 1.663221  |
| H | 3.738948  | -2.836732 | 2.874314  |
| C | 0.942258  | -3.545052 | 3.417780  |
| C | 0.687135  | -4.108633 | 2.391494  |
| H | 1.172151  | -3.041815 | 4.332484  |
| H | 0.459707  | -4.621085 | 1.482277  |
| C | -2.736296 | -3.940573 | 0.760821  |
| C | -2.327832 | -3.669781 | -0.333105 |
| H | -3.115568 | -4.195464 | 1.725430  |
| H | -1.989844 | -3.432685 | -1.320031 |
| C | -3.213284 | 2.492906  | 2.765237  |
| C | -4.177149 | 1.959185  | 2.293212  |
| H | -2.356033 | 2.970075  | 3.188666  |
| H | -5.034371 | 1.482185  | 1.870861  |
| C | 4.285370  | -1.308740 | -2.896301 |
| C | 5.162452  | -0.706413 | -2.344440 |
| H | 3.517538  | -1.858429 | -3.397963 |
| H | 5.947575  | -0.179469 | -1.846510 |
| C | 1.801688  | -3.590153 | -4.842725 |
| C | 1.575032  | -2.462327 | -5.176132 |
| H | 2.013748  | -4.597486 | -4.562744 |
| H | 1.376034  | -1.454136 | -5.467104 |
| C | 0.400311  | -0.381434 | 2.063133  |
| C | 0.069415  | 0.573903  | 1.060402  |
| H | 1.306093  | -0.734612 | 2.528978  |
| H | 0.717629  | 1.095713  | 0.360813  |
| C | -2.421003 | -1.500706 | -3.281614 |
| C | -1.707945 | -2.234852 | -3.906098 |
| H | -3.071359 | -0.850357 | -2.736145 |
| H | -1.063725 | -2.875374 | -4.469308 |
| C | 0.366521  | 0.950884  | -4.110743 |
| C | 1.552672  | 0.987922  | -3.942544 |
| H | -0.689593 | 0.913411  | -4.273337 |
| H | 2.612944  | 1.012417  | -3.814295 |
| C | 3.091890  | 1.517392  | -0.600615 |
| C | 2.934085  | 2.496071  | 0.074380  |
| H | 3.259736  | 0.642503  | -1.196449 |
| H | 2.804207  | 3.365410  | 0.680209  |
| C | -1.570047 | 3.276013  | -0.798171 |
| C | -0.520272 | 3.033497  | -1.324932 |
| H | -2.519167 | 3.506536  | -0.361212 |
| H | 0.406078  | 2.816220  | -1.813653 |
| C | -3.808374 | 1.567976  | -4.475438 |
| C | -3.081123 | 2.330667  | -3.905913 |
| H | -4.453444 | 0.894790  | -4.994809 |
| H | -2.429653 | 3.008346  | -3.399152 |
| C | 0.660518  | 2.832750  | 3.246718  |
| C | 0.295176  | 3.486919  | 2.310793  |
| H | 0.986539  | 2.254778  | 4.085419  |
| H | -0.028796 | 4.070419  | 1.476346  |
| C | 6.651251  | 1.635609  | 0.198196  |
| C | 7.079260  | 0.608955  | 0.641385  |

|   |           |           |           |
|---|-----------|-----------|-----------|
| H | 6.280492  | 2.553857  | -0.197726 |
| H | 7.469501  | -0.300865 | 1.039146  |
| C | 1.949837  | -0.272227 | 5.323230  |
| C | 0.761052  | -0.350340 | 5.453095  |
| H | 3.010227  | -0.206448 | 5.215126  |
| H | -0.297072 | -0.429200 | 5.577792  |
| C | -2.784750 | -1.130196 | 3.855629  |
| C | -2.251657 | -2.189881 | 4.029686  |
| H | -3.262405 | -0.184424 | 3.708291  |
| H | -1.780663 | -3.134326 | 4.192716  |

# EICO 8

1 2

|   |           |           |           |
|---|-----------|-----------|-----------|
| C | 6.054438  | 1.544232  | -1.041290 |
| C | 5.947956  | 2.507498  | -0.335860 |
| H | 6.165576  | 0.688896  | -1.676334 |
| H | 5.858834  | 3.363529  | 0.296104  |
| C | 2.883289  | 4.658076  | 1.192244  |
| C | 3.322545  | 3.756337  | 1.848579  |
| H | 2.485324  | 5.465998  | 0.617223  |
| H | 3.700242  | 2.952586  | 2.441515  |
| C | 0.280311  | 5.535341  | -1.333926 |
| C | 1.318078  | 5.604810  | -1.929265 |
| H | -0.653264 | 5.478206  | -0.818718 |
| H | 2.225806  | 5.692967  | -2.486434 |
| C | 2.472396  | 2.226726  | -1.472118 |
| C | 2.969763  | 1.859745  | -2.568149 |
| H | 2.871185  | 2.690081  | -0.574166 |
| H | 3.215061  | 1.473156  | -3.543344 |
| C | -2.641135 | 3.166017  | -1.145355 |
| C | -2.242084 | 3.119964  | -0.015369 |
| H | -3.008755 | 3.188065  | -2.150379 |
| H | -1.890747 | 3.076871  | 0.994780  |
| C | -0.024829 | 2.687811  | 2.825410  |
| C | -0.913264 | 2.081306  | 3.354758  |
| H | 0.773372  | 3.238498  | 2.375260  |
| H | -1.697136 | 1.542172  | 3.847179  |
| C | 2.101503  | -1.481426 | -2.743333 |
| C | 2.326948  | -1.820754 | -1.616019 |
| H | 1.923687  | -1.185104 | -3.755057 |
| H | 2.531379  | -2.147773 | -0.617975 |
| C | 2.899841  | -3.519503 | 1.697571  |
| C | 2.591725  | -4.357612 | 0.899382  |
| H | 3.178215  | -2.782625 | 2.417745  |
| H | 2.331064  | -5.117301 | 0.196577  |
| C | 0.852961  | 2.056683  | -1.386791 |
| C | 0.496063  | 0.978404  | -0.860614 |
| H | 0.339032  | 2.927644  | -1.781616 |
| H | 0.287070  | 0.028677  | -0.396511 |
| C | -1.181756 | -1.005897 | 1.516218  |
| C | -0.381302 | -1.875330 | 1.315422  |
| H | -1.917034 | -0.253192 | 1.701130  |
| H | 0.333260  | -2.657446 | 1.167556  |
| C | 2.325581  | 0.216842  | 1.830362  |
| C | 3.357717  | 0.255928  | 1.220835  |
| H | 1.407387  | 0.184034  | 2.377583  |
| H | 4.283993  | 0.313521  | 0.690765  |
| C | 5.728181  | -1.401981 | -3.317263 |
| C | 6.597597  | -0.773742 | -3.851491 |
| H | 4.947545  | -1.964662 | -2.854041 |
| H | 7.380795  | -0.224078 | -4.325101 |
| C | -2.304730 | -0.289185 | -1.904182 |

|   |           |           |           |
|---|-----------|-----------|-----------|
| C | -1.642353 | -0.841240 | -2.736871 |
| H | -2.913297 | 0.180592  | -1.160208 |
| H | -1.070128 | -1.361111 | -3.472201 |
| C | 3.563456  | 5.696430  | -5.007790 |
| C | 2.668628  | 6.489300  | -5.084034 |
| H | 4.371107  | 4.998104  | -4.956706 |
| H | 1.883820  | 7.208537  | -5.157246 |
| C | -4.047562 | 1.806688  | -4.297152 |
| C | -3.790313 | 2.888392  | -4.742172 |
| H | -4.282332 | 0.840490  | -3.909695 |
| H | -3.569012 | 3.846002  | -5.157694 |
| C | 3.421288  | -0.043306 | -5.780783 |
| C | 2.417255  | 0.564630  | -6.026333 |
| H | 4.321209  | -0.580366 | -5.566797 |
| H | 1.524755  | 1.108859  | -6.246721 |
| C | -4.799627 | 0.828533  | 0.849626  |
| C | -4.698999 | -0.359809 | 0.964131  |
| H | -4.897060 | 1.885582  | 0.737146  |
| H | -4.623839 | -1.419340 | 1.071719  |
| C | 6.015975  | 2.951499  | -4.231918 |
| C | 5.567199  | 2.630494  | -5.295554 |
| H | 6.426290  | 3.234457  | -3.287659 |
| H | 5.176800  | 2.347455  | -6.247964 |
| C | -3.818913 | 0.056522  | 4.532799  |
| C | -2.973534 | -0.297349 | 5.303880  |
| H | -4.581956 | 0.359439  | 3.849733  |
| H | -2.235673 | -0.617009 | 6.005905  |
| C | -0.275798 | 2.528394  | -4.469582 |
| C | 0.585718  | 3.329893  | -4.701453 |
| H | -1.069521 | 1.839821  | -4.270588 |
| H | 1.343989  | 4.053655  | -4.919507 |

# EICO 9

1 2

|   |           |           |           |
|---|-----------|-----------|-----------|
| C | -2.687351 | -1.477175 | 1.187204  |
| C | -3.201214 | -0.420696 | 0.950312  |
| H | -2.229995 | -2.419566 | 1.403880  |
| H | -3.673890 | 0.519051  | 0.771442  |
| C | 0.327557  | 4.346748  | -2.849752 |
| C | 0.783381  | 4.647702  | -1.782693 |
| H | -0.074893 | 4.082640  | -3.803394 |
| H | 1.183826  | 4.930433  | -0.830892 |
| C | -4.827586 | -3.789577 | 0.020583  |
| C | -4.450270 | -4.605499 | -0.771678 |
| H | -5.168528 | -3.075536 | 0.739696  |
| H | -4.139464 | -5.339941 | -1.480551 |
| C | -2.103862 | 4.990183  | 0.441264  |
| C | -2.204360 | 4.248139  | 1.377423  |
| H | -2.017999 | 5.657073  | -0.388173 |
| H | -2.305634 | 3.591365  | 2.215632  |
| C | -0.076716 | 0.996175  | -1.594622 |
| C | 0.241450  | 0.006580  | -0.661457 |
| H | 0.701175  | 1.441701  | -2.206763 |
| H | -0.588340 | -0.406204 | -0.089980 |
| C | -0.682075 | -2.443770 | -2.655221 |
| C | -1.729890 | -2.541204 | -2.078944 |
| H | 0.256903  | -2.363692 | -3.163786 |
| H | -2.665269 | -2.643852 | -1.567602 |
| C | 0.454290  | 1.965540  | 2.068376  |
| C | -0.269700 | 1.049682  | 2.341997  |
| H | 1.094204  | 2.794773  | 1.851609  |
| H | -0.913189 | 0.235284  | 2.598858  |

|   |           |           |           |
|---|-----------|-----------|-----------|
| C | 2.537375  | 5.251055  | 1.544028  |
| C | 1.374406  | 5.452076  | 1.749119  |
| H | 3.580726  | 5.097694  | 1.381127  |
| H | 0.337915  | 5.632227  | 1.935118  |
| C | 0.166736  | -3.709470 | 0.724280  |
| C | 0.271628  | -3.459121 | 1.891618  |
| H | 0.053130  | -3.934284 | -0.313479 |
| H | 0.337321  | -3.248483 | 2.936890  |
| C | -1.540265 | 1.001932  | -2.142312 |
| C | -1.335597 | 1.870709  | -1.252849 |
| H | -2.067662 | 0.456582  | -2.908543 |
| H | -1.515876 | 2.705360  | -0.592832 |
| C | 2.458911  | -1.507382 | -4.338218 |
| C | 2.972401  | -2.144854 | -3.462153 |
| H | 1.996602  | -0.949193 | -5.123326 |
| H | 3.431564  | -2.715212 | -2.682267 |
| C | 2.621511  | -0.105946 | -1.044808 |
| C | 1.546135  | -0.520231 | -0.389926 |
| H | 2.923023  | 0.594386  | -1.816183 |
| H | 1.628664  | -1.292050 | 0.371730  |
| C | -3.687960 | 1.512731  | 3.872217  |
| C | -4.504940 | 2.268228  | 3.427945  |
| H | -2.975217 | 0.831869  | 4.286816  |
| H | -5.236555 | 2.949615  | 3.054716  |
| C | 0.723675  | 1.535657  | -5.161154 |
| C | -0.364379 | 1.108644  | -5.426777 |
| H | 1.700917  | 1.908154  | -4.938096 |
| H | -1.332398 | 0.729295  | -5.675374 |
| C | 4.739104  | -2.686267 | -0.205569 |
| C | 3.811066  | -3.347358 | 0.163527  |
| H | 5.585084  | -2.116383 | -0.517854 |
| H | 2.991233  | -3.935507 | 0.513636  |
| C | 4.194044  | 1.718882  | -3.756886 |
| C | 3.636488  | 2.688130  | -3.325674 |
| H | 4.699412  | 0.862449  | -4.146240 |
| H | 3.136680  | 3.559413  | -2.960389 |
| C | -0.951395 | -1.185179 | 4.985643  |
| C | -1.940390 | -1.726163 | 4.577439  |
| H | -0.077125 | -0.704516 | 5.364687  |
| H | -2.832191 | -2.207637 | 4.231913  |
| C | -2.475967 | -5.193935 | 3.939562  |
| C | -2.886692 | -5.181321 | 2.814786  |
| H | -2.112314 | -5.216689 | 4.942342  |
| H | -3.262335 | -5.179141 | 1.814478  |
| C | -5.502779 | -2.964157 | 3.644078  |
| C | -5.474121 | -1.773305 | 3.517662  |
| H | -5.527193 | -4.023802 | 3.766876  |
| H | -5.447916 | -0.710111 | 3.422830  |
| C | -3.424209 | -0.890186 | -4.768370 |
| C | -3.981778 | 0.162233  | -4.896687 |
| H | -2.938104 | -1.833636 | -4.651708 |
| H | -4.498563 | 1.086572  | -5.028596 |

EICO 10

1 2

|   |           |          |           |
|---|-----------|----------|-----------|
| C | -3.142912 | 3.168362 | 0.485010  |
| C | -2.606800 | 3.383133 | -0.566302 |
| H | -3.639967 | 2.983453 | 1.414932  |
| H | -2.131668 | 3.596822 | -1.502230 |
| C | 2.074852  | 1.456009 | -2.073546 |
| C | 1.621941  | 1.932028 | -1.071561 |
| H | 2.499150  | 1.039081 | -2.959378 |
| H | 1.241567  | 2.361255 | -0.168881 |

|   |            |           |           |
|---|------------|-----------|-----------|
| C | -1.891706  | -1.521363 | -1.480535 |
| C | -2.739113  | -0.535231 | -1.066621 |
| H | -2.266938  | -2.542167 | -1.526848 |
| H | -2.416351  | 0.499276  | -1.001444 |
| C | -5.048086  | 0.024156  | -0.311556 |
| C | -4.057117  | -0.880614 | -0.732598 |
| H | -4.791523  | 1.077158  | -0.235280 |
| H | -4.337781  | -1.930064 | -0.799670 |
| C | -8.168348  | -3.549384 | 0.143899  |
| C | -7.324448  | -4.380896 | 0.323928  |
| H | -8.923683  | -2.807201 | -0.005659 |
| H | -6.573954  | -5.124508 | 0.476373  |
| C | -7.703043  | 2.657853  | -0.529153 |
| C | -6.688314  | 3.202172  | -0.861572 |
| H | -8.605059  | 2.164933  | -0.234807 |
| H | -5.782099  | 3.688034  | -1.151488 |
| C | -8.621604  | 0.988453  | -3.497859 |
| C | -8.413375  | -0.143114 | -3.832856 |
| H | -8.805502  | 2.000867  | -3.212588 |
| H | -8.222736  | -1.146454 | -4.144511 |
| C | -4.881751  | 1.373055  | -3.609477 |
| C | -3.710149  | 1.577702  | -3.755956 |
| H | -5.930228  | 1.192858  | -3.503443 |
| H | -2.674228  | 1.792319  | -3.904161 |
| C | 0.868902   | 3.349782  | 2.443593  |
| C | 0.111678   | 4.102131  | 1.900181  |
| H | 1.545168   | 2.683952  | 2.931751  |
| H | -0.558838  | 4.778479  | 1.419120  |
| C | -5.995999  | -2.845218 | -2.876964 |
| C | -5.369069  | -2.169543 | -3.643446 |
| H | -6.556917  | -3.435900 | -2.183207 |
| H | -4.819814  | -1.559276 | -4.326770 |
| C | -7.652966  | -1.024754 | 3.955613  |
| C | -7.984253  | -2.064464 | 3.460017  |
| H | -7.357495  | -0.099839 | 4.400788  |
| H | -8.282289  | -2.991354 | 3.020337  |
| C | -10.208370 | -0.265343 | -0.422161 |
| C | -9.843094  | -0.306469 | 0.718393  |
| H | -10.540589 | -0.224893 | -1.436081 |
| H | -9.527974  | -0.356754 | 1.738489  |
| C | -0.513852  | -1.296160 | -1.861656 |
| C | 0.238491   | -2.292544 | -2.289642 |
| H | -0.108755  | -0.288401 | -1.777728 |
| H | 0.150169   | -3.356617 | -2.470742 |
| C | -3.772035  | -4.872622 | -0.937341 |
| C | -3.566624  | -4.439517 | 0.161027  |
| H | -3.957030  | -5.269834 | -1.910679 |
| H | -3.391116  | -4.049759 | 1.141269  |
| C | -6.171398  | -0.554063 | 0.601169  |
| C | -6.530110  | -0.357486 | -0.593050 |
| H | -6.271726  | -0.800373 | 1.644067  |
| H | -7.198134  | -0.284244 | -1.435114 |
| C | -5.860081  | 2.128300  | 2.667907  |
| C | -4.994111  | 1.613066  | 3.317783  |
| H | -6.616455  | 2.598187  | 2.077317  |
| H | -4.209679  | 1.175120  | 3.899229  |
| C | -4.193567  | -2.157749 | 3.107478  |
| C | -3.161976  | -1.705220 | 2.696669  |
| H | -5.115812  | -2.540497 | 3.487845  |
| H | -2.233223  | -1.296092 | 2.355551  |
| C | -0.470628  | 0.393432  | 1.442857  |
| C | 0.254769   | -0.559594 | 1.422809  |
| H | -1.092771  | 1.261614  | 1.464499  |

|   |           |           |           |
|---|-----------|-----------|-----------|
| H | 0.914659  | -1.397970 | 1.409197  |
| C | -0.464455 | 3.787860  | -3.529181 |
| C | -1.416488 | 4.302969  | -4.042494 |
| H | 0.392498  | 3.340591  | -3.071790 |
| H | -2.252759 | 4.771326  | -4.511721 |
| C | -1.860750 | 0.552676  | 5.102533  |
| C | -1.574580 | 1.627824  | 4.659443  |
| H | -2.106543 | -0.404036 | 5.505874  |
| H | -1.299365 | 2.585864  | 4.275562  |

# EICO 11

1 2

|   |           |           |           |
|---|-----------|-----------|-----------|
| C | -2.294194 | 3.237806  | -3.505799 |
| C | -1.626432 | 4.028147  | -2.900106 |
| H | -2.882130 | 2.527964  | -4.049287 |
| H | -1.016702 | 4.727397  | -2.371951 |
| C | 1.054697  | 3.197221  | -0.268344 |
| C | 0.396807  | 3.982421  | 0.353791  |
| H | 1.647611  | 2.505523  | -0.825404 |
| H | -0.173435 | 4.702437  | 0.901306  |
| C | -2.688242 | -2.650807 | -0.197451 |
| C | -1.873912 | -2.032105 | 0.427429  |
| H | -3.395524 | -3.201741 | -0.779526 |
| H | -1.143111 | -1.483933 | 0.982737  |
| C | -4.840063 | 0.915496  | -1.884465 |
| C | -3.836919 | 0.275833  | -2.039620 |
| H | -5.742068 | 1.475047  | -1.744425 |
| H | -2.931620 | -0.276756 | -2.177375 |
| C | -6.724360 | -1.589490 | -0.379962 |
| C | -7.703187 | -1.813821 | 0.273699  |
| H | -5.859722 | -1.387920 | -0.975165 |
| H | -8.576663 | -2.016518 | 0.852150  |
| C | -8.198209 | 2.667040  | -1.404163 |
| C | -8.397913 | 1.505587  | -1.624232 |
| H | -8.023110 | 3.705043  | -1.226096 |
| H | -8.574308 | 0.473003  | -1.833640 |
| C | -6.039090 | 3.184556  | -4.484133 |
| C | -5.300287 | 3.876811  | -5.124173 |
| H | -6.710621 | 2.568780  | -3.926877 |
| H | -4.648494 | 4.493659  | -5.701494 |
| C | -3.589356 | 0.112985  | -5.406188 |
| C | -2.408695 | -0.080993 | -5.340507 |
| H | -4.642196 | 0.289242  | -5.466498 |
| H | -1.355569 | -0.246742 | -5.292663 |
| C | -2.676407 | 2.524835  | 1.675887  |
| C | -2.639599 | 2.647923  | 0.352816  |
| H | -2.185125 | 3.263188  | 2.305465  |
| H | -2.988242 | 2.165708  | -0.553930 |
| C | -7.786959 | 0.096283  | -4.935460 |
| C | -7.113363 | -0.693851 | -4.337949 |
| H | -8.391401 | 0.789406  | -5.476807 |
| H | -6.515173 | -1.418122 | -3.827762 |
| C | -1.252388 | 2.926910  | 4.947837  |
| C | -2.278615 | 3.298624  | 5.441729  |
| H | -0.334625 | 2.583202  | 4.523706  |
| H | -3.182863 | 3.629668  | 5.902044  |
| C | -0.297407 | 0.637347  | -2.177037 |
| C | 0.061632  | -0.464348 | -1.870117 |
| H | -0.619386 | 1.616487  | -2.466677 |
| H | 0.381267  | -1.448038 | -1.607444 |
| C | -4.420942 | -2.995533 | -3.453100 |
| C | -5.219017 | -3.651841 | -2.846409 |
| H | -3.725189 | -2.412259 | -4.018097 |

|   |           |           |           |
|---|-----------|-----------|-----------|
| H | -5.935518 | -4.242826 | -2.320552 |
| C | -4.176480 | -0.901837 | 2.582499  |
| C | -5.242044 | -0.230535 | 2.539562  |
| H | -3.535729 | -1.744491 | 2.769672  |
| H | -6.291127 | -0.007185 | 2.655627  |
| C | 0.032593  | 0.594376  | 2.276503  |
| C | -0.157851 | -0.132591 | 3.210289  |
| H | 0.215371  | 1.252900  | 1.452853  |
| H | -0.293740 | -0.779175 | 4.048805  |
| C | -4.953223 | 4.494016  | -1.247735 |
| C | -5.321527 | 4.428128  | -0.108086 |
| H | -4.637285 | 4.538912  | -2.268758 |
| H | -5.652041 | 4.374551  | 0.907443  |
| C | -2.485753 | 6.058939  | 1.668141  |
| C | -1.840982 | 6.087386  | 2.678028  |
| H | -3.067988 | 6.038064  | 0.771565  |
| H | -1.268569 | 6.127351  | 3.578645  |
| C | -8.783725 | 0.764770  | 3.242385  |
| C | -8.589678 | 1.098343  | 2.107484  |
| H | -8.987485 | 0.471618  | 4.248485  |
| H | -8.440468 | 1.393238  | 1.088893  |
| C | -6.040462 | 3.405846  | 3.495193  |
| C | -5.088726 | 4.134493  | 3.467522  |
| H | -6.907521 | 2.779985  | 3.516276  |
| H | -4.251022 | 4.798752  | 3.428569  |
| C | -4.060128 | 0.410932  | 1.735511  |
| C | -3.375500 | 1.472973  | 2.338726  |
| H | -4.076979 | 0.328970  | 0.653317  |
| H | -3.360502 | 1.502126  | 3.427958  |

## EICO 12

1 2

|   |           |           |           |
|---|-----------|-----------|-----------|
| C | 1.274121  | 1.804850  | 2.573489  |
| C | 1.887357  | 0.848480  | 2.956643  |
| H | 0.719043  | 2.655130  | 2.235424  |
| H | 2.442580  | 0.007124  | 3.315163  |
| C | -1.901341 | 0.154523  | -0.102251 |
| C | -1.111926 | 0.114288  | 0.884160  |
| H | -2.848071 | 0.049151  | -0.607908 |
| H | -0.771180 | -0.055346 | 1.890229  |
| C | -5.115329 | -1.305498 | -1.131424 |
| C | -5.478875 | -0.399950 | -0.435699 |
| H | -4.802398 | -2.118274 | -1.748971 |
| H | -5.798662 | 0.408448  | 0.186141  |
| C | -4.475843 | 1.834555  | 2.371927  |
| C | -4.927024 | 2.744360  | 1.736668  |
| H | -4.085428 | 1.023272  | 2.947498  |
| H | -5.332653 | 3.563651  | 1.185839  |
| C | -3.296967 | -4.129851 | -0.116760 |
| C | -2.479746 | -4.396062 | -0.952225 |
| H | -4.052077 | -3.918718 | 0.612111  |
| H | -1.771806 | -4.677721 | -1.699245 |
| C | 4.025490  | -1.689088 | 0.343538  |
| C | 4.224536  | -0.507876 | 0.285966  |
| H | 3.868027  | -2.746171 | 0.412535  |
| H | 4.418281  | 0.544121  | 0.263690  |
| C | -1.483718 | 3.838809  | 1.083220  |
| C | -0.575253 | 4.320525  | 0.467682  |
| H | -2.308812 | 3.425057  | 1.623402  |
| H | 0.226859  | 4.755721  | -0.086483 |
| C | 0.422832  | -1.567409 | -1.108465 |
| C | 1.470192  | -2.244084 | -1.675130 |

|   |           |           |           |
|---|-----------|-----------|-----------|
| H | -0.384309 | -2.110362 | -0.629738 |
| H | 2.275817  | -1.678248 | -2.137684 |
| C | -0.476669 | 0.670914  | -0.426135 |
| C | 0.453881  | -0.173615 | -1.083380 |
| H | -0.313770 | 1.740377  | -0.503482 |
| H | 1.288193  | 0.319789  | -1.582222 |
| C | 3.439264  | -5.373766 | 1.218968  |
| C | 4.615395  | -5.143009 | 1.214958  |
| H | 2.393870  | -5.597486 | 1.222220  |
| H | 5.664509  | -4.945467 | 1.210687  |
| C | -0.103450 | -6.704378 | 0.073241  |
| C | 0.747049  | -7.011280 | -0.713079 |
| H | -0.873764 | -6.454717 | 0.767888  |
| H | 1.511220  | -7.298297 | -1.404108 |
| C | 1.589056  | -3.678780 | -1.661346 |
| C | 2.644458  | -4.275772 | -2.190693 |
| H | 0.810869  | -4.263126 | -1.171999 |
| H | 3.575843  | -4.016440 | -2.680673 |
| C | 4.160744  | -7.327384 | -1.845808 |
| C | 3.980902  | -7.721924 | -2.962615 |
| H | 4.317369  | -6.975306 | -0.848634 |
| H | 3.829017  | -8.088641 | -3.952977 |
| C | -0.109273 | -3.291214 | 1.911259  |
| C | 0.997217  | -3.039605 | 2.298407  |
| H | -1.098662 | -3.509079 | 1.570338  |
| H | 1.980444  | -2.829402 | 2.664767  |
| C | -2.777519 | -1.683714 | 3.511692  |
| C | -3.572050 | -1.617005 | 2.617309  |
| H | -2.072957 | -1.756455 | 4.309925  |
| H | -4.294494 | -1.566432 | 1.830820  |
| C | 4.610969  | 2.913392  | 1.496487  |
| C | 5.391353  | 3.173551  | 0.625333  |
| H | 3.916136  | 2.682269  | 2.275200  |
| H | 6.098283  | 3.423106  | -0.134548 |
| C | -6.666945 | -3.526699 | 1.377833  |
| C | -6.150140 | -3.839499 | 2.411605  |
| H | -7.144416 | -3.247470 | 0.465742  |
| H | -5.704680 | -4.115019 | 3.340891  |
| C | 2.342401  | 3.020154  | -1.494729 |
| C | 1.611123  | 3.081113  | -2.441938 |
| H | 3.009669  | 2.994140  | -0.658179 |
| H | 0.970345  | 3.157449  | -3.291883 |
| C | 6.235511  | -4.467848 | -2.212213 |
| C | 6.242340  | -3.338295 | -1.813512 |
| H | 6.230497  | -5.474768 | -2.567677 |
| H | 6.258568  | -2.333687 | -1.454521 |
| C | 4.326318  | -1.843105 | 3.838615  |
| C | 3.626997  | -2.154460 | 4.759721  |
| H | 4.953345  | -1.563171 | 3.021523  |
| H | 3.025321  | -2.438932 | 5.593718  |

# EICO 13

1 2

|   |          |          |           |
|---|----------|----------|-----------|
| C | 6.054438 | 1.544232 | -1.041290 |
| C | 5.947956 | 2.507498 | -0.335860 |
| H | 6.165576 | 0.688896 | -1.676334 |
| H | 5.858834 | 3.363529 | 0.296104  |
| C | 2.883289 | 4.658076 | 1.192244  |
| C | 3.322545 | 3.756337 | 1.848579  |
| H | 2.485324 | 5.465998 | 0.617223  |
| H | 3.700242 | 2.952586 | 2.441515  |
| C | 0.280311 | 5.535341 | -1.333926 |



|   |           |           |           |
|---|-----------|-----------|-----------|
| C | 1.318078  | 5.604810  | -1.929265 |
| H | -0.653264 | 5.478206  | -0.818718 |
| H | 2.225806  | 5.692967  | -2.486434 |
| C | 2.472396  | 2.226726  | -1.472118 |
| C | 2.969763  | 1.859745  | -2.568149 |
| H | 2.871185  | 2.690081  | -0.574166 |
| H | 3.215061  | 1.473156  | -3.543344 |
| C | -2.641135 | 3.166017  | -1.145355 |
| C | -2.242084 | 3.119964  | -0.015369 |
| H | -3.008755 | 3.188065  | -2.150379 |
| H | -1.890747 | 3.076871  | 0.994780  |
| C | -0.024829 | 2.687811  | 2.825410  |
| C | -0.913264 | 2.081306  | 3.354758  |
| H | 0.773372  | 3.238498  | 2.375260  |
| H | -1.697136 | 1.542172  | 3.847179  |
| C | 2.101503  | -1.481426 | -2.743333 |
| C | 2.326948  | -1.820754 | -1.616019 |
| H | 1.923687  | -1.185104 | -3.755057 |
| H | 2.531379  | -2.147773 | -0.617975 |
| C | 2.899841  | -3.519503 | 1.697571  |
| C | 2.591725  | -4.357612 | 0.899382  |
| H | 3.178215  | -2.782625 | 2.417745  |
| H | 2.331064  | -5.117301 | 0.196577  |
| C | 0.852961  | 2.056683  | -1.386791 |
| C | 0.496063  | 0.978404  | -0.860614 |
| H | 0.339032  | 2.927644  | -1.781616 |
| H | 0.287070  | 0.028677  | -0.396511 |
| C | -1.181756 | -1.005897 | 1.516218  |
| C | -0.381302 | -1.875330 | 1.315422  |
| H | -1.917034 | -0.253192 | 1.701130  |
| H | 0.333260  | -2.657446 | 1.167556  |
| C | 2.325581  | 0.216842  | 1.830362  |
| C | 3.357717  | 0.255928  | 1.220835  |
| H | 1.407387  | 0.184034  | 2.377583  |
| H | 4.283993  | 0.313521  | 0.690765  |
| C | 5.728181  | -1.401981 | -3.317263 |
| C | 6.597597  | -0.773742 | -3.851491 |
| H | 4.947545  | -1.964662 | -2.854041 |
| H | 7.380795  | -0.224078 | -4.325101 |
| C | -2.304730 | -0.289185 | -1.904182 |
| C | -1.642353 | -0.841240 | -2.736871 |
| H | -2.913297 | 0.180592  | -1.160208 |
| H | -1.070128 | -1.361111 | -3.472201 |
| C | 3.563456  | 5.696430  | -5.007790 |
| C | 2.668628  | 6.489300  | -5.084034 |
| H | 4.371107  | 4.998104  | -4.956706 |
| H | 1.883820  | 7.208537  | -5.157246 |
| C | -4.047562 | 1.806688  | -4.297152 |
| C | -3.790313 | 2.888392  | -4.742172 |
| H | -4.282332 | 0.840490  | -3.909695 |
| H | -3.569012 | 3.846002  | -5.157694 |
| C | 3.421288  | -0.043306 | -5.780783 |
| C | 2.417255  | 0.564630  | -6.026333 |
| H | 4.321209  | -0.580366 | -5.566797 |
| H | 1.524755  | 1.108859  | -6.246721 |
| C | -4.799627 | 0.828533  | 0.849626  |
| C | -4.698999 | -0.359809 | 0.964131  |
| H | -4.897060 | 1.885582  | 0.737146  |
| H | -4.623839 | -1.419340 | 1.071719  |
| C | 6.015975  | 2.951499  | -4.231918 |
| C | 5.567199  | 2.630494  | -5.295554 |
| H | 6.426290  | 3.234457  | -3.287659 |
| H | 5.176800  | 2.347455  | -6.247964 |

|   |           |           |           |
|---|-----------|-----------|-----------|
| C | -3.818913 | 0.056522  | 4.532799  |
| C | -2.973534 | -0.297349 | 5.303880  |
| H | -4.581956 | 0.359439  | 3.849733  |
| H | -2.235673 | -0.617009 | 6.005905  |
| C | -0.275798 | 2.528394  | -4.469582 |
| C | 0.585718  | 3.329893  | -4.701453 |
| H | -1.069521 | 1.839821  | -4.270588 |
| H | 1.343989  | 4.053655  | -4.919507 |

# EICO 14

1 2

|   |           |           |           |
|---|-----------|-----------|-----------|
| C | 0.313260  | 1.750717  | 0.969247  |
| C | 0.945102  | 1.526412  | 1.962830  |
| H | -0.265934 | 1.942135  | 0.093111  |
| H | 1.501647  | 1.330939  | 2.856503  |
| C | 2.775410  | 0.674568  | -1.800242 |
| C | 3.622496  | -0.172159 | -1.780175 |
| H | 2.020707  | 1.430650  | -1.816744 |
| H | 4.362358  | -0.940331 | -1.741284 |
| C | 1.580465  | 4.665752  | 3.343970  |
| C | 2.655969  | 5.044718  | 3.711941  |
| H | 0.621896  | 4.318791  | 3.026210  |
| H | 3.613116  | 5.371075  | 4.056019  |
| C | 3.744491  | 3.251024  | 0.668824  |
| C | 4.972482  | 2.952793  | 0.560197  |
| H | 2.690121  | 3.059833  | 0.792380  |
| H | 5.820479  | 2.289655  | 0.495481  |
| C | 2.910761  | 1.646769  | 5.161542  |
| C | 3.479550  | 0.719239  | 4.659773  |
| H | 2.403795  | 2.467576  | 5.618148  |
| H | 3.986138  | -0.109123 | 4.214928  |
| C | 4.315711  | 2.467301  | -4.471347 |
| C | 4.394390  | 3.666667  | -3.916027 |
| H | 4.290275  | 1.433550  | -4.149177 |
| H | 4.398378  | 4.564186  | -4.531549 |
| C | 4.637909  | 5.041125  | -1.896216 |
| C | 4.494068  | 3.808032  | -2.487776 |
| H | 4.676933  | 5.906583  | -2.549546 |
| H | 4.464567  | 2.899274  | -1.896429 |
| C | 2.026631  | 6.942401  | 0.466524  |
| C | 2.113226  | 7.267045  | -0.684620 |
| H | 1.944401  | 6.658796  | 1.494459  |
| H | 2.187790  | 7.556536  | -1.712040 |
| C | 4.699198  | 4.463872  | 0.626874  |
| C | 4.773098  | 5.302111  | -0.529063 |
| H | 4.908389  | 4.968482  | 1.565377  |
| H | 4.962170  | 6.350272  | -0.304414 |
| C | 6.661077  | 4.425987  | 3.695115  |
| C | 5.889171  | 3.544404  | 3.948562  |
| H | 7.354257  | 5.207923  | 3.474645  |
| H | 5.193707  | 2.766352  | 4.189246  |
| C | 7.635596  | 2.509363  | -5.508045 |
| C | 7.436836  | 1.554718  | -6.203390 |
| H | 7.817932  | 3.369704  | -4.901159 |
| H | 7.276792  | 0.703630  | -6.826340 |
| C | 7.924851  | 6.490732  | 0.226598  |
| C | 8.144192  | 5.322299  | 0.379402  |
| H | 7.738006  | 7.533103  | 0.086660  |
| H | 8.354581  | 4.283279  | 0.523787  |
| C | 0.492517  | 3.359827  | -2.781594 |
| C | 0.860949  | 4.102203  | -1.915570 |
| H | 0.151304  | 2.705347  | -3.553211 |
| H | 1.171023  | 4.795714  | -1.161342 |

|   |          |           |           |
|---|----------|-----------|-----------|
| C | 5.109347 | 9.039908  | -1.311269 |
| C | 5.847101 | 8.507324  | -2.091543 |
| H | 4.452039 | 9.523964  | -0.623270 |
| H | 6.503508 | 8.033459  | -2.791183 |
| C | 3.032477 | 7.432648  | -4.469146 |
| C | 2.201342 | 6.595213  | -4.256840 |
| H | 3.771941 | 8.175816  | -4.683808 |
| H | 1.458961 | 5.851568  | -4.063577 |
| C | 5.568491 | -0.619060 | 1.703087  |
| C | 4.423093 | -0.384343 | 1.442350  |
| H | 6.588931 | -0.833021 | 1.930229  |
| H | 3.403057 | -0.186690 | 1.195378  |
| C | 5.942178 | 9.606431  | -5.504482 |
| C | 5.856681 | 8.844153  | -6.424185 |
| H | 6.024575 | 10.299871 | -4.697418 |
| H | 5.789842 | 8.179316  | -7.256942 |
| C | 7.256117 | 5.990663  | -4.446652 |
| C | 7.804864 | 5.766585  | -3.404735 |
| H | 6.768910 | 6.188363  | -5.377408 |
| H | 8.290411 | 5.591334  | -2.468955 |
| C | 8.248503 | 1.845035  | 1.592179  |
| C | 8.628380 | 1.455135  | 0.524679  |
| H | 7.908921 | 2.199604  | 2.542247  |
| H | 8.988182 | 1.094068  | -0.412975 |
| C | 4.423117 | 5.518933  | -7.209231 |
| C | 5.332732 | 4.744662  | -7.302966 |
| H | 3.601247 | 6.195204  | -7.128112 |
| H | 6.132582 | 4.040657  | -7.383930 |

# EICO 15

1 2

|   |           |           |           |
|---|-----------|-----------|-----------|
| C | 0.370610  | -1.822845 | -0.098315 |
| C | 1.209463  | -1.373274 | 0.629092  |
| H | -0.385055 | -2.247443 | -0.721042 |
| H | 1.965653  | -0.985370 | 1.276993  |
| C | 2.010948  | 2.776014  | -3.702702 |
| C | 2.598712  | 1.815378  | -2.882811 |
| H | 1.283153  | 2.465641  | -4.445474 |
| H | 3.325353  | 2.144181  | -2.141574 |
| C | 0.288494  | 1.535951  | 4.111778  |
| C | 0.279604  | 2.710989  | 3.879355  |
| H | 0.271074  | 0.491077  | 4.326486  |
| H | 0.276548  | 3.761035  | 3.680902  |
| C | 0.923451  | 2.079738  | -0.043083 |
| C | 1.471505  | 3.114675  | 0.212999  |
| H | 0.438716  | 1.145297  | -0.225216 |
| H | 1.943229  | 4.034734  | 0.483697  |
| C | 3.690091  | 3.145934  | 2.850234  |
| C | 4.622382  | 3.767244  | 2.422376  |
| H | 2.848467  | 2.605403  | 3.229730  |
| H | 5.452924  | 4.331007  | 2.051539  |
| C | 6.802383  | 6.498378  | -3.394930 |
| C | 6.747447  | 5.300444  | -3.399890 |
| H | 6.876422  | 7.563728  | -3.380095 |
| H | 6.734065  | 4.230262  | -3.386763 |
| C | 7.357437  | 5.790145  | 0.354241  |
| C | 7.596433  | 5.859888  | 1.526096  |
| H | 7.158036  | 5.739842  | -0.693955 |
| H | 7.803082  | 5.935022  | 2.570577  |
| C | 0.680443  | 6.253118  | 2.311527  |
| C | 1.691405  | 6.080031  | 2.932272  |
| H | -0.216642 | 6.414243  | 1.756436  |

|   |           |           |           |
|---|-----------|-----------|-----------|
| H | 2.591074  | 5.926484  | 3.490240  |
| C | 1.923764  | 4.236162  | -3.115630 |
| C | 2.829636  | 4.090942  | -3.976580 |
| H | 1.255306  | 4.727653  | -2.423911 |
| H | 3.600008  | 4.362058  | -4.682332 |
| C | 3.753046  | 6.629807  | -1.380220 |
| C | 3.160011  | 6.636261  | -0.338209 |
| H | 4.307695  | 6.622764  | -2.293095 |
| H | 2.626567  | 6.658023  | 0.591066  |
| C | 5.335884  | 7.291972  | 3.870421  |
| C | 5.202391  | 6.325791  | 4.565450  |
| H | 5.466623  | 8.155461  | 3.257909  |
| H | 5.061985  | 5.466860  | 5.183267  |
| C | 2.859024  | -0.390979 | -2.060575 |
| C | 2.307860  | 0.418550  | -2.957995 |
| H | 3.516117  | -0.313291 | -1.197417 |
| H | 1.633035  | 0.049672  | -3.727621 |
| C | 5.109655  | 3.373618  | -0.857572 |
| C | 5.790039  | 2.394727  | -0.983529 |
| H | 4.526151  | 4.262186  | -0.733191 |
| H | 6.429393  | 1.544084  | -1.067644 |
| C | 2.509611  | 1.690147  | -7.042406 |
| C | 1.448665  | 2.128745  | -7.386928 |
| H | 3.456775  | 1.290468  | -6.749980 |
| H | 0.503595  | 2.501765  | -7.717563 |
| C | 4.191700  | 4.918279  | -7.245457 |
| C | 5.085202  | 5.448826  | -6.648205 |
| H | 3.403699  | 4.445720  | -7.790052 |
| H | 5.884776  | 5.922893  | -6.121670 |
| C | 5.703008  | 2.182058  | -5.253308 |
| C | 5.802715  | 1.303893  | -4.444209 |
| H | 5.622140  | 2.964471  | -5.980195 |
| H | 5.925892  | 0.516845  | -3.733719 |
| C | 2.255990  | 4.340743  | 6.323272  |
| C | 2.460938  | 5.510311  | 6.477293  |
| H | 2.051903  | 3.301238  | 6.196966  |
| H | 2.643530  | 6.551672  | 6.620703  |
| C | -0.815785 | 5.465553  | -1.022991 |
| C | -0.248974 | 6.485668  | -1.291056 |
| H | -1.326236 | 4.562942  | -0.773578 |
| H | 0.247372  | 7.400746  | -1.524284 |
| C | 9.080960  | 2.273519  | -2.883885 |
| C | 9.012247  | 2.880947  | -1.854234 |
| H | 9.163725  | 1.741722  | -3.804578 |
| H | 8.960609  | 3.425309  | -0.937161 |
| C | 4.823738  | -1.060051 | 0.945438  |
| C | 4.681884  | 0.104721  | 1.191663  |
| H | 4.960695  | -2.101755 | 0.756788  |
| H | 4.577970  | 1.143871  | 1.430935  |

EICO 16

1 2

|   |           |           |           |
|---|-----------|-----------|-----------|
| C | 0.645105  | 2.476644  | -1.174737 |
| C | 1.360523  | 2.207590  | 0.021497  |
| H | -0.311249 | 2.089668  | -1.523909 |
| H | 1.356633  | 1.462988  | 0.801253  |
| C | 1.117189  | 0.669680  | -3.804541 |
| C | 1.197376  | -0.093144 | -2.883926 |
| H | 1.054936  | 1.325008  | -4.644552 |
| H | 1.277523  | -0.790995 | -2.076441 |
| C | 0.448477  | 4.017223  | 3.303197  |
| C | 1.497889  | 4.594216  | 3.363676  |

|   |           |           |           |
|---|-----------|-----------|-----------|
| H | -0.497586 | 3.519776  | 3.280763  |
| H | 2.424008  | 5.123163  | 3.423968  |
| C | 4.058788  | 0.834969  | -0.918632 |
| C | 4.638731  | 1.790298  | -1.350262 |
| H | 3.556013  | -0.028220 | -0.538106 |
| H | 5.165362  | 2.636811  | -1.730313 |
| C | -2.899655 | 1.433336  | -1.848169 |
| C | -2.272861 | 0.611491  | -2.455551 |
| H | -3.481038 | 2.146012  | -1.304983 |
| H | -1.726680 | -0.114956 | -3.015465 |
| C | -3.307472 | 2.692015  | 4.018633  |
| C | -2.853463 | 3.700801  | 4.482268  |
| H | -3.729113 | 1.804270  | 3.598986  |
| H | -2.442260 | 4.599130  | 4.893200  |
| C | 1.306824  | 7.328423  | -0.359984 |
| C | 0.629573  | 7.022481  | 0.581100  |
| H | 1.899537  | 7.639021  | -1.191317 |
| H | 0.005909  | 6.773063  | 1.417298  |
| C | -1.894996 | 4.804746  | -0.261396 |
| C | -2.131972 | 4.017339  | 0.610880  |
| H | -1.700132 | 5.532959  | -1.017113 |
| H | -2.371552 | 3.333183  | 1.397684  |
| C | -0.827560 | 0.512985  | 2.417935  |
| C | -1.372978 | 0.475310  | 1.350013  |
| H | -0.357363 | 0.538597  | 3.380586  |
| H | -1.871266 | 0.435356  | 0.403716  |
| C | 2.079467  | 7.588435  | 5.059779  |
| C | 2.198838  | 8.188350  | 4.030174  |
| H | 1.957550  | 7.058946  | 5.979141  |
| H | 2.303269  | 8.739497  | 3.122710  |
| C | -5.593586 | 5.414787  | 2.430667  |
| C | -5.607919 | 5.771027  | 1.287220  |
| H | -5.579943 | 5.098748  | 3.450388  |
| H | -5.640290 | 6.097941  | 0.272112  |
| C | 4.101610  | 5.163080  | 0.901134  |
| C | 4.286051  | 4.008707  | 1.167047  |
| H | 3.945676  | 6.196348  | 0.684836  |
| H | 4.457062  | 2.981084  | 1.408087  |
| C | 2.842501  | 1.244110  | 3.067872  |
| C | 3.460615  | 0.334542  | 2.589453  |
| H | 2.298076  | 2.059029  | 3.496272  |
| H | 4.026946  | -0.473376 | 2.173907  |
| C | 2.326621  | -2.361115 | -0.181978 |
| C | 1.475347  | -1.805456 | 0.452891  |
| H | 3.091142  | -2.866185 | -0.730477 |
| H | 0.710386  | -1.332283 | 1.031245  |
| C | 1.478708  | 3.620490  | -0.052141 |
| C | 1.297262  | 3.710084  | -1.460840 |
| H | 1.346604  | 4.367184  | 0.725018  |
| H | 1.169523  | 4.508999  | -2.172737 |
| C | 6.001871  | -1.648043 | 0.608591  |
| C | 5.549320  | -2.528300 | 1.282569  |
| H | 6.415211  | -0.868700 | 0.008009  |
| H | 5.163771  | -3.321041 | 1.883721  |
| C | -2.307178 | 6.839176  | 2.975022  |
| C | -1.326869 | 7.080939  | 3.621083  |
| H | -3.189940 | 6.618519  | 2.414333  |
| H | -0.444592 | 7.297245  | 4.184499  |
| C | -0.282417 | 1.385339  | 5.881555  |
| C | 0.813825  | 0.901714  | 5.888161  |
| H | -1.262149 | 1.812540  | 5.880627  |
| H | 1.786180  | 0.461752  | 5.908280  |
| C | -0.759840 | 5.933178  | 7.025788  |

|   |           |           |          |
|---|-----------|-----------|----------|
| C | -0.106911 | 4.964725  | 6.760612 |
| H | -1.340412 | 6.793474  | 7.273659 |
| H | 0.471137  | 4.096507  | 6.532158 |
| C | -5.193057 | 2.020772  | 1.129049 |
| C | -4.974318 | 0.854191  | 0.965719 |
| H | -5.403090 | 3.058875  | 1.281645 |
| H | -4.805927 | -0.188425 | 0.814754 |

# EICO 17

1 2

|   |           |           |           |
|---|-----------|-----------|-----------|
| C | 3.299736  | -3.567357 | -3.897705 |
| C | 3.148922  | -2.878274 | -4.866141 |
| C | 2.219708  | -0.549817 | -1.995488 |
| C | 1.770038  | 0.326336  | -2.679858 |
| C | 0.539009  | 1.851941  | -0.046855 |
| C | -0.747291 | 1.328715  | -0.167072 |
| C | -1.045648 | 0.049629  | 0.703414  |
| C | -0.877911 | -0.197678 | -0.516871 |
| C | 0.852212  | 3.234954  | -0.239215 |
| C | 2.110384  | 3.621312  | -0.072747 |
| C | 0.627473  | 1.631346  | 3.303757  |
| C | 1.289625  | 0.645402  | 3.139041  |
| C | -3.574072 | 0.280290  | -2.578639 |
| C | -3.102538 | -0.451016 | -3.402673 |
| C | -1.187726 | -3.313540 | -2.357051 |
| C | -0.184826 | -3.017620 | -2.945169 |
| C | 4.312247  | 1.098306  | 1.364550  |
| C | 4.463083  | 0.899824  | 0.191694  |
| C | -2.431005 | -6.136824 | -0.007627 |
| C | -1.282685 | -6.187361 | 0.327803  |
| C | 0.426008  | -3.156634 | 0.953013  |
| C | 0.859878  | -3.090178 | 2.068392  |
| C | -0.884587 | 2.585892  | -3.684595 |
| C | -0.062955 | 3.453500  | -3.773737 |
| C | 5.652008  | -0.586592 | -3.139582 |
| C | 6.540683  | 0.086311  | -2.700623 |
| C | 4.860629  | -2.732976 | -0.488695 |
| C | 3.893060  | -3.310740 | -0.079821 |
| C | 2.590841  | -6.349331 | -1.135097 |
| C | 1.583756  | -5.961968 | -1.655210 |
| C | 4.050810  | -1.868849 | 3.242776  |
| C | 3.756060  | -1.675342 | 4.387971  |
| C | -4.291499 | 1.067535  | 1.008254  |
| C | -4.279689 | 2.189149  | 0.585236  |
| C | -3.903341 | -2.355057 | -0.073481 |
| C | -3.261608 | -2.912736 | 0.770971  |
| C | -2.266100 | 3.852360  | 3.164372  |
| C | -1.520652 | 4.726775  | 3.503436  |
| C | -2.372080 | 5.161947  | -0.187403 |
| C | -2.437028 | 4.952193  | -1.365521 |
| H | 3.427206  | -4.194405 | -3.041177 |
| H | 3.027251  | -2.279895 | -5.741075 |
| H | 0.717473  | -2.782218 | -3.471079 |
| H | -2.071213 | -3.582443 | -1.818107 |
| H | 0.047453  | -3.235339 | -0.044137 |
| H | 1.265254  | -3.043326 | 3.055353  |
| H | -0.837292 | -0.768064 | -1.429882 |
| H | -1.233279 | -0.109558 | 1.749502  |
| H | 5.719959  | -2.221986 | -0.865808 |
| H | 3.032149  | -3.827309 | 0.285660  |
| H | 4.198372  | 1.260418  | 2.413684  |
| H | 4.624389  | 0.714927  | -0.850122 |
| H | 1.363241  | 1.103350  | -3.291509 |

|   |           |           |           |
|---|-----------|-----------|-----------|
| H | 2.648502  | -1.330910 | -1.400839 |
| H | -4.324985 | 0.063166  | 1.372214  |
| H | -4.273437 | 3.189596  | 0.208461  |
| H | -2.693011 | -1.112252 | -4.134363 |
| H | -4.007888 | 0.914149  | -1.834963 |
| H | 0.058403  | 3.927651  | -0.512474 |
| H | 3.056203  | 3.155288  | 0.188490  |
| H | 4.872822  | -1.201633 | -3.537396 |
| H | 7.342395  | 0.682969  | -2.326946 |
| H | -2.944865 | 3.081716  | 2.868157  |
| H | -0.871325 | 5.511043  | 3.823940  |
| H | -0.258238 | -6.248385 | 0.620299  |
| H | -3.457381 | -6.108180 | -0.296203 |
| H | -1.568697 | 1.995359  | -0.415360 |
| H | 1.350592  | 1.177830  | 0.216122  |
| H | -1.624393 | 1.815452  | -3.618979 |
| H | 0.660248  | 4.232313  | -3.872563 |
| H | -2.320292 | 5.348258  | 0.863737  |
| H | -2.486295 | 4.783211  | -2.418400 |
| H | 4.323265  | -2.047099 | 2.223861  |
| H | 3.513981  | -1.508020 | 5.413634  |
| H | -4.472178 | -1.868407 | -0.834665 |
| H | -2.690670 | -3.436812 | 1.506129  |
| H | 0.681472  | -5.629976 | -2.120410 |
| H | 3.488070  | -6.707811 | -0.682328 |
| H | 0.027313  | 2.502241  | 3.463809  |
| H | 1.896972  | -0.227352 | 3.019810  |

# EICO 18

1 2

|   |           |           |           |
|---|-----------|-----------|-----------|
| C | -0.708345 | 0.234353  | -2.769899 |
| C | -0.759562 | 1.338771  | -3.497611 |
| H | -0.633149 | -0.743675 | -3.241610 |
| H | -0.845723 | 2.413053  | -3.377358 |
| C | 2.691514  | 1.042517  | -2.123272 |
| C | 2.715565  | 1.407496  | -0.982839 |
| H | 2.683058  | 0.720609  | -3.140335 |
| H | 2.752227  | 1.718217  | 0.037942  |
| C | -4.212591 | 0.457688  | 1.074575  |
| C | -4.709866 | -0.633348 | 1.069044  |
| H | -3.818910 | 1.452401  | 1.094939  |
| H | -5.160175 | -1.602260 | 1.069341  |
| C | -0.014620 | 3.997501  | -0.733022 |
| C | -1.160380 | 4.119127  | -0.398510 |
| H | 1.005142  | 3.931297  | -1.050195 |
| H | -2.179287 | 4.248766  | -0.094527 |
| C | -3.259447 | -2.829093 | -2.856761 |
| C | -3.583887 | -1.983079 | -2.072567 |
| H | -2.987149 | -3.580936 | -3.563797 |
| H | -3.886341 | -1.236563 | -1.368395 |
| C | 1.852709  | 0.611155  | 2.743355  |
| C | 2.372945  | -0.210717 | 2.044020  |
| H | 1.389735  | 1.338823  | 3.373026  |
| H | 2.856961  | -0.931740 | 1.423426  |
| C | -0.791913 | -0.831301 | -0.543820 |
| C | -0.788207 | 0.293114  | -1.337465 |
| H | -0.723555 | -1.814812 | -0.998555 |
| H | -0.867400 | 1.277438  | -0.877936 |
| C | -4.151718 | 1.809853  | -2.544935 |
| C | -3.658761 | 2.902381  | -2.517033 |
| H | -4.632184 | 0.856153  | -2.587332 |
| H | -3.249968 | 3.890760  | -2.500718 |
| C | -1.067014 | 2.668228  | 2.741261  |

|   |           |           |           |
|---|-----------|-----------|-----------|
| C | -1.622357 | 2.031851  | 3.591222  |
| H | -0.584690 | 3.244836  | 1.980327  |
| H | -2.121681 | 1.483105  | 4.358117  |
| C | -0.694601 | -1.674466 | 3.189321  |
| C | -1.942541 | -1.665259 | 2.964355  |
| H | 0.198450  | -1.660830 | 3.788913  |
| H | -2.992689 | -1.625160 | 3.191694  |
| C | -6.891644 | -0.966517 | -2.290813 |
| C | -7.110613 | 0.123742  | -1.846067 |
| H | -6.712547 | -1.938477 | -2.691223 |
| H | -7.313870 | 1.102256  | -1.468137 |
| C | 2.736289  | 5.750400  | -2.248402 |
| C | 3.333661  | 4.723786  | -2.405681 |
| H | 2.203638  | 6.668795  | -2.120759 |
| H | 3.878897  | 3.816193  | -2.535828 |
| C | -5.072266 | 4.297686  | -5.578608 |
| C | -5.019369 | 5.380248  | -5.069005 |
| H | -5.128872 | 3.338469  | -6.041514 |
| H | -4.969764 | 6.342255  | -4.608909 |
| C | -3.900561 | -4.431184 | 2.016957  |
| C | -3.728380 | -4.137091 | 0.868774  |
| H | -4.062780 | -4.720321 | 3.031106  |
| H | -3.589498 | -3.888803 | -0.161407 |
| C | -1.067205 | -1.838829 | 1.705191  |
| C | -0.953221 | -0.719703 | 0.830059  |
| H | -1.005041 | -2.827305 | 1.255103  |
| H | -1.025226 | 0.272270  | 1.275766  |
| C | -1.353857 | 4.827641  | -4.694945 |
| C | -0.239843 | 4.874402  | -4.254837 |
| H | -2.349213 | 4.795118  | -5.086443 |
| H | 0.757158  | 4.923933  | -3.871226 |
| C | -4.155788 | 4.206280  | 1.787357  |
| C | -4.739066 | 3.907348  | 0.784139  |
| H | -3.644421 | 4.475639  | 2.684091  |
| H | -5.274970 | 3.648294  | -0.104701 |
| C | -3.137559 | 6.615351  | -2.035305 |
| C | -4.257038 | 6.387380  | -1.672686 |
| H | -2.139164 | 6.832293  | -2.351500 |
| H | -5.256690 | 6.192144  | -1.351402 |
| C | -7.742267 | 4.089979  | -1.213993 |
| C | -7.081326 | 3.991453  | -2.208418 |
| H | -8.344202 | 4.187423  | -0.338315 |
| H | -6.495110 | 3.918358  | -3.099740 |
| C | 0.070456  | 8.408181  | -1.893721 |
| C | 0.143324  | 8.216305  | -3.073463 |
| H | -0.002567 | 8.595646  | -0.846036 |
| H | 0.202504  | 8.053621  | -4.126494 |

# EICO 19

1 2

|   |           |           |           |
|---|-----------|-----------|-----------|
| C | 0.907530  | 2.035990  | 2.755430  |
| C | 0.070405  | 1.191735  | 2.600809  |
| C | -3.002042 | 2.687627  | 2.299169  |
| C | -3.868638 | 2.426698  | 1.513551  |
| C | -6.115687 | -0.236793 | 1.500286  |
| C | -5.975275 | -0.798847 | 0.451968  |
| C | 1.855924  | -1.854202 | 2.816392  |
| C | 1.960267  | -2.868998 | 2.186775  |
| C | -1.582715 | 2.896751  | -1.134541 |
| C | -1.272985 | 3.302359  | -2.219272 |
| C | 1.521259  | 1.297917  | -1.171907 |
| C | 2.437528  | 1.778044  | -0.460113 |
| C | 2.191117  | 0.253414  | -0.174868 |



|   |           |           |           |
|---|-----------|-----------|-----------|
| C | 2.983671  | -0.722244 | -0.769899 |
| C | 3.767397  | -0.564634 | -1.960427 |
| C | 4.396438  | -1.626376 | -2.442489 |
| C | 0.511755  | -2.217405 | -2.409962 |
| C | 0.036777  | -2.277595 | -1.310637 |
| C | -0.468513 | 0.495023  | -4.136767 |
| C | 0.491058  | 0.893248  | -4.734567 |
| C | 5.910846  | 1.492395  | -0.062770 |
| C | 5.946454  | 2.434431  | -0.801988 |
| C | -3.224154 | -1.133367 | -2.029841 |
| C | -3.577650 | 0.006635  | -2.147076 |
| C | -2.383708 | -1.198368 | 1.387335  |
| C | -1.783396 | -1.985206 | 2.063966  |
| C | 5.459115  | -2.040750 | 1.494953  |
| C | 6.391651  | -1.971057 | 0.745778  |
| C | -2.320403 | -4.767227 | -1.540806 |
| C | -2.879497 | -4.548427 | -0.504041 |
| C | 3.920790  | -4.695107 | -0.383366 |
| C | 2.857579  | -4.636947 | -0.933553 |
| C | -4.911368 | -3.814158 | 2.522291  |
| C | -4.672634 | -4.967251 | 2.739614  |
| C | -5.252075 | 3.331026  | -1.698073 |
| C | -6.113234 | 2.510121  | -1.559830 |
| C | 3.024808  | 4.755806  | 1.456430  |
| C | 4.122140  | 4.304864  | 1.627643  |
| C | -0.644575 | 5.347680  | 1.423143  |
| C | -0.338444 | 5.766164  | 2.502606  |
| H | 1.644283  | 2.797188  | 2.894668  |
| H | -0.683586 | 0.442913  | 2.467662  |
| H | -2.231653 | 2.936671  | 2.994567  |
| H | -4.645524 | 2.217123  | 0.809912  |
| H | 1.645958  | -0.007938 | 0.724371  |
| H | 3.001184  | -1.705989 | -0.303034 |
| H | -0.929509 | 4.984035  | 0.460316  |
| H | -0.077121 | 6.150460  | 3.463075  |
| H | 5.107806  | 3.923156  | 1.774020  |
| H | 2.045712  | 5.169311  | 1.331071  |
| H | -1.005167 | 3.651182  | -3.191868 |
| H | -1.883520 | 2.556888  | -0.164196 |
| H | 0.904623  | -2.148862 | -3.400006 |
| H | -0.420328 | -2.326768 | -0.343423 |
| H | -1.264217 | -2.688049 | 2.677069  |
| H | -2.944322 | -0.509818 | 0.792068  |
| H | 5.998813  | 3.280619  | -1.450455 |
| H | 5.900337  | 0.648170  | 0.592931  |
| H | 4.866145  | -4.759170 | 0.109077  |
| H | 1.905086  | -4.589258 | -1.414893 |
| H | -1.831681 | -4.973429 | -2.465656 |
| H | -3.388543 | -4.372234 | 0.421102  |
| H | 2.063558  | -3.778832 | 1.635517  |
| H | 1.745357  | -0.954144 | 3.382084  |
| H | -4.489217 | 4.067419  | -1.818271 |
| H | -6.887315 | 1.786184  | -1.433412 |
| H | -3.917200 | 1.015627  | -2.249278 |
| H | -2.930896 | -2.155454 | -1.909433 |
| H | -6.247067 | 0.263553  | 2.433623  |
| H | -5.845136 | -1.298531 | -0.482078 |
| H | 3.078879  | 2.521823  | -0.011817 |
| H | 0.717526  | 1.207661  | -1.885014 |
| H | -5.136170 | -2.789086 | 2.323558  |
| H | -4.475798 | -5.996074 | 2.939589  |
| H | 7.237928  | -1.907982 | 0.098007  |
| H | 4.632745  | -2.117706 | 2.169154  |

|   |           |           |           |
|---|-----------|-----------|-----------|
| H | 3.835439  | 0.406821  | -2.441459 |
| H | 4.496691  | -2.676400 | -2.187009 |
| H | 1.326364  | 1.248564  | -5.295141 |
| H | -1.330095 | 0.139243  | -3.608529 |

# EICO 20

1 2

|   |           |           |           |
|---|-----------|-----------|-----------|
| C | 1.214620  | 0.117598  | 1.985352  |
| C | 2.365369  | 0.410388  | 1.821200  |
| H | 0.190735  | -0.150620 | 2.125994  |
| H | 3.393377  | 0.668576  | 1.676506  |
| C | 2.754378  | 5.477007  | -4.724234 |
| C | 3.026354  | 4.308922  | -4.705217 |
| H | 2.510664  | 6.518431  | -4.771567 |
| H | 3.262663  | 3.266004  | -4.708154 |
| C | 2.372581  | 6.969178  | 4.413930  |
| C | 1.501803  | 6.224464  | 4.765270  |
| H | 3.143495  | 7.650127  | 4.129981  |
| H | 0.724772  | 5.566247  | 5.095715  |
| C | 5.356385  | 2.568079  | 0.982667  |
| C | 5.267851  | 2.615781  | 2.177639  |
| H | 5.447521  | 2.521366  | -0.083402 |
| H | 5.194148  | 2.643868  | 3.242989  |
| C | -1.992303 | 2.100403  | 1.545989  |
| C | -1.760228 | 2.112942  | 2.721805  |
| H | -2.222944 | 2.088372  | 0.503774  |
| H | -1.568929 | 2.137017  | 3.774085  |
| C | 4.811187  | 1.864899  | -2.600123 |
| C | 5.898674  | 2.356249  | -2.704695 |
| H | 3.839175  | 1.426535  | -2.538094 |
| H | 6.869532  | 2.788414  | -2.802375 |
| C | 1.318794  | 3.885260  | 2.309596  |
| C | 0.554003  | 4.736897  | 1.467135  |
| H | 1.194533  | 2.925430  | 2.784166  |
| H | -0.339071 | 4.531259  | 0.881302  |
| C | 1.484109  | 3.483745  | -1.619993 |
| C | 1.375198  | 2.451057  | -1.019392 |
| H | 1.582136  | 4.398220  | -2.168098 |
| H | 1.293838  | 1.528928  | -0.483204 |
| C | 0.679472  | 7.224845  | -1.918145 |
| C | 1.864817  | 7.396540  | -1.860729 |
| H | -0.379194 | 7.093802  | -2.002458 |
| H | 2.920350  | 7.553531  | -1.817824 |
| C | 1.584941  | 5.688562  | 1.226585  |
| C | 2.328392  | 4.519928  | 1.537632  |
| H | 1.704460  | 6.544275  | 0.579700  |
| H | 3.212532  | 4.101147  | 1.060373  |
| C | -1.663151 | 3.181537  | -4.666257 |
| C | -0.613753 | 3.749377  | -4.779428 |
| H | -2.601284 | 2.678439  | -4.587853 |
| H | 0.328273  | 4.242887  | -4.902406 |
| C | 1.634930  | 0.886074  | -4.542711 |
| C | 2.644007  | 0.310006  | -4.833372 |
| H | 0.727279  | 1.396928  | -4.306933 |
| H | 3.536652  | -0.210138 | -5.100334 |
| C | -2.444607 | 5.333619  | -0.593411 |
| C | -1.850115 | 4.576041  | -1.307152 |
| H | -2.981951 | 6.017082  | 0.026159  |
| H | -1.333049 | 3.919241  | -1.973644 |
| C | 3.173355  | 3.069850  | 5.260362  |
| C | 3.056225  | 1.902320  | 5.016997  |
| H | 3.274928  | 4.109357  | 5.486003  |

|   |           |           |           |
|---|-----------|-----------|-----------|
| H | 2.959050  | 0.860207  | 4.805330  |
| C | -2.063808 | 5.650379  | 2.844973  |
| C | -1.460648 | 6.669102  | 3.032188  |
| H | -2.601602 | 4.741891  | 2.679089  |
| H | -0.932839 | 7.578541  | 3.218279  |
| C | -1.306959 | 3.957624  | 5.894525  |
| C | -0.339644 | 3.269359  | 6.056102  |
| H | -2.169931 | 4.573404  | 5.770902  |
| H | 0.528037  | 2.667647  | 6.217305  |
| C | 5.139849  | 5.849926  | -0.368390 |
| C | 4.651217  | 5.410772  | -1.370692 |
| H | 5.608641  | 6.231158  | 0.510937  |
| H | 4.242452  | 5.022603  | -2.280229 |
| C | -0.129828 | 10.745012 | -2.475349 |
| C | -0.979502 | 11.257012 | -1.804810 |
| H | 0.624189  | 10.293560 | -3.082834 |
| H | -1.728332 | 11.730528 | -1.211304 |
| C | -2.260396 | 8.184039  | -3.780344 |
| C | -2.292383 | 7.041424  | -4.139911 |
| H | -2.218451 | 9.202681  | -3.459596 |
| H | -2.326764 | 6.024393  | -4.463676 |
| C | 2.127124  | 9.182538  | -5.512389 |
| C | 1.044639  | 8.702011  | -5.332628 |
| H | 3.083776  | 9.619018  | -5.692542 |
| H | 0.072243  | 8.285789  | -5.174343 |
